# Supplementary material for: Synthesis of 1,4-benzoxazines via Y(OTf)3-catalyzed ring opening/annulation cascade reaction of benzoxazoles with propargylic alcohols
Source: Royal Society of Chemistry journal article supplement (doi:10.1039/d2cc03080b), 2022-01-01

*Supporting Information*

Synthesis of 1,4-Benzoxazines via Y(OTf)<sub>3</sub>-Catalyzed Ring  
Opening/Annulation Cascade Reaction of Benzoxazoles with  
Propargylic Alcohols

Hongbo Qi, Yupeng Zhao, Wencong Li, Shufeng Chen\*

Inner Mongolia Key Laboratory of Fine Organic Synthesis, Department of Chemistry  
and Chemical Engineering, Inner Mongolia University, Hohhot 010021, China

E-mail: shufengchen@imu.edu.cn

CONTENTS

|                                                                        |     |
|------------------------------------------------------------------------|-----|
| 1. General Information.....                                            | S2  |
| 2. General Procedure for the Preparation of Substrates <b>1</b> .....  | S3  |
| 3. General Procedure for the Synthesis of Products <b>3</b> .....      | S4  |
| 4. Spectral Data for the Compounds <b>3</b> .....                      | S4  |
| 5. Scale-up Reaction and Derivatizations.....                          | S16 |
| 6. Control Experiments.....                                            | S21 |
| 7. X-Ray Analysis Data of Single Crystal <b>3a</b> and <b>3j</b> ..... | S24 |
| 8. References.....                                                     | S27 |
| 9. <sup>1</sup> H and <sup>13</sup> C NMR Spectra.....                 | S28 |

## ***1. General Information***

All commercially available reagents were used directly without purification unless otherwise stated. All solvents were purified following standard procedures. For chromatography, 200-300 mesh silica gel (Qingdao, China) was employed. NMR spectra were recorded on a Bruker advance III 500 ( $^1\text{H}$  NMR: 500 MHz,  $^{13}\text{C}$  NMR: 126 MHz) spectrometer.  $^1\text{H}$  NMR spectra were referenced to the residual solvent signal ( $\text{CDCl}_3 = 7.26$  ppm) or TMS.  $^{13}\text{C}$  NMR spectra were referenced to the residual solvent signal ( $\text{CDCl}_3 = 77.0$  ppm). Chemical shifts are given in ppm. IR spectra were recorded on a FT-IR instrument. The HRMS analysis was obtained on a QTOF mass spectrometer. Melting points were determined with melting points apparatus and are uncorrected. X-ray diffraction data were collected at 273 K or 293 K on a Rigaku Oxford Diffraction Supernova Dual Source, Cu at Zero equipped with an AtlasS2 CCD using Cu  $K\alpha$  radiation. Enantiomeric excesses (ee) were determined by HPLC analysis on Shimadzu (LC-2020) HPLC or Thermo Fisher HPLC with Daicel chiral columns. Substrates **1**<sup>1,2</sup>, compound **8**<sup>3</sup> and (*S*)-**1a**<sup>4</sup> were synthesized in the lab by the reported procedures. Substrates **2** were purchased from commercial sources and used directly without further purification unless otherwise stated.

## 2. General Procedure for the Preparation of Substrates 1

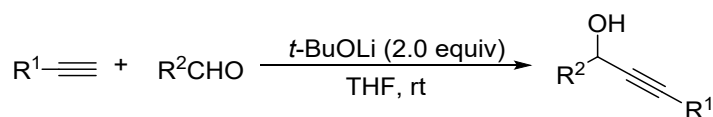

**Scheme S1**

To the solution of aldehydes (1.0 equiv, 10.0 mmol) and alkynes (1.1 equiv, 11.0 mmol) in THF (10.0 mL) was added *t*-BuOLi (1.1 equiv, 11.0 mmol, 1.8 g) at room temperature. The solution was stirred at room temperature for overnight. After the completion of the reaction, the mixture was quenched by the addition of water and extracted with EtOAc. The combined organic phase was washed with brine, dried over Na<sub>2</sub>SO<sub>4</sub>, filtered, and concentrated under reduced pressure. Purification by column chromatography (petroleum ether/ethyl acetate = 20:1, v/v) afforded the desired products **1** (Scheme S1).

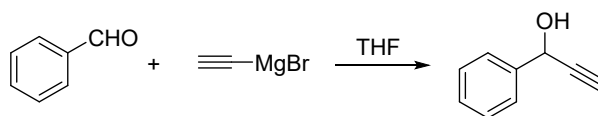

**Scheme S2**

To a solution of benzaldehyde (10.0 mmol, 1.06 g, 1.0 equiv) in THF (30.0 mL) was added dropwise ethynylmagnesium bromide (1.5 equiv, 0.5 M solution in THF, 30.0 mL) at 0 °C under argon. Then the mixture was warmed up to room temperature and stirred for 5 h. The resulting reaction mixture was quenched with saturated NH<sub>4</sub>Cl solution, and extracted with ethyl acetate. The combined organic extracts were washed with water and brine, and dried over Na<sub>2</sub>SO<sub>4</sub>. The solvent was evaporated and the residue was purified by column chromatography on silica gel (petroleum ether/ethyl acetate = 15:1) to afford the desired product **1j** as a yellow oil (1.2 g, 91% yield) (Scheme S2).

### 3. General Procedure for the Synthesis of *Products 3*

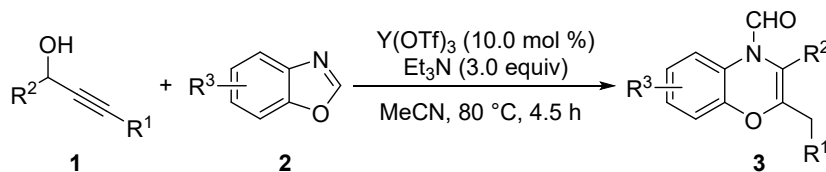

**Scheme S3**

To a solution of compounds **1** (0.2 mmol, 1.0 equiv), compounds **2** (0.3 mmol, 1.5 equiv), and Et<sub>3</sub>N (61.0 mg, 0.6 mmol, 3.0 equiv) in MeCN (2.0 mL) was added Y(OTf)<sub>3</sub> (10.7 mg, 10.0 mol %) under an air atmosphere in a sealed tube. The resulting mixture was stirred at 80 °C in an oil bath for the indicated time. After cooling at room temperature, the mixture was concentrated under reduced pressure. The residue was purified on a silica gel column to afford the products **3** (Scheme S3).

### 4. Spectral Data for the Compounds 3

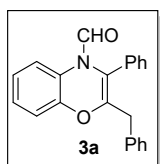

*2-Benzyl-3-phenyl-4H-benzo[b][1,4]oxazine-4-carbaldehyde* (**3a**).

Purification by column chromatography on silica gel (petroleum ether/ethyl acetate = 10:1, v/v) afforded the title compound as a yellow solid (44 mg, 68% yield). Mp: 120-123 °C. <sup>1</sup>H NMR (500 MHz, CDCl<sub>3</sub>) δ 8.13 (s, 1H), 7.99 – 7.94 (m, 1H), 7.48 – 7.38 (m, 5H), 7.33 – 7.19 (m, 5H), 7.12 – 7.05 (m, 2H), 6.87 – 6.81 (m, 1H), 3.53 (s, 2H). <sup>13</sup>C NMR (126 MHz, CDCl<sub>3</sub>) δ 160.3, 148.5, 142.4, 137.0, 132.7, 129.9, 129.4, 129.0, 128.5, 128.3, 126.9, 126.7, 126.5, 123.4, 122.4, 119.7, 116.1, 36.1. IR (KBr): 2783, 1679, 1584, 1495, 1450, 1349, 1301, 1236, 1129, 965, 915, 757, 706, 617 cm<sup>-1</sup>. HRMS (ESI) *m/z*: calcd for C<sub>22</sub>H<sub>17</sub>NO<sub>2</sub>Na [M+Na]<sup>+</sup> 350.1130, found 350.1130.

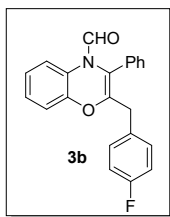

*2-(4-Fluorobenzyl)-3-phenyl-4H-benzo[b][1,4]oxazine-4-*

*carbaldehyde (3b)*. Purification by column chromatography on silica gel

(petroleum ether/ethyl acetate = 10:1, v/v) afforded the title compound

as yellow solid (49 mg, 71% yield). Mp: 123-125 °C. <sup>1</sup>H NMR (500

MHz, CDCl<sub>3</sub>) δ 8.12 (s, 1H), 7.96 (d, J = 7.0 Hz, 1H), 7.45 – 7.37 (m, 5H), 7.15 – 7.04

(m, 5H), 6.98 – 6.93 (m, 2H), 6.83 (d, J = 7.3 Hz, 1H), 3.48 (s, 2H). <sup>13</sup>C NMR (126

MHz, CDCl<sub>3</sub>) δ 161.7 (d, *J*<sub>C-F</sub> = 244.8 Hz), 160.2, 148.4, 142.2, 132.6, 132.5, 129.8,

129.8, 129.4, 129.1, 126.9, 123.4, 122.4, 119.7, 116.0, 115.3 (d, *J*<sub>C-F</sub> = 21.3 Hz). 35.3.

IR (KBr): 2782, 1689, 1584, 1502, 1497, 1350, 1304, 1234, 1149, 1078, 962, 827, 756,

697 cm<sup>-1</sup>. HRMS (ESI) *m/z*: calcd for C<sub>22</sub>H<sub>16</sub>FNO<sub>2</sub>Na [M+Na]<sup>+</sup> 368.1057, found

368.1050.

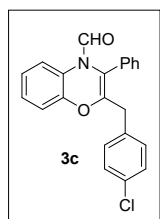

*2-(4-Chlorobenzyl)-3-phenyl-4H-benzo[b][1,4]oxazine-4-*

*carbaldehyde (3c)*. Purification by column chromatography on silica

gel (petroleum ether/ethyl acetate = 10:1, v/v) afforded the title

compound as a yellow solid (52 mg, 73% yield). Mp: 111-114 °C. <sup>1</sup>H

NMR (500 MHz, CDCl<sub>3</sub>) δ 8.12 (s, 1H), 7.96 (d, J = 7.2 Hz, 1H), 7.45 – 7.36 (m, 5H),

7.28 – 7.20 (m, 2H), 7.12 – 7.07 (m, 4H), 6.83 (d, J = 7.5 Hz, 1H), 3.48 (s, 2H). <sup>13</sup>C

NMR (126 MHz, CDCl<sub>3</sub>) δ 160.2, 148.4, 141.8, 135.4, 132.5, 132.4, 129.8, 129.7,

129.4, 129.1, 128.6, 126.9, 126.5, 123.5, 122.4, 119.9, 116.0, 35.4. IR (KBr): 2789,

1673, 1590, 1489, 1349, 1295, 1233, 1150, 1069, 962, 745, 703, 626 cm<sup>-1</sup>. HRMS (ESI)

*m/z*: calcd for C<sub>22</sub>H<sub>16</sub>ClNO<sub>2</sub>Na [M+Na]<sup>+</sup> 384.0761, found 384.0741.

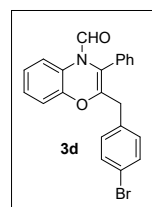

*2-(4-Bromobenzyl)-3-phenyl-4H-benzo[b][1,4]oxazine-4-*

*carbaldehyde (3d)*. Purification by column chromatography on silica

gel (petroleum ether/ethyl acetate = 10:1, v/v) afforded the title

compound as a yellow solid (59 mg, 73% yield). Mp: 129-130 °C. <sup>1</sup>H NMR (500

MHz, CDCl<sub>3</sub>) δ 8.12 (s, 1H), 7.95 (d, J = 7.3 Hz, 1H), 7.47 – 7.42 (m, 2H), 7.39 (t, J =

7.1 Hz, 5H), 7.11 – 7.03 (m, 4H), 6.83 (d, J = 7.4 Hz, 1H), 3.47 (s, 2H). <sup>13</sup>C NMR (126

MHz, CDCl<sub>3</sub>) δ 160.2, 148.4, 141.7, 136.0, 132.4, 131.6, 130.1, 129.8, 129.4, 129.2,

127.0, 123.5, 122.4, 120.6, 119.9, 116.0, 35.5. IR (KBr): 2783, 1685, 1590, 1488, 1406, 1352, 1295, 1242, 1147, 1072, 1000, 965, 837, 754, 703, 620  $\text{cm}^{-1}$ . HRMS (ESI)  $m/z$ : calcd for  $\text{C}_{22}\text{H}_{16}\text{BrNO}_2\text{Na}$   $[\text{M}+2+\text{Na}]^+$  430.0238, found 430.0219.

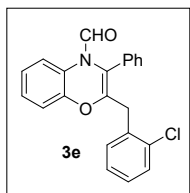

*2-(2-Chlorobenzyl)-3-phenyl-4H-benzo[b][1,4]oxazine-4-*

*carbaldehyde (3e)*. Purification by column chromatography on silica gel (petroleum ether/ethyl acetate = 10:1, v/v) afforded the title compound as a yellow solid (42 mg, 58% yield). Mp: 118-120  $^{\circ}\text{C}$ .  $^1\text{H}$

NMR (500 MHz,  $\text{CDCl}_3$ )  $\delta$  8.14 (s, 1H), 7.96 (d,  $J = 8.5$  Hz, 1H), 7.46 – 7.38 (m, 5H), 7.30 – 7.25 (m, 1H), 7.23 – 7.17 (m, 1H), 7.10 – 7.05 (m, 3H), 6.99 (t,  $J = 9.1$  Hz, 1H), 6.82 (d,  $J = 8.6$  Hz, 1H), 3.58 (s, 2H).  $^{13}\text{C}$  NMR (126 MHz,  $\text{CDCl}_3$ )  $\delta$  160.2, 148.5, 141.1, 132.5, 130.2, 130.2, 129.8, 129.4, 129.1, 128.5, 128.4, 126.9, 124.1, 124.0, 123.9, 123.7, 123.5, 122.4, 120.2, 29.2. IR (KBr): 2884, 1682, 1587, 1492, 1450, 1358, 1304, 1236, 1147, 1078, 757, 703, 629  $\text{cm}^{-1}$ . HRMS (ESI)  $m/z$ : calcd for  $\text{C}_{22}\text{H}_{16}\text{ClNO}_2\text{Na}$   $[\text{M}+\text{Na}]^+$  384.0761, found 384.0749.

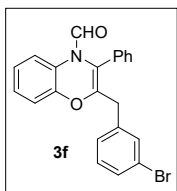

*2-(3-Bromobenzyl)-3-phenyl-4H-benzo[b][1,4]oxazine-4-*

*carbaldehyde (3f)*. Purification by column chromatography on silica gel (petroleum ether/ethyl acetate = 10:1, v/v) afforded the title compound as a yellow solid (55 mg, 68% yield). Mp: 115-117  $^{\circ}\text{C}$ .  $^1\text{H}$

NMR (500 MHz,  $\text{CDCl}_3$ )  $\delta$  8.12 (s, 1H), 7.94 (d,  $J = 7.3$  Hz, 1H), 7.40 – 7.36 (m, 2H), 7.29 (t,  $J = 7.3$  Hz, 2H), 7.23 (d,  $J = 7.2$  Hz, 1H), 7.18 (d,  $J = 7.4$  Hz, 2H), 7.15 – 7.06 (m, 4H), 6.85 (d,  $J = 7.3$  Hz, 1H), 3.50 (s, 2H).  $^{13}\text{C}$  NMR (126 MHz,  $\text{CDCl}_3$ )  $\delta$  160.1, 149.3, 142.6, 136.8, 131.9, 131.8, 128.6, 128.3, 127.0, 126.8, 126.4, 123.47, 122.4, 119.0, 116.7, 116.5, 116.1, 36.1. IR (KBr): 2878, 1593, 1498, 1415, 1349, 1304, 1230, 1147, 1084, 971, 831, 751, 700, 599  $\text{cm}^{-1}$ . HRMS (ESI)  $m/z$ : calcd for  $\text{C}_{22}\text{H}_{16}\text{BrNO}_2\text{Na}$   $[\text{M}+2+\text{Na}]^+$  430.0238, found 430.0210.

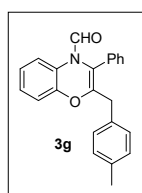

*2-(4-Methylbenzyl)-3-phenyl-4H-benzo[b][1,4]oxazine-4-*

*carbaldehyde (3g)*. Purification by column chromatography on silica gel (petroleum

ether/ethyl acetate = 10:1, v/v) afforded the title compound as a yellow solid (38 mg, 55% yield). Mp: 63-64 °C. <sup>1</sup>H NMR (500 MHz, CDCl<sub>3</sub>) δ 8.12 (s, 1H), 7.94 (d, J = 7.5 Hz, 1H), 7.46 – 7.38 (m, 5H), 7.08 (d, J = 13.2 Hz, 6H), 6.85 (d, J = 7.4 Hz, 1H), 3.48 (s, 2H), 2.31 (s, 3H). <sup>13</sup>C NMR (126 MHz, CDCl<sub>3</sub>) δ 160.3, 148.6, 142.6, 136.2, 133.9, 132.7, 129.9, 129.3, 129.2, 129.0, 128.2, 126.8, 123.3, 122.4, 119.5, 116.1, 35.7, 21.0. IR (KBr): 2966, 2873, 1687, 1580, 1488, 1351, 1298, 1235, 1137, 958, 828, 754, 694, 629 cm<sup>-1</sup>. HRMS (ESI) *m/z*: calcd for C<sub>23</sub>H<sub>19</sub>NO<sub>2</sub>Na [M+Na]<sup>+</sup> 364.1308, found 364.1288.

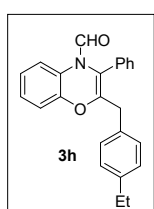

*2-(4-Ethylbenzyl)-3-phenyl-4H-benzo[b][1,4]oxazine-4-carbaldehyde*

**(3h)**. Purification by column chromatography on silica gel (petroleum ether/ethyl acetate = 10:1, v/v) afforded the title compound as a yellow solid (49 mg, 69% yield). Mp: 67-69 °C. <sup>1</sup>H NMR (500 MHz, CDCl<sub>3</sub>) δ

8.13 (s, 1H), 7.96 (d, J = 7.4 Hz, 1H), 7.45 – 7.34 (m, 5H), 7.14 – 7.04 (m, 6H), 6.89 – 6.83 (m, 1H), 3.49 (s, 2H), 2.61 (d, J = 7.6 Hz, 2H), 1.21 (t, J = 7.6 Hz, 3H). <sup>13</sup>C NMR (126 MHz, CDCl<sub>3</sub>) δ 160.3, 148.5, 142.6, 134.1, 132.7, 129.8, 129.3, 128.9, 128.2, 128.0, 126.8, 126.5, 123.3, 122.4, 119.5, 116.1, 35.7, 28.4, 15.5. IR (KBr): 2956, 2927, 2870, 1684, 1592, 1491, 1351, 1301, 1235, 1134, 971, 754, 700, 623 cm<sup>-1</sup>. HRMS (ESI) *m/z*: calcd for C<sub>24</sub>H<sub>21</sub>NO<sub>2</sub>Na [M+Na]<sup>+</sup> 378.1464, found 378.1445.

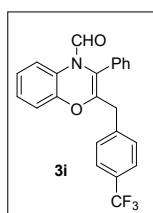

*3-Phenyl-2-(4-(trifluoromethyl)benzyl)-4H-benzo[b][1,4]oxazine-4-carbaldehyde (3i)*. Purification by column chromatography on silica gel

(petroleum ether/ethyl acetate = 10:1, v/v) afforded the title compound as a yellow solid (64 mg, 81% yield). Mp: 89-94 °C. <sup>1</sup>H NMR (500 MHz,

CDCl<sub>3</sub>) δ 8.13 (s, 1H), 7.97 (d, J = 7.2 Hz, 1H), 7.53 (d, J = 8.1 Hz, 2H), 7.46 – 7.37 (m, 5H), 7.29 (d, J = 8.0 Hz, 2H), 7.13 – 7.04 (m, 2H), 6.83 (d, J = 7.6 Hz, 1H), 3.57 (s, 2H). <sup>13</sup>C NMR (126 MHz, CDCl<sub>3</sub>) δ 160.1, 148.3, 141.2, 141.1, 132.3, 129.8, 129.4, 129.2, 128.9, 128.6, 127.0, 126.4, 125.4 (q, *J*<sub>C-F</sub> = 3.8 Hz). 125.3, 125.2, 123.5, 123.0, 122.4, 120.2, 116.0, 35.9. IR (KBr): 2911, 1682, 1575, 1489, 1406, 1340, 1236, 1153,

1102, 837, 757, 706, 623  $\text{cm}^{-1}$ . HRMS (ESI)  $m/z$ : calcd for  $\text{C}_{23}\text{H}_{16}\text{F}_3\text{NO}_2\text{Na}$   $[\text{M}+\text{Na}]^+$  418.1025, found 418.1043.

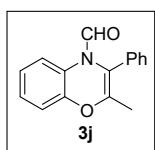

*2-Methyl-3-phenyl-4H-benzo[b][1,4]oxazine-4-carbaldehyde (3j).*

Purification by column chromatography on silica gel (petroleum ether/ethyl acetate = 10:1, v/v) afforded the title compound as a white solid (18 mg, 36% yield). Mp: 93-94  $^{\circ}\text{C}$ .  $^1\text{H}$  NMR (500 MHz,  $\text{CDCl}_3$ )  $\delta$  8.09 (s, 1H), 7.94 (d,  $J = 7.8$  Hz, 1H), 7.46 – 7.40 (m, 2H), 7.37 (d,  $J = 6.3$  Hz, 3H), 7.12 (dd,  $J = 18.6, 7.5$  Hz, 2H), 6.94 (d,  $J = 7.8$  Hz, 1H), 1.91 (s, 3H).  $^{13}\text{C}$  NMR (126 MHz,  $\text{CDCl}_3$ )  $\delta$  160.3, 148.5, 141.0, 133.1, 129.8, 129.2, 128.6, 126.8, 126.5, 123.4, 122.6, 117.9, 116.0, 16.5. IR (KBr): 2913, 1689, 1584, 1491, 1391, 1343, 1299, 1240, 1202, 1163, 1091, 1017, 948, 856, 754, 702, 622.9, 552, 472  $\text{cm}^{-1}$ . HRMS (ESI)  $m/z$ : calcd for  $\text{C}_{16}\text{H}_{13}\text{NO}_2\text{Na}$   $[\text{M}+\text{Na}]^+$  274.0838, found 274.0861.

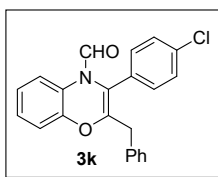

*2-Benzyl-3-(4-chlorophenyl)-4H-benzo[b][1,4]oxazine-4-*

*carbaldehyde (3k).* Purification by column chromatography on silica gel (petroleum ether/ethyl acetate = 10:1, v/v) afforded the title compound as a yellow solid (49 mg, 68% yield). Mp: 99-101

$^{\circ}\text{C}$ .  $^1\text{H}$  NMR (500 MHz,  $\text{CDCl}_3$ )  $\delta$  8.13 (s, 1H), 7.96 (d,  $J = 7.5$  Hz, 1H), 7.45 (d,  $J = 7.3$  Hz, 2H), 7.40 – 7.36 (m, 3H), 7.34 (d,  $J = 9.7$  Hz, 2H), 7.17 – 7.09 (m, 4H), 6.85 (d,  $J = 7.3$  Hz, 1H), 3.49 (s, 2H).  $^{13}\text{C}$  NMR (126 MHz,  $\text{CDCl}_3$ )  $\delta$  160.2, 148.3, 141.5, 139.3, 132.4, 131.5, 130.1, 129.9, 129.4, 129.2, 127.0, 126.4, 123.5, 122.5, 122.4, 120.1, 116.1, 35.7. IR (KBr): 2905, 1688, 1581, 1492, 1415, 1352, 1301, 1233, 1135, 1081, 974, 760, 709  $\text{cm}^{-1}$ . HRMS (ESI)  $m/z$ : calcd for  $\text{C}_{22}\text{H}_{17}\text{ClNO}_2$   $[\text{M}+\text{H}]^+$  362.0942, found 362.0940.

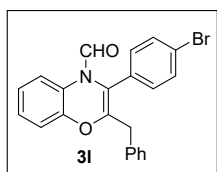

*2-Benzyl-3-(4-bromophenyl)-4H-benzo[b][1,4]oxazine-4-*

*carbaldehyde (3l).* Purification by column chromatography on silica gel (petroleum ether/ethyl acetate = 10:1, v/v) afforded the title compound as a yellow solid (58 mg, 71% yield). Mp: 97-99  $^{\circ}\text{C}$ .  $^1\text{H}$



NMR (500 MHz, CDCl<sub>3</sub>) δ 8.11 (s, 1H), 7.92 (d, J = 6.9 Hz, 1H), 7.57 (d, J = 7.7 Hz, 2H), 7.28 (d, J = 6.3 Hz, 4H), 7.23 (d, J = 6.9 Hz, 1H), 7.18 (d, J = 7.3 Hz, 2H), 7.11 – 7.06 (m, 2H), 6.85 (d, J = 6.9 Hz, 1H), 3.51 (s, 2H). <sup>13</sup>C NMR (126 MHz, CDCl<sub>3</sub>) δ 160.0, 148.4, 143.0, 136.6, 132.6, 131.7, 131.3, 128.6, 128.2, 127.0, 126.8, 126.3, 123.5, 123.2, 122.5, 118.6, 116.1, 36.1. IR (KBr): 2855, 1685, 1584, 1498, 1387, 1295, 1242, 1141, 1069, 1010, 974, 816, 748, 701 cm<sup>-1</sup>. HRMS (ESI) calcd for *m/z*: C<sub>22</sub>H<sub>16</sub>BrNO<sub>2</sub>Na [M+2+Na]<sup>+</sup> 430.0238, found 430.0221.

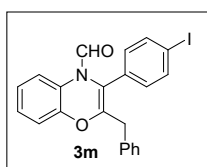

*2-Benzyl-3-(4-iodophenyl)-4H-benzo[b][1,4]oxazine-4-*

*carbaldehyde (3m)*. Purification by column chromatography on silica gel (petroleum ether/ethyl acetate = 10:1, v/v) afforded the title compound as a yellow solid (58 mg, 64% yield). Mp: 139-142 °C.

<sup>1</sup>H NMR (500 MHz, CDCl<sub>3</sub>) δ 8.10 (s, 1H), 7.92 (d, J = 6.9 Hz, 1H), 7.77 (d, J = 7.7 Hz, 2H), 7.28 (d, J = 7.3 Hz, 2H), 7.23 (d, J = 6.9 Hz, 1H), 7.18 (d, J = 7.3 Hz, 2H), 7.14 (d, J = 7.9 Hz, 3H), 7.08 (d, J = 5.9 Hz, 1H), 6.84 (d, J = 6.9 Hz, 1H), 3.51 (s, 2H). <sup>13</sup>C NMR (126 MHz, CDCl<sub>3</sub>) δ 160.0, 148.4, 143.0, 138.5, 136.6, 132.3, 131.4, 128.6, 128.2, 127.0, 126.8, 126.3, 123.5, 122.5, 118.8, 116.1, 94.9, 36.1. IR (KBr): 2905, 1673, 1587, 1483, 1346, 1236, 1290, 1141, 968, 805, 754, 698 cm<sup>-1</sup>. HRMS (ESI) *m/z*: calcd for C<sub>22</sub>H<sub>16</sub>INO<sub>2</sub>Na [M+Na]<sup>+</sup> 476.0117, found 476.0149.

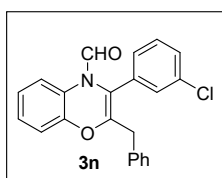

*2-Benzyl-3-(3-chlorophenyl)-4H-benzo[b][1,4]oxazine-4-*

*carbaldehyde (3n)*. Purification by column chromatography on silica gel (petroleum ether/ethyl acetate = 10:1, v/v) afforded the title compound as a yellow solid. (46 mg, 64% yield). Mp: 135-137

°C. <sup>1</sup>H NMR (500 MHz, CDCl<sub>3</sub>) δ 8.10 (s, 1H), 7.92 (d, J = 7.2 Hz, 1H), 7.42 – 7.35 (m, 3H), 7.28 (d, J = 7.6 Hz, 3H), 7.24 – 7.22 (m, 1H), 7.18 (d, J = 7.4 Hz, 2H), 7.10 – 7.06 (m, 2H), 6.84 (d, J = 7.5 Hz, 1H), 3.52 (s, 2H). <sup>13</sup>C NMR (126 MHz, CDCl<sub>3</sub>) δ 160.0, 148.4, 143.4, 136.6, 135.3, 134.6, 131.7, 130.6, 129.7, 129.2, 128.6, 128.3, 128.0, 127.0, 126.8, 123.5, 122.5, 118.4, 116.1, 36.1. IR (KBr): 2902, 1685, 1593, 1486,

1412, 1349, 1296, 1236, 1141, 1084, 983, 879, 751, 698  $\text{cm}^{-1}$ . HRMS (ESI) calcd for  $\text{C}_{22}\text{H}_{16}\text{ClNO}_2\text{Na}$   $m/z$ :  $[\text{M}+\text{Na}]^+$  384.0761, found 384.0761.

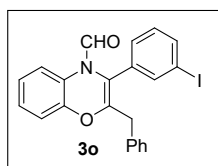

*2-Benzyl-3-(3-iodophenyl)-4H-benzo[b][1,4]oxazine-4-carbaldehyde (3o)*. Purification by column chromatography on silica gel (petroleum ether/ethyl acetate = 10:1, v/v) afforded the title compound as a yellow solid (62 mg, 68% yield). Mp: 140-141  $^{\circ}\text{C}$ .  $^1\text{H}$  NMR (500 MHz,  $\text{CDCl}_3$ )  $\delta$  8.10 (s, 1H), 7.93 (d,  $J = 7.0$  Hz, 1H), 7.77 – 7.69 (m, 2H), 7.36 (d,  $J = 7.6$  Hz, 1H), 7.31 – 7.27 (m, 2H), 7.22 (d,  $J = 7.1$  Hz, 1H), 7.18 (d,  $J = 7.4$  Hz, 2H), 7.14 (d,  $J = 7.7$  Hz, 1H), 7.10 – 7.06 (m, 2H), 6.84 (d,  $J = 7.1$  Hz, 1H), 3.50 (s, 2H).  $^{13}\text{C}$  NMR (126 MHz,  $\text{CDCl}_3$ )  $\delta$  160.0, 148.3, 143.3, 138.4, 138.0, 136.6, 134.8, 130.8, 129.0, 128.6, 128.3, 127.0, 126.7, 126.2, 123.5, 122.4, 118.1, 116.0, 94.8, 36.1. IR (KBr): 2899, 1682, 1593, 1489, 1415, 1346, 1293, 1236, 1144, 1075, 974, 751, 700  $\text{cm}^{-1}$ . HRMS (ESI)  $m/z$ : calcd for  $\text{C}_{22}\text{H}_{16}\text{INO}_2\text{Na}$   $[\text{M}+\text{Na}]^+$  476.0117, found 476.0147.

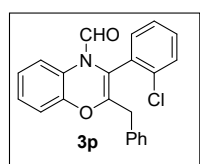

*2-Benzyl-3-(2-chlorophenyl)-4H-benzo[b][1,4]oxazine-4-carbaldehyde (3p)*. Purification by column chromatography on silica gel (petroleum ether/ethyl acetate = 10:1, v/v) afforded the title compound as a yellow solid (29 mg, 40% yield). Mp: 98-100  $^{\circ}\text{C}$ .  $^1\text{H}$  NMR (500 MHz,  $\text{CDCl}_3$ )  $\delta$  8.03 – 8.00 (m, 2H), 7.51 (d,  $J = 7.6$  Hz, 1H), 7.44 – 7.34 (m, 3H), 7.28 – 7.23 (m, 3H), 7.20 (d,  $J = 7.1$  Hz, 1H), 7.13 (d,  $J = 7.2$  Hz, 3H), 7.09 – 7.06 (m, 2H), 6.86 – 6.81 (m, 1H), 3.47 (d,  $J = 15.6$  Hz, 1H), 3.34 (d,  $J = 15.5$  Hz, 1H).  $^{13}\text{C}$  NMR (126 MHz,  $\text{CDCl}_3$ )  $\delta$  158.9, 148.1, 143.8, 136.4, 134.8, 133.2, 130.9, 130.6, 128.5, 128.4, 127.5, 126.8, 126.7, 126.3, 123.6, 122.3, 116.7, 116.1, 36.0. IR (KBr): 2872, 1685, 1593, 1486, 1348, 1301, 1239, 1147, 968, 760, 700  $\text{cm}^{-1}$ . HRMS (ESI)  $m/z$ : calcd for  $\text{C}_{22}\text{H}_{16}\text{ClNO}_2\text{Na}$   $[\text{M}+\text{Na}]^+$  384.0761, found 384.0749.

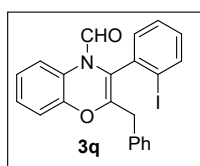

*2-Benzyl-3-(2-iodophenyl)-4H-benzo[b][1,4]oxazine-4-carbaldehyde (3q)*. Purification by column chromatography on silica gel (petroleum ether/ethyl acetate = 10:1, v/v) afforded the title

compound as a yellow solid (24 mg, 26% yield). Mp: 96-99 °C. <sup>1</sup>H NMR (500 MHz, CDCl<sub>3</sub>) δ 8.06 – 7.94 (m, 2H), 7.46 – 7.35 (m, 2H), 7.27 – 7.22 (m, 2H), 7.20 (d, J = 7.0 Hz, 1H), 7.16 – 7.10 (m, 3H), 7.10 – 7.04 (m, 2H), 6.86 – 6.81 (m, 1H), 3.45 (d, J = 15.5 Hz, 1H), 3.31 (d, J = 15.5 Hz, 1H). <sup>13</sup>C NMR (126 MHz, CDCl<sub>3</sub>) δ 158.8, 147.9, 143.2, 140.4, 136.7, 136.2, 133.1, 130.8, 128.8, 128.5, 128.4, 126.8, 126.6, 126.5, 123.5, 122.4, 120.6, 116.1, 100.8, 36.0. IR (KBr): 2872, 1685, 1593, 1486, 1349, 1301, 1239, 1147, 968, 760, 700 cm<sup>-1</sup>. HRMS (ESI) *m/z*: calcd for C<sub>22</sub>H<sub>16</sub>INO<sub>2</sub>Na [M+Na]<sup>+</sup> 476.0117, found 476.0131.

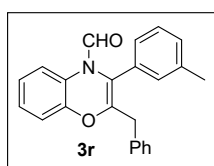

*2-Benzyl-3-(m-tolyl)-4H-benzo[b][1,4]oxazine-4-carbaldehyde*

(**3r**). Purification by column chromatography on silica gel (petroleum ether/ethyl acetate = 10:1, v/v) afforded the title compound as a yellow solid (50 mg, 74% yield). Mp: 113-114 °C. <sup>1</sup>H NMR (500 MHz, CDCl<sub>3</sub>) δ 8.13 (s, 1H), 8.01 – 7.94 (m, 1H), 7.30 – 7.24 (m, 3H), 7.21 – 7.16 (m, 6H), 7.09 – 7.02 (m, 2H), 6.86 – 6.79 (m, 1H), 3.52 (s, 2H), 2.35 (s, 3H). <sup>13</sup>C NMR (126 MHz, CDCl<sub>3</sub>) δ 160.3, 148.5, 142.1, 139.1, 137.1, 132.5, 130.3, 129.7, 129.1, 128.4, 128.3, 127.0, 126.8, 126.6, 123.3, 122.3, 119.7, 116.0, 36.1, 21.3. IR (KBr): 2920, 1685, 1593, 1491, 1414, 1313, 1242, 1158, 1114, 1061, 834, 757, 698 cm<sup>-1</sup>. HRMS (ESI) *m/z*: calcd for C<sub>23</sub>H<sub>20</sub>NO<sub>2</sub> [M+H]<sup>+</sup> 342.1488, found 342.1479.

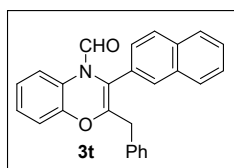

*2-Benzyl-3-(naphthalen-2-yl)-4H-benzo[b][1,4]oxazine-4-*

*carbaldehyde (3t)*. Purification by column chromatography on silica gel (petroleum ether/ethyl acetate = 10:1, v/v) afforded the title compound as a yellow solid (51 mg, 67% yield). Mp: 102-105 °C. <sup>1</sup>H NMR (500 MHz, CDCl<sub>3</sub>) δ 8.16 (s, 1H), 8.00 (d, J = 8.1 Hz, 1H), 7.90 (d, J = 8.4 Hz, 1H), 7.85 (d, J = 9.9 Hz, 2H), 7.81 – 7.77 (m, 1H), 7.57 – 7.49 (m, 2H), 7.47 (d, J = 8.3 Hz, 1H), 7.28 (t, J = 7.4 Hz, 2H), 7.23 – 7.20 (m, 3H), 7.13 – 7.06 (m, 2H), 6.87 (d, J = 8.6 Hz, 1H), 3.59 (s, 2H). <sup>13</sup>C NMR (126 MHz, CDCl<sub>3</sub>) δ 160.2, 148.6, 142.9, 137.1, 133.2, 133.1, 129.9, 129.7, 129.4, 128.5, 128.4, 128.0, 127.8, 127.0, 126.9, 126.7, 126.6, 126.4, 123.4, 122.4, 119.7, 116.1, 36.2. IR (KBr): 2911, 1670,

1587, 1489, 1418, 1346, 1287, 1236, 1132, 1087, 751, 695  $\text{cm}^{-1}$ . HRMS (ESI)  $m/z$ : calcd for  $\text{C}_{26}\text{H}_{19}\text{NO}_2\text{Na}$   $[\text{M}+\text{Na}]^+$  400.1308, found 400.1302.

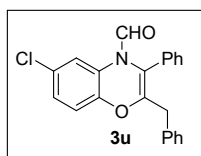

*2-Benzyl-6-chloro-3-phenyl-4H-benzo[b][1,4]oxazine-4-*

*carbaldehyde (3u)*. Purification by column chromatography on silica gel (petroleum ether/ethyl acetate = 10:1, v/v) afforded the title

compound as a yellow solid (40 mg, 52% yield). Mp: 106-108  $^{\circ}\text{C}$ .  $^1\text{H}$  NMR (500 MHz,  $\text{CDCl}_3$ )  $\delta$  8.06 (d,  $J = 50.8$  Hz, 2H), 7.49 – 7.37 (m, 5H), 7.31 – 7.26 (m, 2H), 7.23 (d,  $J = 7.2$  Hz, 1H), 7.16 (d,  $J = 7.2$  Hz, 2H), 7.09 – 7.02 (m, 1H), 6.75 (d,  $J = 8.6$  Hz, 1H), 3.51 (s, 2H).  $^{13}\text{C}$  NMR (126 MHz,  $\text{CDCl}_3$ )  $\delta$  160.1, 147.1, 142.3, 136.7, 132.2, 129.9, 129.5, 129.2, 128.6, 128.3, 127.4, 126.8, 126.7, 122.4, 119.4, 116.9, 36.0. IR (KBr): 2893, 1688, 1590, 1489, 1426, 1352, 1304, 1233, 1129, 1090, 971, 855, 807, 751, 698  $\text{cm}^{-1}$ . HRMS (ESI)  $m/z$ : calcd for  $\text{C}_{22}\text{H}_{17}\text{ClNO}_2$   $[\text{M}+\text{H}]^+$  384.0761, found 384.0729.

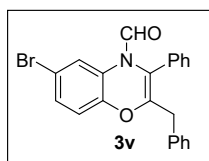

*2-Benzyl-6-bromo-3-phenyl-4H-benzo[b][1,4]oxazine-4-*

*carbaldehyde (3v)*. Purification by column chromatography on silica gel (petroleum ether/ethyl acetate = 10:1, v/v) afforded the title

compound as a yellow solid (46 mg, 57% yield). Mp: 84-86  $^{\circ}\text{C}$ .  $^1\text{H}$  NMR (500 MHz,  $\text{CDCl}_3$ )  $\delta$  8.12 (d,  $J = 26.2$  Hz, 2H), 7.45 – 7.36 (m, 5H), 7.29 – 7.25 (m, 2H), 7.23 – 7.14 (m, 4H), 6.67 (d,  $J = 8.6$  Hz, 1H), 3.49 (s, 2H).  $^{13}\text{C}$  NMR (126 MHz,  $\text{CDCl}_3$ )  $\delta$  159.9, 147.6, 142.2, 136.6, 132.1, 129.8, 129.6, 129.4, 129.2, 128.5, 128.2, 127.6, 126.7, 125.1, 119.4, 117.3, 115.4, 35.9. IR (KBr): 2890, 1682, 1590, 1486, 1423, 1352, 1299, 1230, 1135, 1084, 962, 784, 692  $\text{cm}^{-1}$ . HRMS (ESI)  $m/z$ : calcd for  $\text{C}_{22}\text{H}_{16}\text{BrNO}_2\text{Na}$   $[\text{M}+2+\text{Na}]^+$  430.0238, found 430.0230.

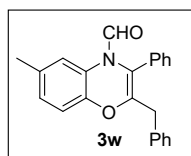

*2-Benzyl-6-methyl-3-phenyl-4H-benzo[b][1,4]oxazine-4-*

*carbaldehyde (3w)*. Purification by column chromatography on silica gel (petroleum ether/ethyl acetate = 10:1, v/v) afforded the title

compound as a yellow solid (42 mg, 62% yield). Mp: 115-117  $^{\circ}\text{C}$ .  $^1\text{H}$  NMR (500 MHz,  $\text{CDCl}_3$ )  $\delta$  8.12 (s, 1H), 7.78 (s, 1H), 7.47 – 7.35 (m, 5H), 7.29 – 7.24 (m, 2H), 7.22 –

7.16 (m, 3H), 6.88 (d,  $J = 7.9$  Hz, 1H), 6.73 (d,  $J = 8.2$  Hz, 1H), 3.51 (s, 2H), 2.32 (s, 3H).  $^{13}\text{C}$  NMR (126 MHz,  $\text{CDCl}_3$ )  $\delta$  160.3, 146.4, 142.6, 137.0, 133.1, 132.8, 129.9, 129.3, 128.9, 128.5, 128.3, 127.3, 126.6, 126.2, 122.7, 119.5, 115.7, 36.1, 20.9. IR (KBr): 2920, 1679, 1599, 1501, 1435, 1355, 1289, 1242, 1131, 1072, 968, 804, 742,  $700\text{ cm}^{-1}$ . HRMS (ESI)  $m/z$ : calcd for  $\text{C}_{23}\text{H}_{20}\text{NO}_2$   $[\text{M}+\text{H}]^+$  342.1488, found 342.1460.

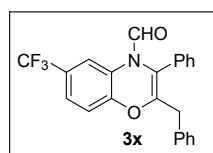

*2-Benzyl-3-phenyl-6-(trifluoromethyl)-4H-benzo[b][1,4]oxazine-4-carbaldehyde (3x)*. Purification by column chromatography on silica gel (petroleum ether/ethyl acetate = 10:1, v/v) afforded the title

compound as a yellow solid (40 mg, 51% yield). Mp: 95-98 °C.  $^1\text{H}$  NMR (500 MHz,  $\text{CDCl}_3$ )  $\delta$  8.29 (s, 1H), 8.14 (s, 1H), 7.46 – 7.39 (m, 5H), 7.34 (d,  $J = 9.3$  Hz, 1H), 7.31 – 7.26 (m, 2H), 7.24 – 7.20 (m, 1H), 7.17 (d,  $J = 7.3$  Hz, 2H), 6.88 (d,  $J = 8.4$  Hz, 1H), 3.52 (s, 2H).  $^{13}\text{C}$  NMR (126 MHz,  $\text{CDCl}_3$ )  $\delta$  160.1, 150.9, 141.9, 136.6, 131.9, 129.8, 129.5, 129.4, 129.1, 128.8, 128.6, 128.4, 128.3, 126.9, 126.8, 124.2 (d,  $J_{\text{C-F}} = 3.4$  Hz), 119.9, 119.8, 116.4, 35.9. IR (KBr): 2893, 1697, 1604, 1503, 1441, 1358, 1319, 1251, 1155, 1120, 962, 828, 757, 695,  $635\text{ cm}^{-1}$ . HRMS (ESI)  $m/z$ : calcd for  $\text{C}_{23}\text{H}_{16}\text{F}_3\text{NO}_2\text{Na}$   $[\text{M}+\text{Na}]^+$  418.1025, found 418.1025.

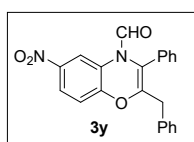

*2-Benzyl-6-nitro-3-phenyl-4H-benzo[b][1,4]oxazine-4-carbaldehyde (3y)*. Purification by column chromatography on silica gel (petroleum ether/ethyl acetate = 10:1, v/v) afforded the title compound as a yellow

solid (24 mg, 32% yield). Mp: 119-122 °C.  $^1\text{H}$  NMR (500 MHz,  $\text{CDCl}_3$ )  $\delta$  8.88 (s, 1H), 8.16 (s, 1H), 8.04 – 7.98 (m, 1H), 7.53 – 7.40 (m, 5H), 7.33 – 7.28 (m, 2H), 7.26 – 7.22 (m, 1H), 7.17 (d,  $J = 7.2$  Hz, 2H), 6.90 (d,  $J = 8.9$  Hz, 1H), 3.53 (s, 2H).  $^{13}\text{C}$  NMR (126 MHz,  $\text{CDCl}_3$ )  $\delta$  159.9, 153.4, 143.4, 141.5, 136.3, 131.3, 129.8, 129.7, 128.7, 128.3, 127.0, 126.7, 123.0, 119.8, 118.4, 116.2, 35.8. IR (KBr): 2845, 1682, 1584, 1528, 1486, 1444, 1343, 1281, 1239, 1141, 1063, 974, 897, 733,  $698\text{ cm}^{-1}$ . HRMS (ESI)  $m/z$ : calcd for  $\text{C}_{22}\text{H}_{16}\text{N}_2\text{O}_4\text{Na}$   $[\text{M}+\text{Na}]^+$  395.1002, found 395.0984.

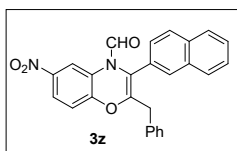

*2-Benzyl-3-(naphthalen-2-yl)-6-nitro-4H-benzo[b][1,4]oxazine-4-carbaldehyde (3z)*. Purification by column chromatography on silica gel (petroleum ether/ethyl acetate = 10:1, v/v) afforded the

title compound as a yellow solid (42 mg, 50% yield). Mp: 90-93 °C. <sup>1</sup>H NMR (500 MHz, CDCl<sub>3</sub>) δ 8.92 (s, 1H), 8.19 (s, 1H), 8.05 – 7.95 (m, 2H), 7.89 (d, J = 7.7 Hz, 2H), 7.86 – 7.82 (m, 1H), 7.63 – 7.53 (m, 2H), 7.50 – 7.44 (m, 1H), 7.33 – 7.28 (m, 2H), 7.25 (d, J = 7.0 Hz, 1H), 7.19 (d, J = 7.1 Hz, 2H), 6.93 (d, J = 8.9 Hz, 1H), 3.60 (s, 2H). <sup>13</sup>C NMR (126 MHz, CDCl<sub>3</sub>) δ 159.94, 153.5, 142.0, 136.4, 133.4, 133.2, 129.9, 129.8, 128.7, 128.3, 128.0, 127.9, 127.5, 127.2, 127.0, 126.0, 123.0, 119.9, 118.4, 116.2, 36.0. IR (KBr): 2914, 1688, 1584, 1518, 1482, 1340, 1242, 1126, 1063, 819, 742, 695 cm<sup>-1</sup>. HRMS (ESI) *m/z*: calcd for C<sub>26</sub>H<sub>18</sub>N<sub>2</sub>O<sub>4</sub>Na [M+Na]<sup>+</sup> 445.1158, found 445.1158.

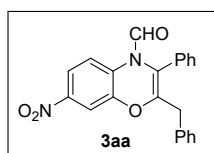

*2-Benzyl-7-nitro-3-phenyl-4H-benzo[b][1,4]oxazine-4-carbaldehyde (3aa)*. Purification by column chromatography on silica gel (petroleum ether/ethyl acetate = 10:1, v/v) afforded the

title compound as a yellow solid (55 mg, 74% yield). Mp: 174-176 °C. <sup>1</sup>H NMR (500 MHz, CDCl<sub>3</sub>) δ 8.20 – 8.10 (m, 2H), 7.96 – 7.91 (m, 1H), 7.66 (d, J = 1.9 Hz, 1H), 7.51 – 7.44 (m, 3H), 7.44 – 7.40 (m, 2H), 7.33 – 7.28 (m, 2H), 7.27 – 7.22 (m, 1H), 7.17 (d, J = 7.1 Hz, 2H), 3.52 (s, 2H). <sup>13</sup>C NMR (126 MHz, CDCl<sub>3</sub>) δ 160.1, 148.5, 145.7, 142.0, 136.2, 132.4, 131.4, 129.8, 129.7, 128.7, 128.3, 127.0, 122.3, 119.3, 119.1, 111.5, 35.8. IR (KBr): 2922, 1685, 1596, 1506, 1435, 1337, 1278, 1227, 1138, 1087, 885, 757, 695 cm<sup>-1</sup>. HRMS (ESI) *m/z*: calcd for C<sub>22</sub>H<sub>16</sub>N<sub>2</sub>O<sub>4</sub>Na [M+Na]<sup>+</sup> 395.1002, found 395.0983.

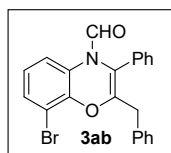

*2-Benzyl-8-bromo-3-phenyl-4H-benzo[b][1,4]oxazine-4-carbaldehyde (3ab)*. Purification by column chromatography on silica gel (petroleum ether/ethyl acetate = 10:1, v/v) afforded the title compound as a yellow

solid (46 mg, 57% yield). Mp: 111-113 °C. <sup>1</sup>H NMR (500 MHz, CDCl<sub>3</sub>) δ 8.11 (s, 1H), 7.86 (d, J = 7.9 Hz, 1H), 7.47 – 7.39 (m, 5H), 7.32 – 7.21 (m, 6H), 6.93 (s, 1H), 3.54 (s, 2H). <sup>13</sup>C NMR (126 MHz, CDCl<sub>3</sub>) δ 160.2, 145.9, 143.0, 136.6, 132.1, 130.3, 129.9, 129.4, 129.2, 128.7, 128.5, 127.6, 126.8, 123.9, 121.5, 119.6, 109.6, 36.0. IR (KBr):

2908, 1688, 1581, 1465, 1346, 1266, 1221, 1105, 968, 754, 698  $\text{cm}^{-1}$ . HRMS (ESI)  $m/z$ :  
calcd for  $\text{C}_{22}\text{H}_{16}\text{BrNO}_2\text{Na}$   $[\text{M}+2+\text{Na}]^+$  430.0238, found 430.0279.

## 5. Scale-up Reaction and Derivatizations

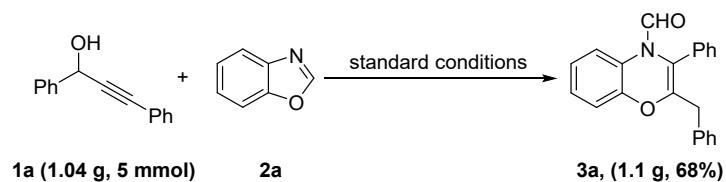

**Scheme S4**

**Scale-up reaction:** Compound **1a** (5.0 mmol, 1.04 g, 1.0 equiv), **2a** (7.5 mmol, 893 mg, 1.5 equiv), Y(OTf)<sub>3</sub> (0.5 mmol, 268 mg) and Et<sub>3</sub>N (15.0 mmol, 1.5 g) were added to a sealed tube, and toluene (50.0 mL) was added via syringe under an air atmosphere. The reaction mixture was stirred at 80 °C until completion (monitored by TLC). After cooling at room temperature, the mixture was concentrated under reduced pressure. The residue was purified on a silica gel column (petroleum ether/ethyl acetate = 10: 1, v/v) to afford the product **3aa** (1.1 g, 68%) (Scheme S4).

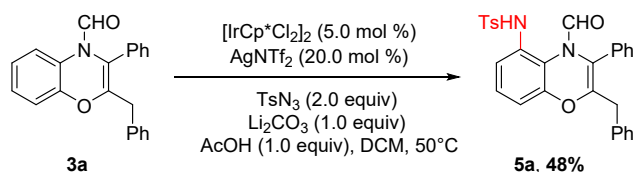

**Scheme S5**

To a round bottom flask was added **3a** (0.15 mmol, 49 mg, 1.0 equiv), TsN<sub>3</sub> (0.3 mmol, 59 mg, 2.0 equiv), [IrCp\*Cl<sub>2</sub>]<sub>2</sub> (5.0 mol %, 6 mg), AgNTf<sub>2</sub> (20.0 mol %, 11.6 mg) Li<sub>2</sub>CO<sub>3</sub> (0.15 mmol, 11 mg, 1.0 equiv) and AcOH (0.15 mmol, 9 mg, 1.0 equiv) in open atmosphere in DCM (2.0 mL). Then, the reaction mixture was refluxed at 50 °C in an oil bath for 5 h. After the completion of the reaction, the reaction mixture was cooled to room temperature, and diluted with 50% EtOAc/hexane (5 mL), passed through a short silica gel (100-200 mesh size) bed, and washed with 50% EtOAc/hexane. The combined organic layer was concentrated under reduced pressure. The crude product was purified by silica gel column chromatography (petroleum ether/ethyl acetate = 5:1, v/v) to give the corresponding product **5a** as a yellow solid (Scheme S5).



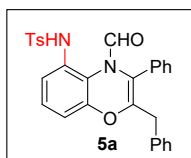

*N*-(2-benzyl-4-formyl-3-phenyl-4*H*-benzo[*b*][1,4]oxazin-5-yl)-4-methylbenzenesulfonamide (**5a**). Purification by column chromatography on silica gel (petroleum ether/ethyl acetate = 5:1,

v/v) afforded the title compound as a yellow solid (36 mg, 48%

yield). Mp: 75-76 °C. <sup>1</sup>H NMR (500 MHz, CDCl<sub>3</sub>) δ 8.01 (s, 1H), 7.91 (s, 1H), 7.69 (d, J = 8.3 Hz, 2H), 7.34 (d, J = 7.3 Hz, 3H), 7.31 – 7.21 (m, 5H), 7.18 (d, J = 8.1 Hz, 1H), 7.16 – 7.11 (m, 3H), 6.99 (d, J = 6.2 Hz, 2H), 6.76 – 6.72 (m, 1H), 3.62 (s, 2H), 2.40 (s, 3H). <sup>13</sup>C NMR (126 MHz, CDCl<sub>3</sub>) δ 162.5, 151.7, 145.8, 143.6, 138.1, 136.4, 132.6, 130.1, 129.6, 129.2, 129.1, 129.0, 128.6, 128.2, 128.1, 126.9, 126.8, 121.2, 121.1, 114.0, 36.0, 21.5. IR (KBr): 2917, 1670, 1593, 1483, 1349, 1284, 1239, 1153, 1093, 1024, 813, 703, 659 cm<sup>-1</sup>. HRMS (ESI) *m/z*: calcd for C<sub>29</sub>H<sub>24</sub>N<sub>2</sub>O<sub>4</sub>SNa [M+Na]<sup>+</sup> 519.1348, found 519.1339.

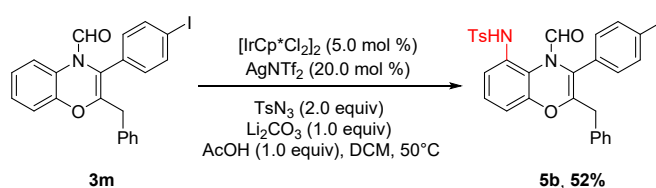

**Scheme S6**

To a round bottom flask was added **3m** (0.15 mmol, 68 mg, 1.0 equiv), TsN<sub>3</sub> (0.3 mmol, 59 mg, 2.0 equiv), [IrCp\*Cl<sub>2</sub>]<sub>2</sub> (5.0 mol %, 6 mg), AgNTf<sub>2</sub> (20.0 mol %, 11.6 mg) Li<sub>2</sub>CO<sub>3</sub> (0.15 mmol, 11 mg, 1.0 equiv) and AcOH (0.15 mmol, 9 mg, 1.0 equiv) in open atmosphere in DCM (2.0 mL). Then, the reaction mixture was refluxed at 50 °C in an oil bath for 5 h. After the completion of the reaction, the reaction mixture was cooled to room temperature, and diluted with 50% EtOAc/hexane (5 mL), passed through a short silica gel (100-200 mesh size) bed, and washed with 50% EtOAc/hexane. The combined organic layer was concentrated under reduced pressure. The crude product was purified by silica gel column chromatography (petroleum ether/ethyl acetate = 5:1, v/v) to give the corresponding product **5b** as a yellow solid (Scheme S6).

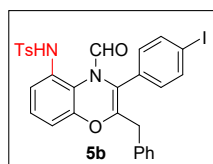

*N*-(2-benzyl-4-(4-iodophenyl)-3-phenyl-4*H*-benzo[*b*][1,4]oxazin-

5-yl)-4-methylbenzenesulfonamide (**5b**). Purification by column chromatography on silica gel (petroleum ether/ethyl acetate = 5:1, v/v) afforded the title compound as a yellow solid (49 mg, 52% yield). Mp: 93-95 °C. <sup>1</sup>H NMR (500 MHz, CDCl<sub>3</sub>) δ 8.01 (s, 1H), 7.80 (s, 1H), 7.74 – 7.67 (m, 4H), 7.34 – 7.25 (m, 5H), 7.19 – 7.08 (m, 4H), 6.84 – 6.74 (m, 3H), 3.62 (s, 2H), 2.43 (s, 3H). <sup>13</sup>C NMR (126 MHz, CDCl<sub>3</sub>) δ 162.3, 151.6, 146.5, 143.7, 138.5, 138.1, 136.2, 132.3, 130.8, 130.1, 129.7, 128.7, 128.2, 127.0, 121.7, 121.5, 121.2, 120.3, 114.3, 95.1, 36.2, 21.3. IR (KBr): 2915, 1670, 1590, 1482, 1352, 1242, 1162, 1099, 1021, 811, 698, 662, 549 cm<sup>-1</sup>. HRMS (ESI) *m/z*: calcd for C<sub>29</sub>H<sub>23</sub>IN<sub>2</sub>O<sub>4</sub>SNa [M+Na]<sup>+</sup> 645.0315, found 645.0340.

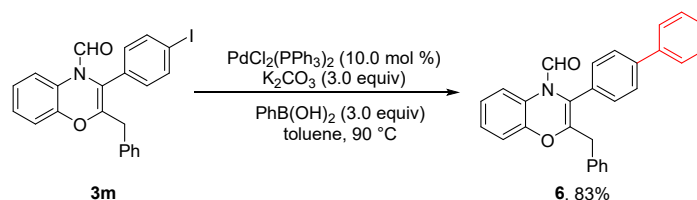

**Scheme S7**

To a solution of **3m** (0.1 mmol, 1.0 equiv, 45 mg), phenylboronic acid (0.3 mmol, 3.0 equiv, 37 mg) and K<sub>2</sub>CO<sub>3</sub> (0.3 mmol, 42 mg, 3.0 equiv) in toluene (2.0 mL) was added PdCl<sub>2</sub>(PPh<sub>3</sub>)<sub>2</sub> (7 mg, 10.0 mol%). The resulting mixture was then heated under a nitrogen atmosphere at 90 °C. in an oil bath for 1 h. After the completion of the reaction, the mixture was cooled to room temperature, and the solid was removed by filtration. Then the filtrate was concentrated under reduced pressure and the residue was purified by column chromatography (petroleum ether/ethyl acetate = 10:1, v/v) on silica gel to provide the desired product **6** as yellow solid (Scheme S7).

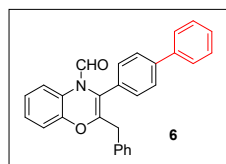

3-([1,1'-Biphenyl]-4-yl)-2-benzyl-4H-benzo[b][1,4]oxazine-4-carbaldehyde (**6**). Purification by column chromatography on silica gel (petroleum ether/ethyl acetate = 10:1, v/v) afforded the title compound as a yellow solid (34 mg, 83% yield). Mp: 156-158 °C. <sup>1</sup>H NMR (500 MHz, CDCl<sub>3</sub>) δ 8.21 (s, 1H), 7.97 (d, J = 7.2 Hz, 1H), 7.66 (d, J = 7.9 Hz, 2H), 7.60 (d, J = 7.4 Hz, 2H), 7.47 (d, J = 8.2 Hz, 4H), 7.40 – 7.36 (m, 1H), 7.32 – 7.28 (m, 2H), 7.25 –

7.22 (m, 3H), 7.12 – 7.07 (m, 2H), 6.86 (d,  $J = 7.3$  Hz, 1H), 3.59 (s, 2H).  $^{13}\text{C}$  NMR (126 MHz,  $\text{CDCl}_3$ )  $\delta$  160.4, 148.6, 142.6, 141.8, 140.0, 137.0, 131.5, 130.2, 129.5, 128.9, 128.6, 128.3, 128.0, 127.8, 127.0, 126.9, 126.7, 123.4, 122.5, 119.5, 116.1, 115.3, 36.2. IR (KBr): 2902, 1682, 1587, 1489, 1355, 1292, 1236, 1137, 968, 762, 698  $\text{cm}^{-1}$ . HRMS (ESI)  $m/z$ : calcd for  $\text{C}_{28}\text{H}_{22}\text{NO}_2$   $[\text{M}+\text{H}]^+$  404.1645, found 404.1647.

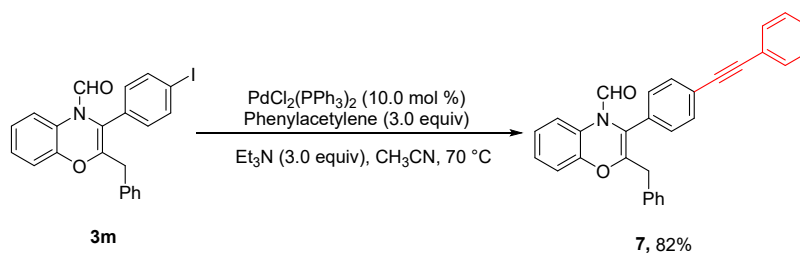

### Scheme S8

To a solution of **3m** (0.1 mmol, 1.0 equiv, 45 mg), phenyl acetylene (0.3 mmol, 3.0 equiv) and  $\text{Et}_3\text{N}$  (0.3 mmol, 31 mg, 3.0 equiv) in MeCN (2.0 mL) was added  $\text{PdCl}_2(\text{PPh}_3)_2$  (10 % mol, 7 mg). The resulting mixture was then heated under a nitrogen atmosphere at 70 °C in an oil bath for 1 h. After the completion of the reaction, the mixture was cooled to room temperature, and the solid was removed by filtration. Then the filtrate was concentrated under reduced pressure and the residue was purified by column chromatography (petroleum ether/ethyl acetate = 10:1, v/v) on silica gel to provide the desired product **7** as yellow solid (Scheme S8).

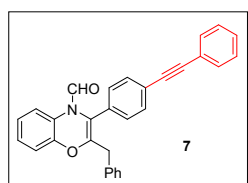

*2-Benzyl-3-(4-(phenylethynyl)phenyl)-4H-benzo[b][1,4]oxazine-4-carbaldehyde (7)*. Purification by column chromatography on silica gel (petroleum ether/ethyl acetate = 10:1, v/v) afforded the title compound as a yellow solid

(35 mg, 82% yield). Mp: 139-141 °C.  $^1\text{H}$  NMR (500 MHz,  $\text{CDCl}_3$ )  $\delta$  8.14 (s, 1H), 7.94 (d,  $J = 6.9$  Hz, 1H), 7.59 (d,  $J = 7.7$  Hz, 2H), 7.54 (d,  $J = 4.2$  Hz, 2H), 7.40 – 7.33 (m, 5H), 7.28 (d,  $J = 7.3$  Hz, 2H), 7.23 (d,  $J = 6.5$  Hz, 1H), 7.20 (d,  $J = 7.7$  Hz, 2H), 7.07 (d,  $J = 11.8$  Hz, 2H), 6.85 (d,  $J = 6.9$  Hz, 1H), 3.55 (s, 2H).  $^{13}\text{C}$  NMR (126 MHz,  $\text{CDCl}_3$ )  $\delta$  160.2, 148.5, 143.1, 136.8, 132.4, 131.6, 129.7, 128.6, 128.4, 128.3, 126.9, 126.7,

126.4, 124.1, 123.5, 122.8, 122.5, 119.2, 116.1, 91.0, 88.5, 36.2. IR (KBr): 2908, 1679, 1590, 1488, 1355, 1293, 1236, 1143, 965, 831, 757, 688  $\text{cm}^{-1}$ . HRMS (ESI)  $m/z$ : calcd for  $\text{C}_{30}\text{H}_{22}\text{NO}_2$   $[\text{M}+\text{H}]^+$  428.1645, found 428.1666.

## 6. Control Experiments

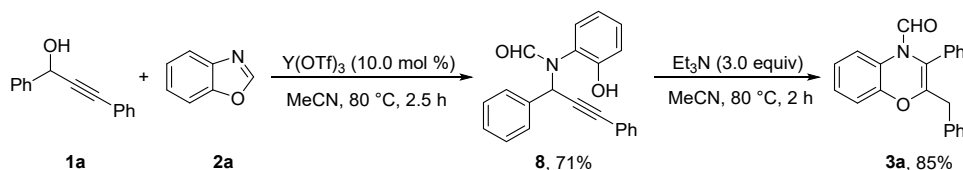

**Scheme S9**

$\text{Y}(\text{OTf})_3$  (11 mg, 10 mol %) was added to a solution of the benzoxazole (1.5 equiv, 0.3 mmol, 36 mg) and propargylic alcohol (1.0 equiv, 0.2 mmol, 42 mg) in MeCN (2.0 mL) under an air atmosphere. The resulting mixture was heated at 80 °C in an oil bath for 2.5 h. After the completion of the reaction, the mixture was cooled to room temperature. The solvent was removed under vacuum, and the residue was purified by column chromatography (petroleum ether/ethyl acetate = 5:1, v/v) on silica gel to provide the desired product **8** as white solid (71%, 47 mg).

To a round bottom flask was added **8** (0.1 mmol, 33 mg, 1.0 equiv) and  $\text{Et}_3\text{N}$  (0.3 in open atmosphere in MeCN (2.0 mL). Then, the resulting mixture was heated at 80 °C in an oil bath for 2 h. After the completion of the reaction, the mixture was cooled to room temperature. The solvent was removed under vacuum, and the residue was purified by column chromatography (petroleum ether/ethyl acetate = 20:1, v/v) on silica gel to provide the desired product **3a** as yellow solid (85%, 28 mg) (Scheme S9).[3]

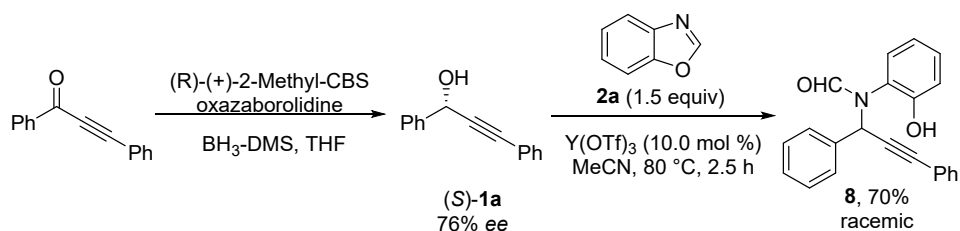

**Scheme S10**

(R)-(+)-2-Methyl-CBS-oxazaborolidine (5.0 mol%) was taken in a clean and dry round bottom flask. High vacuum was applied and released under nitrogen atmosphere. The flask was fitted with clean septa and nitrogen balloon. Dry THF (10 mL, for 1.0

mmol of alkynyl ketone) was added to the flask and cooled to 0 °C. Then BH<sub>3</sub>-DMS (1.1 equiv) was added via a syringe dropwise and allowed to stir for 20 min at 0 °C. Alkynyl ketone (1.0 equiv) in 10 mL dry THF was added dropwise at 0 °C and allowed the reaction to stir for less than 20 min at 0 °C. The reaction was quenched with methanol. The solvent was removed under vacuum, and the residue was purified by column chromatography (petroleum ether/ethyl acetate = 20:1, v/v) on silica gel to provide the desired product (*S*)-**1a** as yellow oil (60%, 125 mg, 76% *ee*).<sup>[4]</sup> The *ee* was measured by HPLC (Chiralpak OD column, hexane/2-propanol = 90/10, flow rate = 1.0 mL/min, λ = 254 nm).

Y(OTf)<sub>3</sub> (11 mg, 10 mol %) was added to a solution of the benzoxazole (1.5 equiv, 0.3 mmol, 36 mg) and (*S*)-**1a** (1.0 equiv, 0.2 mmol, 42 mg) in MeCN (2.0 mL) under an air atmosphere. The resulting mixture was heated at 80 °C in an oil bath for 2.5 h. After the completion of the reaction, the mixture was cooled to room temperature. The solvent was removed under vacuum, and the residue was purified by column chromatography (petroleum ether/ethyl acetate = 5:1, v/v) on silica gel to provide the racemic product **8** as white solid (70%, 45 mg) (Scheme S10). The *ee* was measured by HPLC (Chiralpak IA column, hexane/2-propanol = 90/10, flow rate = 0.8 mL/min, λ = 254 nm).

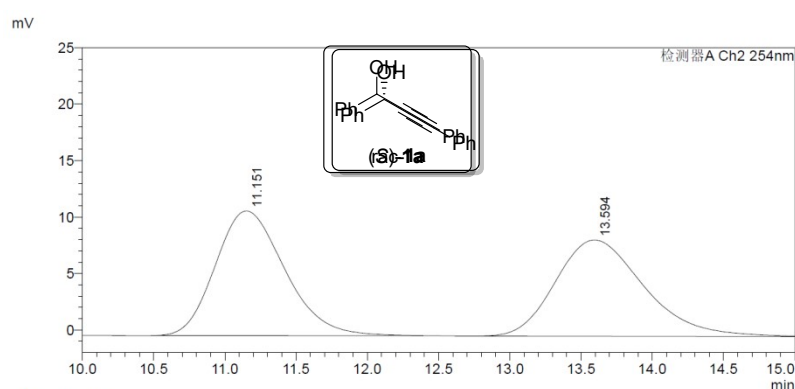

<Peak Table>

| Peak# | Ret. Time | Area   | Height | Area%   |
|-------|-----------|--------|--------|---------|
| 1     | 11.151    | 373918 | 11041  | 50.247  |
| 2     | 13.594    | 370244 | 8533   | 49.753  |
| 总计    |           | 744161 | 19574  | 100.000 |

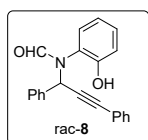



## 7. X-Ray Analysis Data of Single Crystal 3a and 3j

The crystal of products **3a** and **3j** were obtained by slow evaporation in *n*-hexane and dichloromethane. The single crystal X-ray analysis determined the structure of products **3a** and **3j** (Figure S1) as expected.

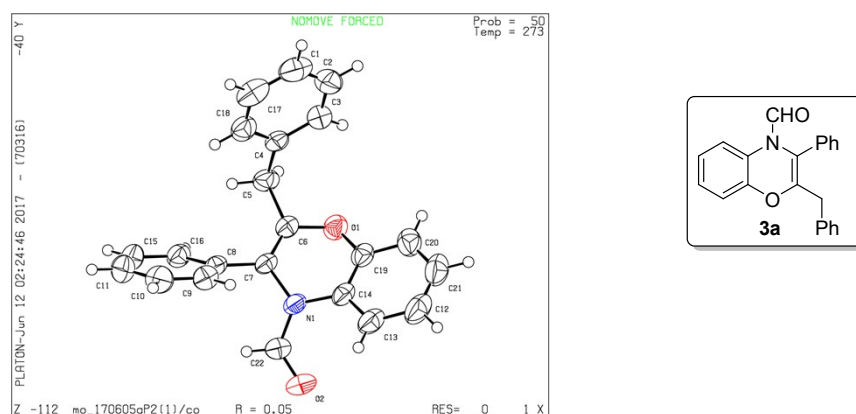

**Figure S1. X-ray structure of 3a. Thermal ellipsoids shown at 50% probability.**

|                |                                       |
|----------------|---------------------------------------|
| Bond precision | C-C = 0.0023 Å                        |
| Wavelength     | 0.71073                               |
| Cell           | a=9.6932(5) b=10.1353(5) c=18.2929(8) |
| Temperature    | 273 K                                 |

|                        | Calculated   | Reported     |
|------------------------|--------------|--------------|
| Volume                 | 1707.69(15)  | 1707.69(14)  |
| Space group            | P 21/c       | P2(1)/c      |
| Hall group             | -P 2ybc      | ?            |
| Moiety formula         | C22 H17 N O2 | ?            |
| Sum formula            | C22 H17 N O2 | C22 H17 N O2 |
| Mr                     | 327.37       | 327.37       |
| Dx, g cm <sup>-3</sup> | 1.273        | 1.273        |
| Z                      | 4            | 4            |
| Mu (mm <sup>-1</sup> ) | 0.082        | 0.082        |
| F000                   | 688.0        | 688.0        |
| F000'                  | 688.30       | -            |
| h, k, lmax             | 12, 13, 24   | 12, 13, 24   |



|                                          |                           |                                                |
|------------------------------------------|---------------------------|------------------------------------------------|
| Nref                                     | 4267                      | 4245                                           |
| Tmin, Tmax                               | -                         | 0.688, 0.746                                   |
| Tmin'                                    |                           |                                                |
| Correction method= # Reported T Limits : | Tmin = 0.688 Tmax = 0.746 |                                                |
| Data completeness = 0.995                |                           | Theta(max) = 28.360                            |
| R(reflections) = 0.0466 ( 3244)          |                           | wR <sub>2</sub> (reflections) = 0.1235 ( 4245) |
| S = 1.020                                |                           | Npar= 226                                      |

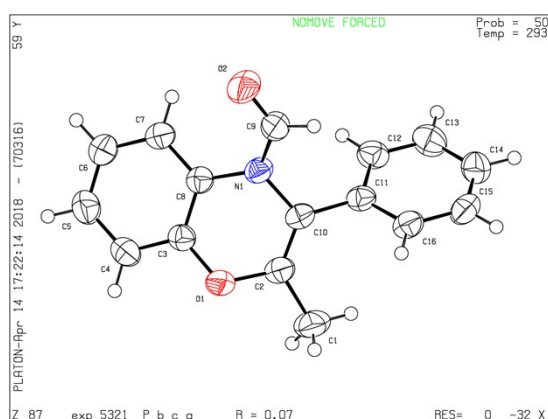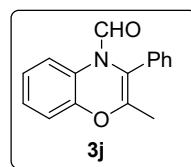

**Figure S2. X-ray structure of 3j. Thermal ellipsoids shown at 50% probability.**

|                                     |                                                  |                                                  |
|-------------------------------------|--------------------------------------------------|--------------------------------------------------|
| Bond precision                      | C-C = 0.0044 Å                                   |                                                  |
| Wavelength                          | 0.71073                                          |                                                  |
| Cell                                | a=18.0493(10) b=8.6789(6) c=16.1121(11)          |                                                  |
| Temperature                         | 293 K                                            |                                                  |
|                                     | Calculated                                       | Reported                                         |
| Volume                              | 2523.9 (3)                                       | 1707.69 (14)                                     |
| Space group                         | P b c a                                          | P b c a                                          |
| Hall group                          | -P 2ac 2ab                                       | -P 2ac 2ab                                       |
| Moiety formula                      | C <sub>16</sub> H <sub>13</sub> N O <sub>2</sub> | C <sub>16</sub> H <sub>13</sub> N O <sub>2</sub> |
| Sum formula                         | C <sub>16</sub> H <sub>13</sub> N O <sub>2</sub> | C <sub>16</sub> H <sub>13</sub> N O <sub>2</sub> |
| Mr                                  | 251.27                                           | 251.27                                           |
| D <sub>x</sub> , g cm <sup>-3</sup> | 1.323                                            | 1.323                                            |
| Z                                   | 8                                                | 8                                                |

|                                                                    |              |                                                |
|--------------------------------------------------------------------|--------------|------------------------------------------------|
| Mu (mm <sup>-1</sup> )                                             | 0.088        | 0.088                                          |
| F000                                                               | 1056.0       | 1056.0                                         |
| F000'                                                              | 1056.48      |                                                |
| h, k, lmax                                                         | 23, 11, 20   | 23, 11, 20                                     |
| Nref                                                               | 2748         | 2702                                           |
| Tmin, Tmax                                                         | 0.981, 0.982 | 0.661, 1.000                                   |
| Tmin'                                                              | 0,981        |                                                |
| Correction method= # Reported T Limits : Tmin = 0.661 Tmax = 1.000 |              |                                                |
| Data completeness = 0.983                                          |              | Theta(max) = 26.989                            |
| R(reflections) = 0.0720 ( 2039)                                    |              | wR <sub>2</sub> (reflections) = 0.1564 ( 2702) |
| S = 1.164                                                          |              | Npar = 173                                     |

## 8. References

1. S. Chen, F. Yuan, H. Zhao and B. Li, *Res. Chem. Intermed.*, 2013, **39**, 2391-2399.
2. S. González-Granda, D. Méndez-Sánchez, I. Lavandera and V. Gotor-Fernández, *ChemCatChem*, 2020, **12**, 520-527.
3. W. Liu, Y. Sun, H. Zhao, B. Li and S. Chen, *ChemCatChem*, 2016, **8**, 2894-2897.
4. N. Naveen, S. R. Koppolu and R. Balamurugan. *Adv. Synth. Catal.*, 2015, **357**, 1463-1473.

## 9. $^1\text{H}$ and $^{13}\text{C}$ NMR Spectra

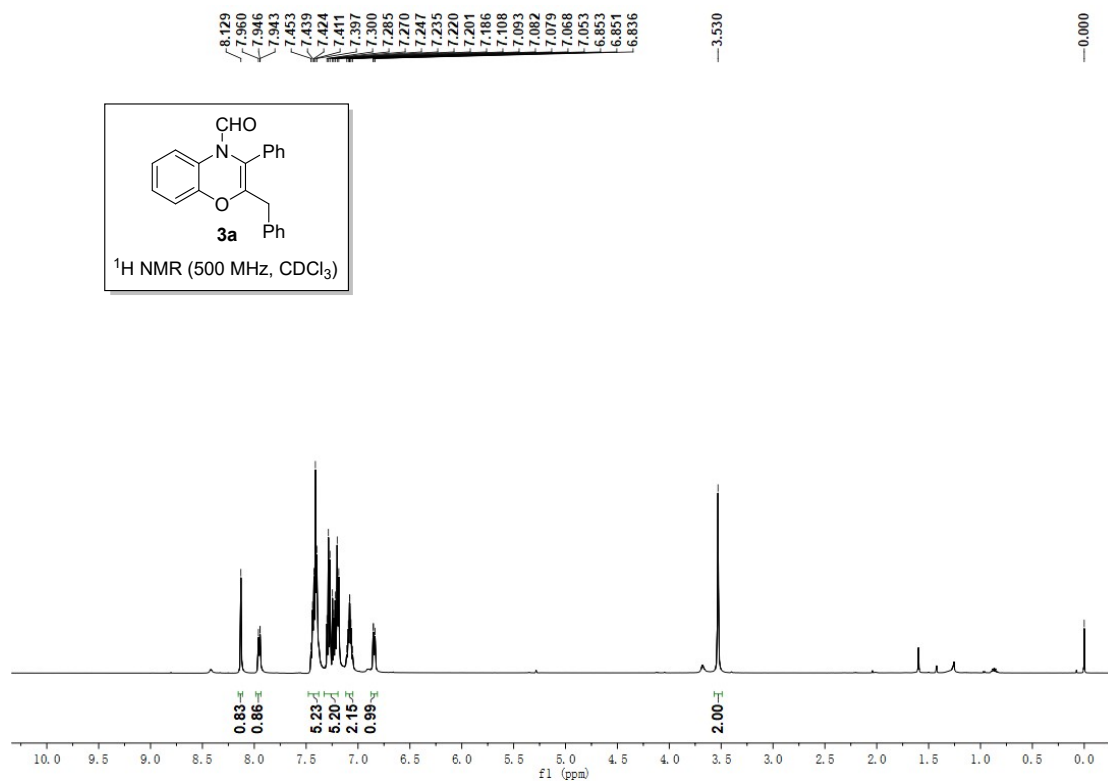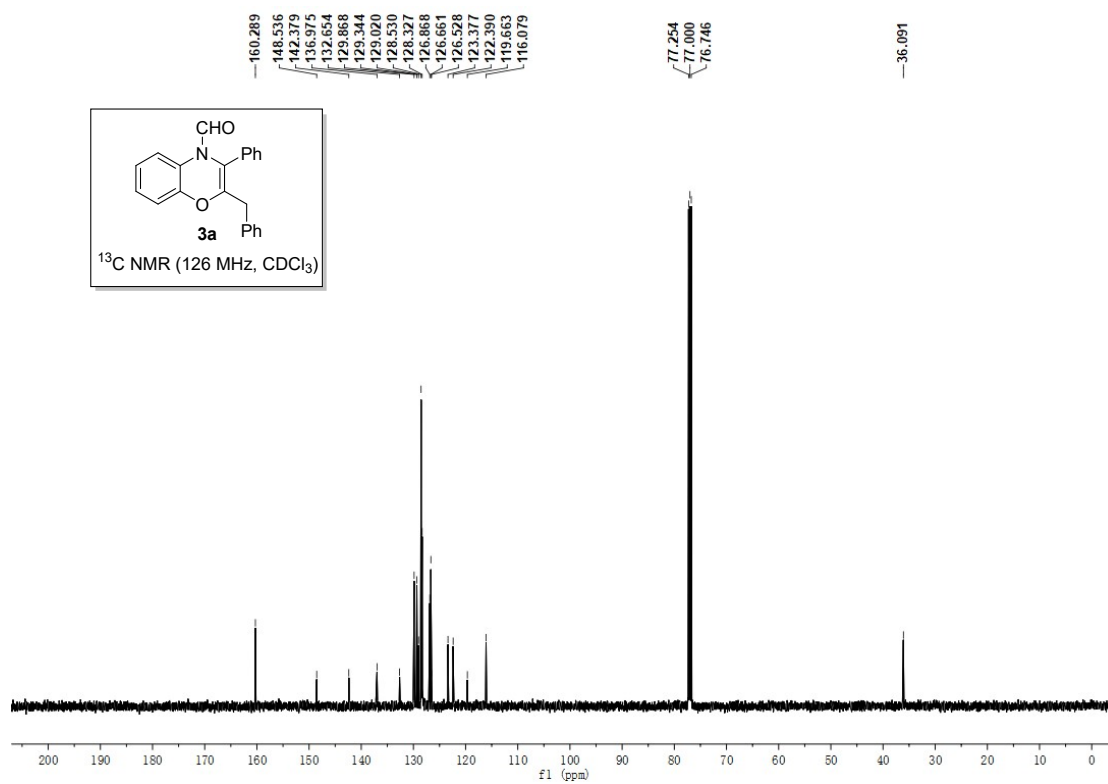

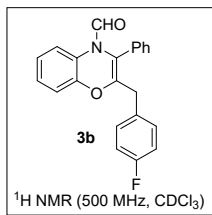

8.122  
 7.965  
 7.951  
 7.456  
 7.442  
 7.428  
 7.407  
 7.396  
 7.381  
 7.238  
 7.139  
 7.124  
 7.112  
 7.090  
 7.078  
 7.065  
 7.050  
 6.971  
 6.953  
 6.936  
 6.935  
 6.921

3.483

0.000

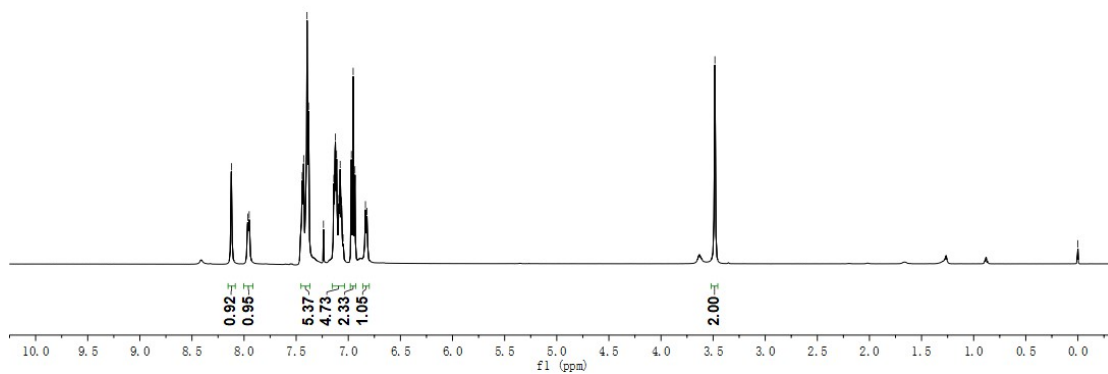

162.661  
 160.714  
 160.180  
 148.418  
 142.150  
 132.590  
 132.491  
 129.835  
 129.754  
 129.374  
 129.086  
 128.875  
 123.484  
 122.392  
 119.663  
 115.973  
 115.386  
 115.217

77.254  
77.000  
76.745

35.267

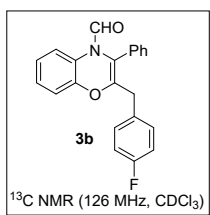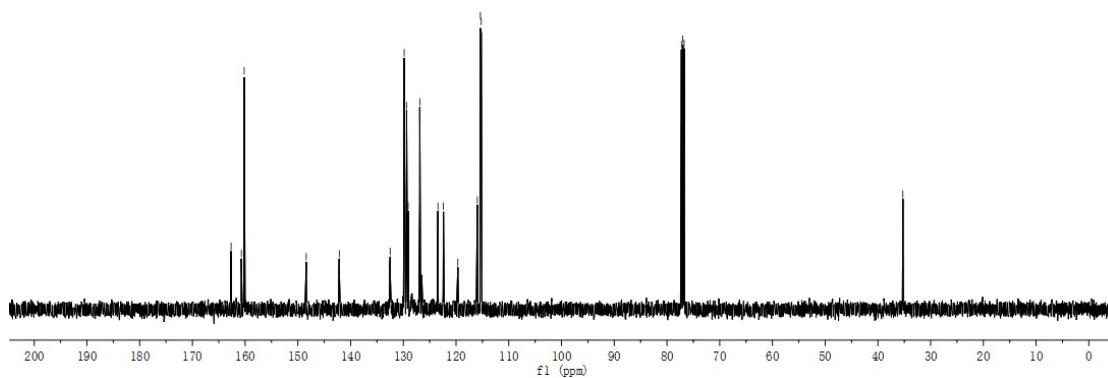

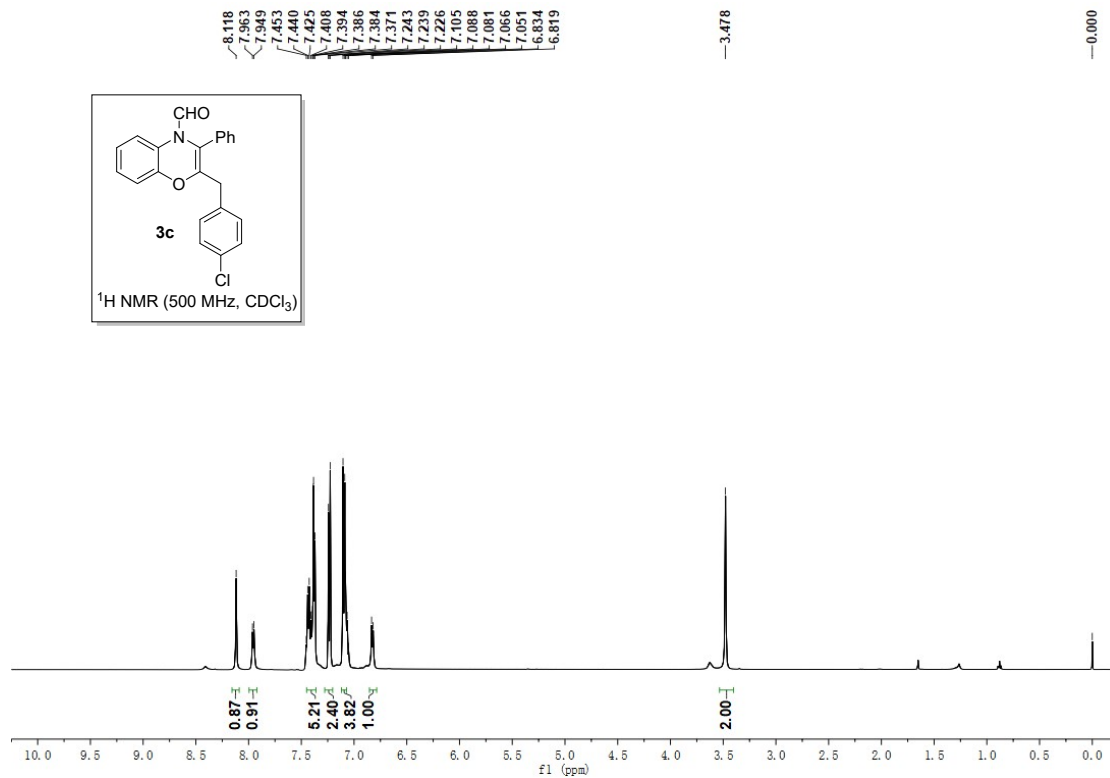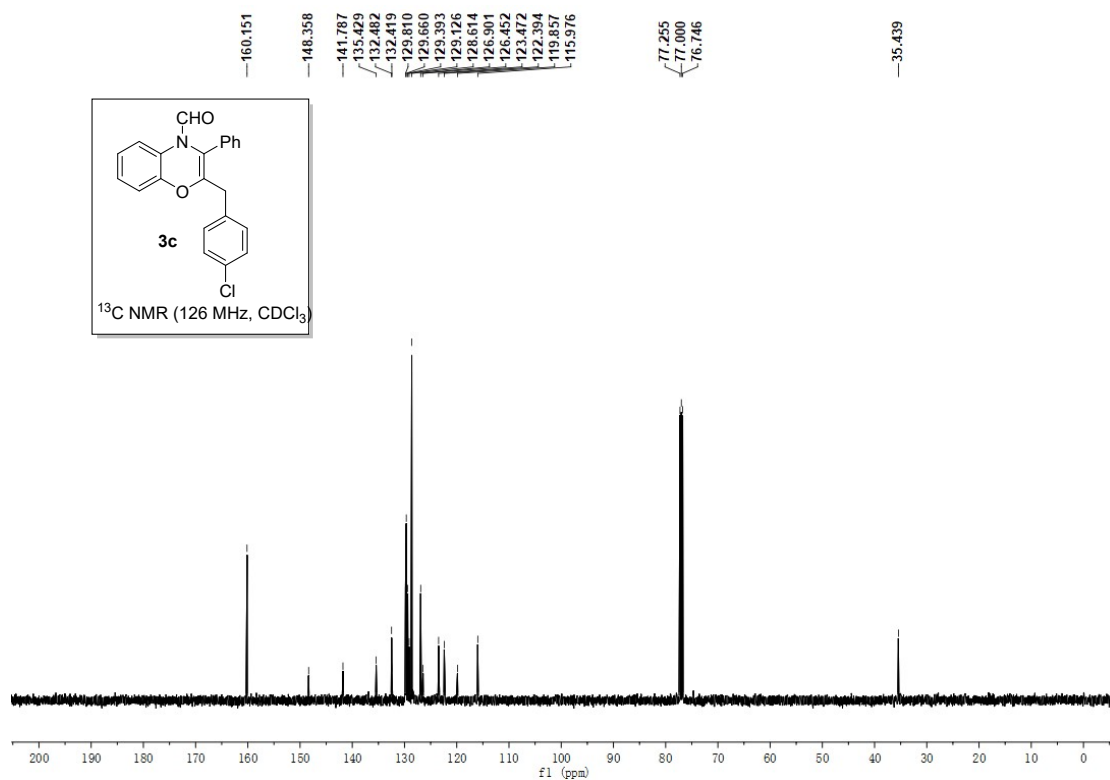

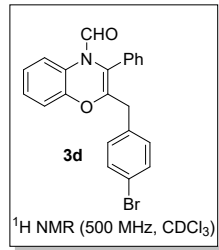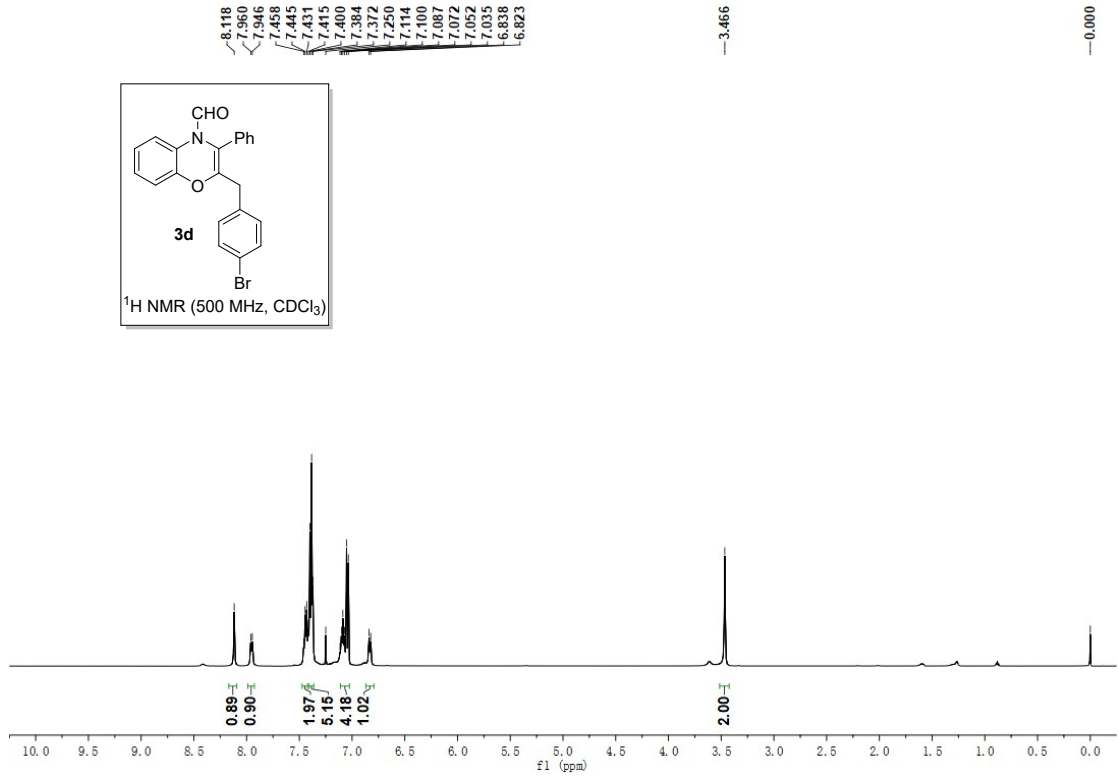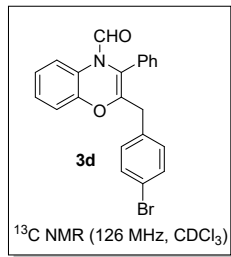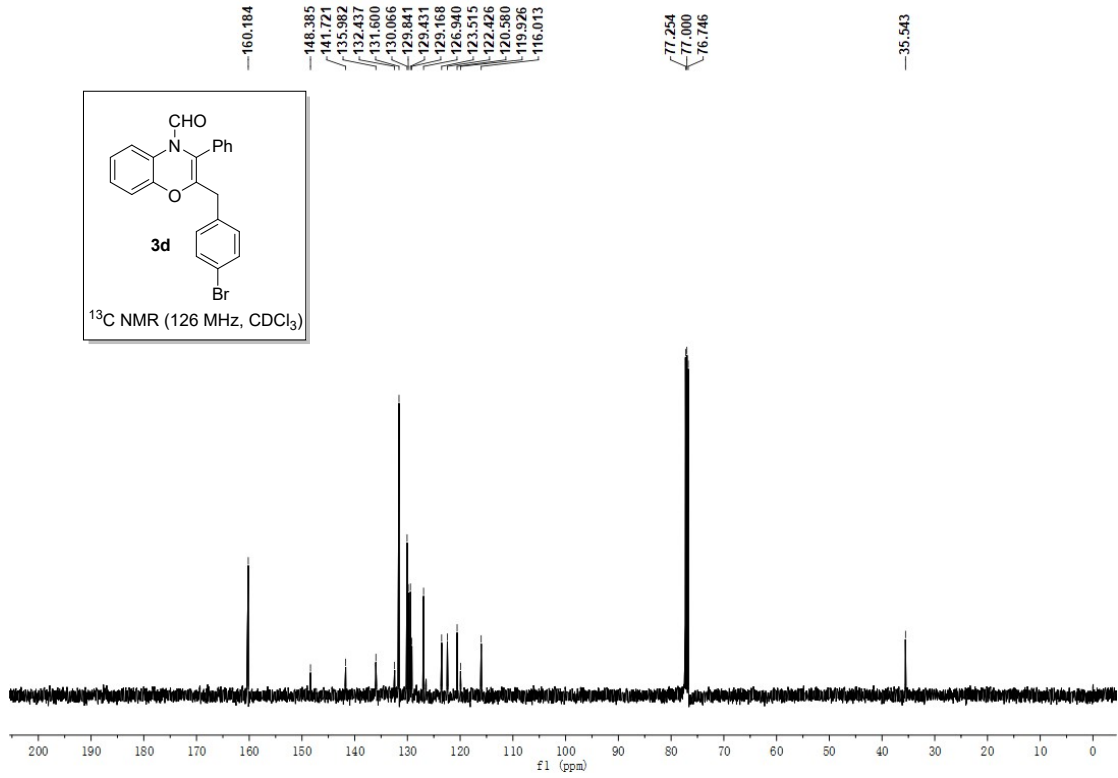

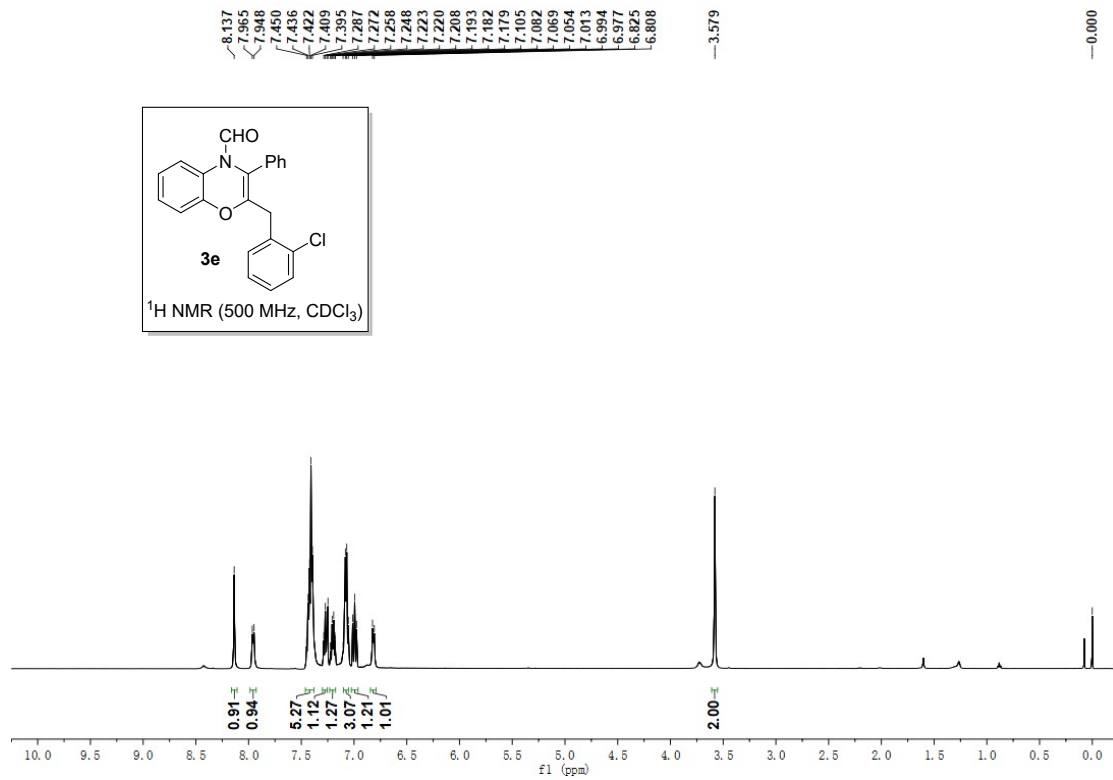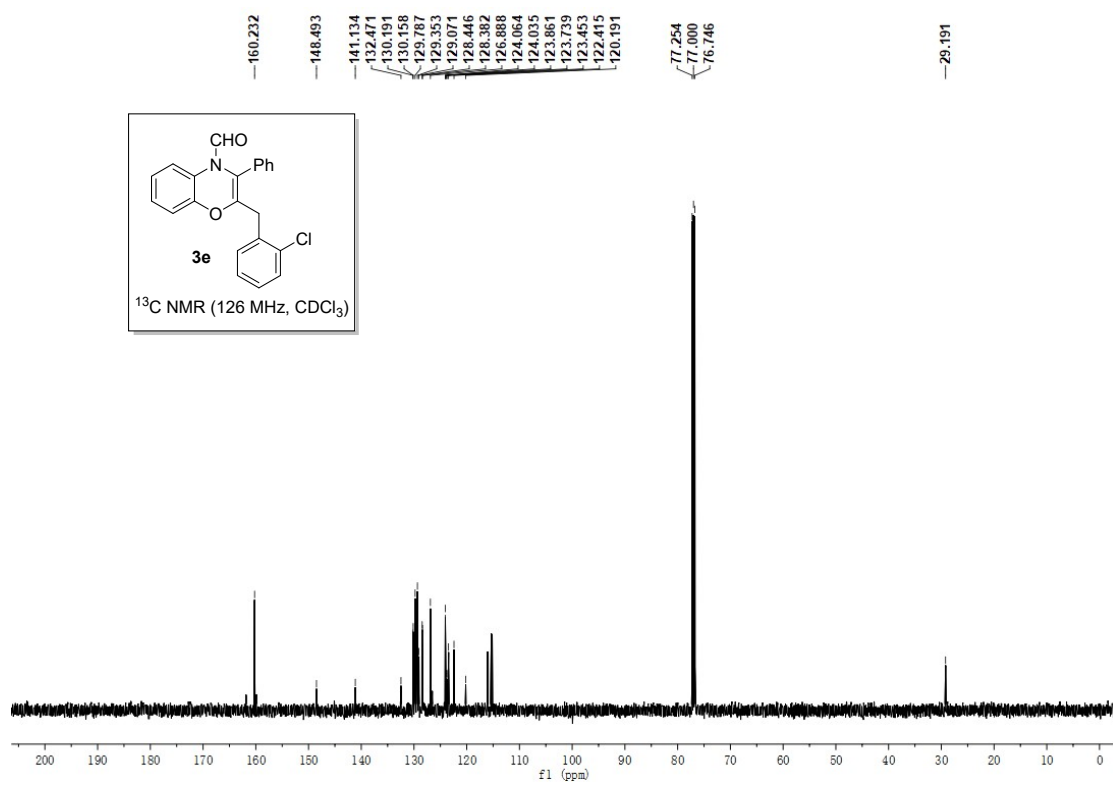



8.119  
7.943  
7.929  
7.394  
7.377  
7.367  
7.300  
7.286  
7.246  
7.238  
7.223  
7.209  
7.185  
7.170  
7.156  
7.139  
7.122  
7.099  
7.084  
7.069  
6.857  
6.842

-3.496

-0.000

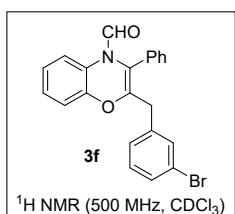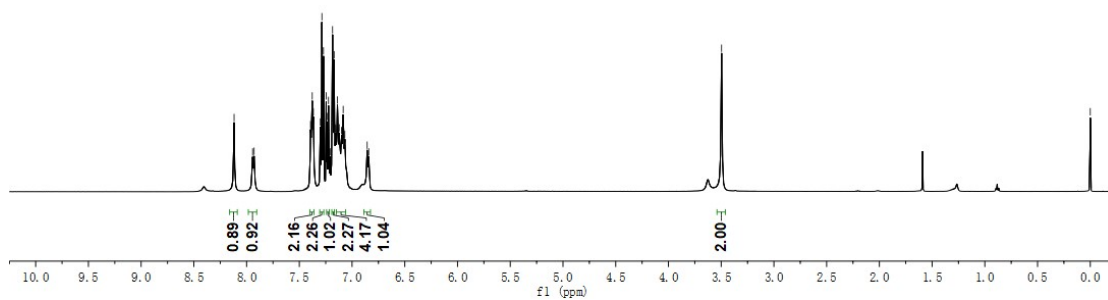

160.047  
149.250  
143.638  
136.783  
131.906  
131.777  
128.593  
128.263  
128.976  
128.754  
126.405  
123.470  
122.423  
119.013  
116.661  
116.491  
116.108

77.254  
77.000  
76.746

36.121

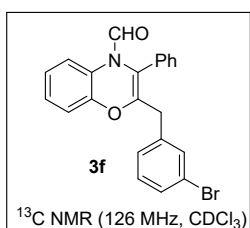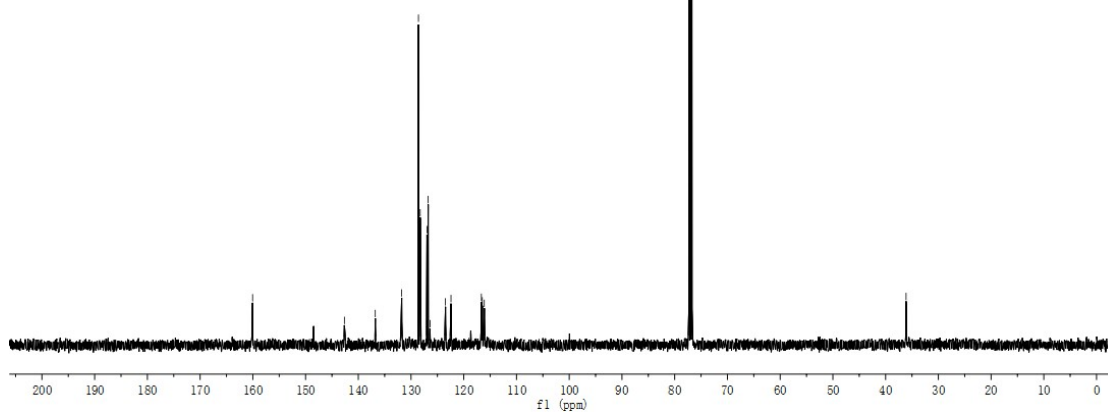

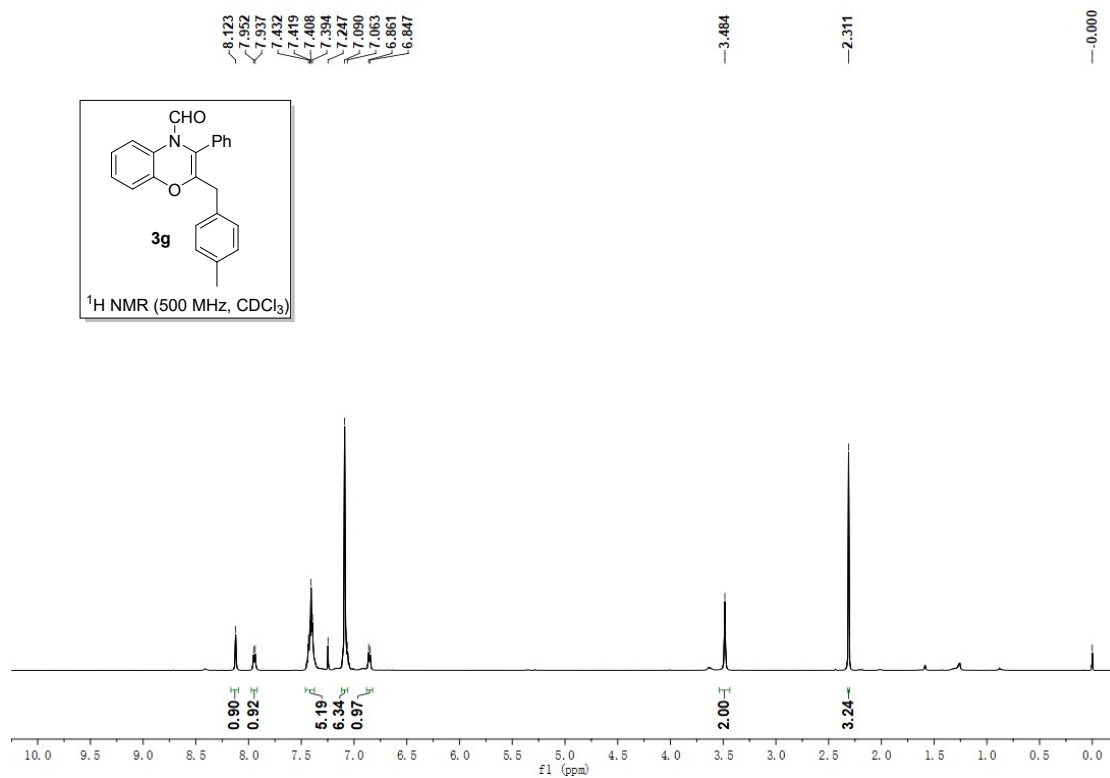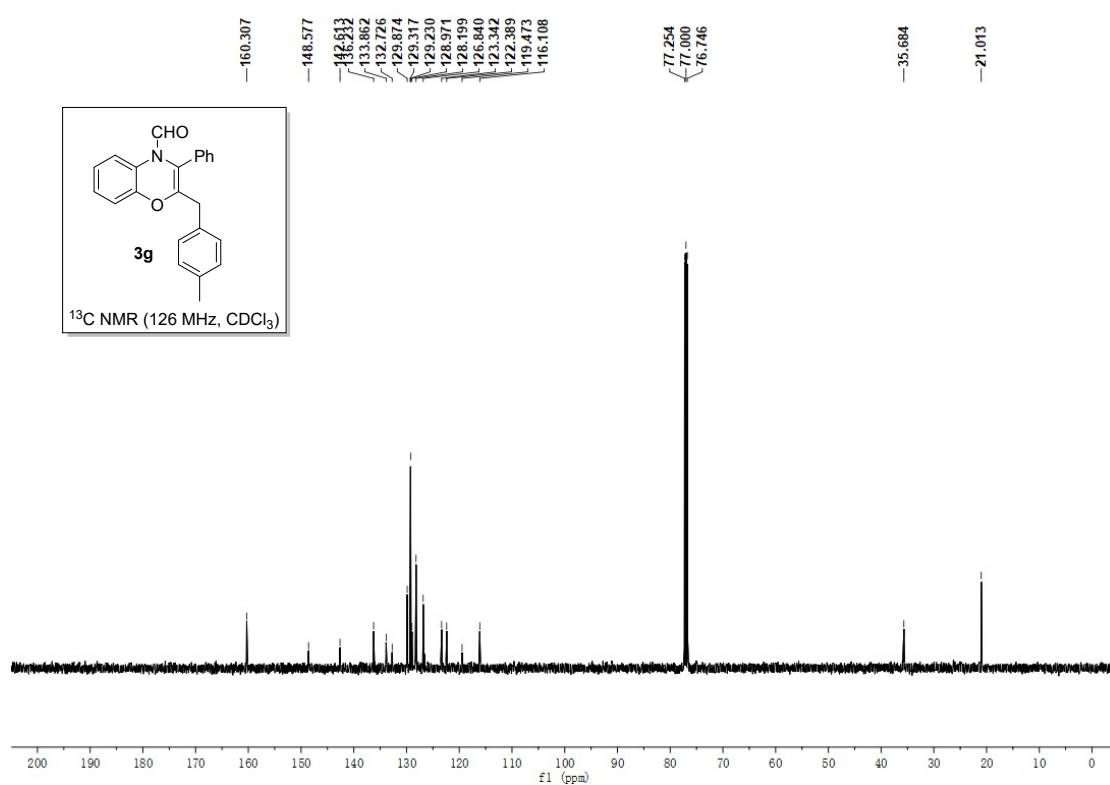

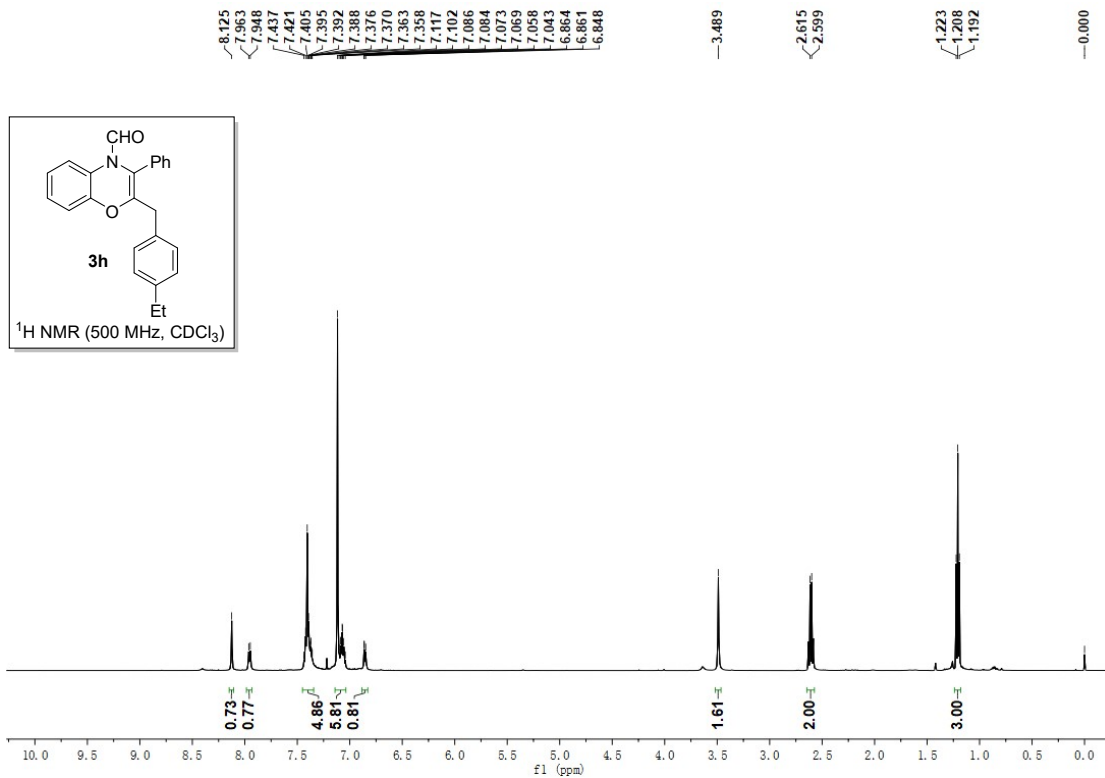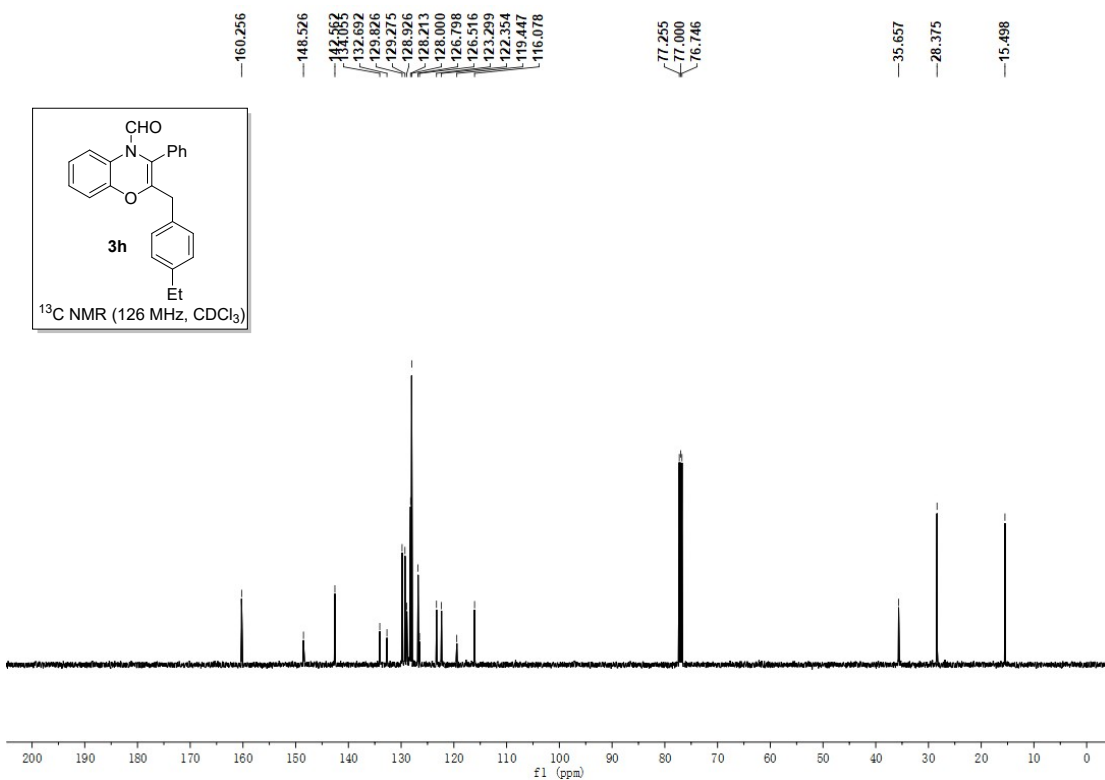

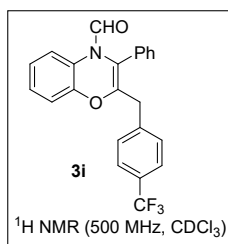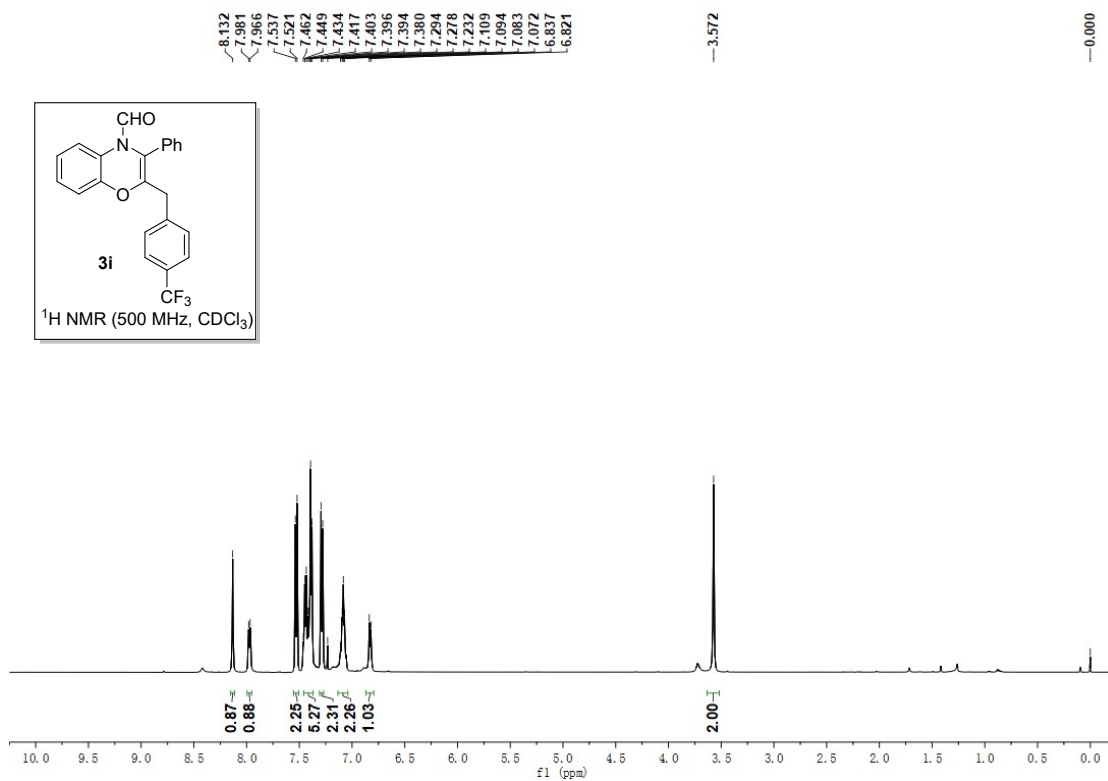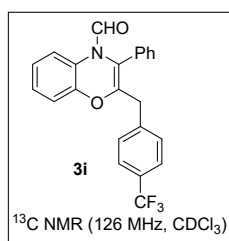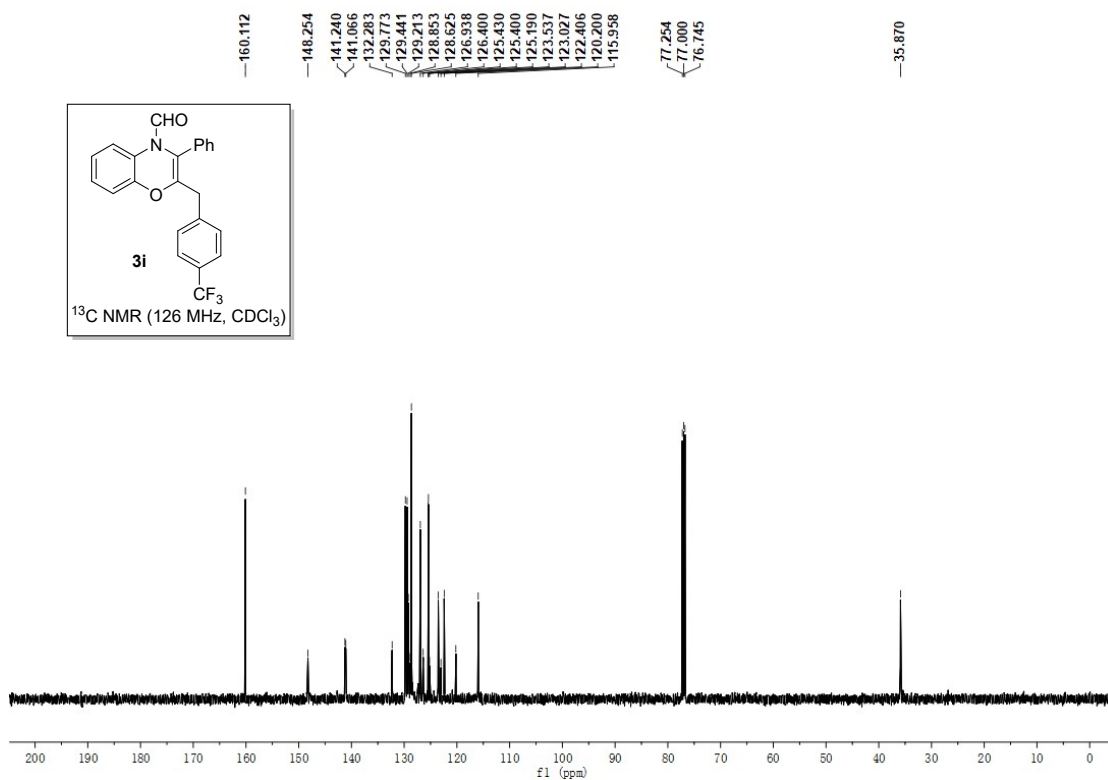

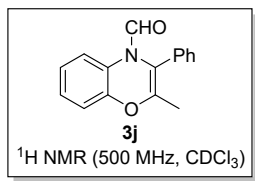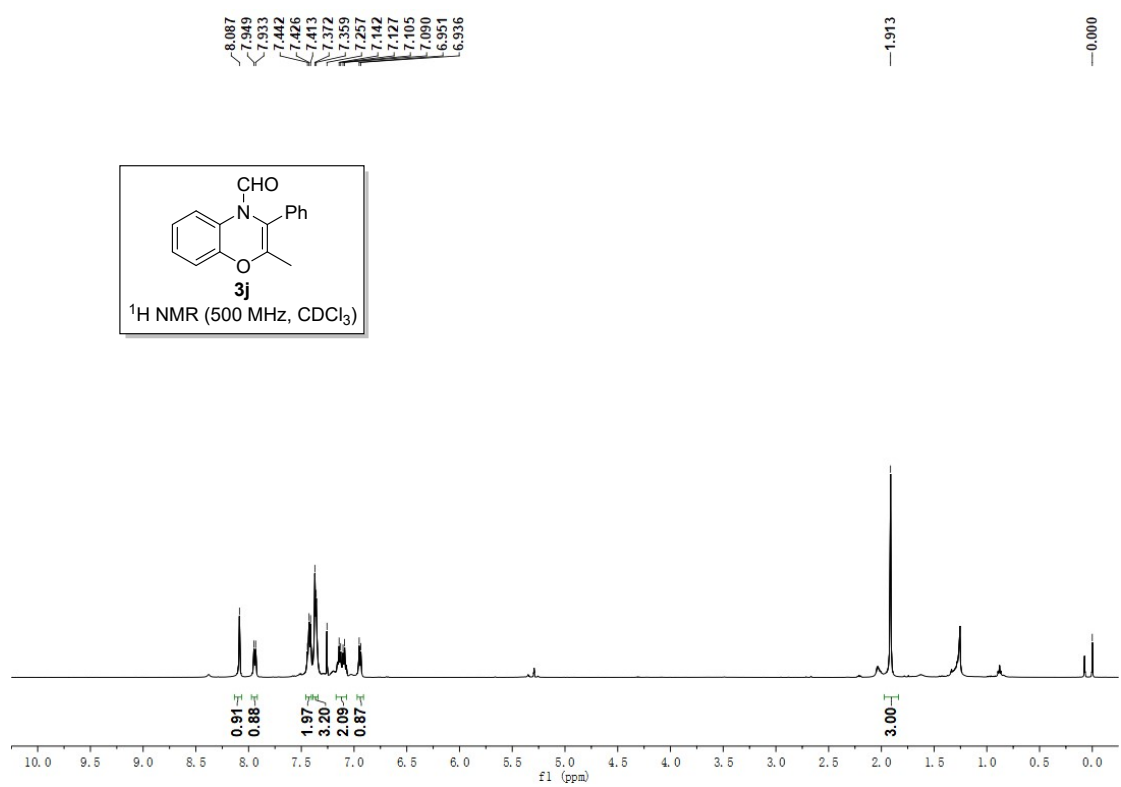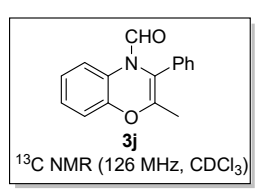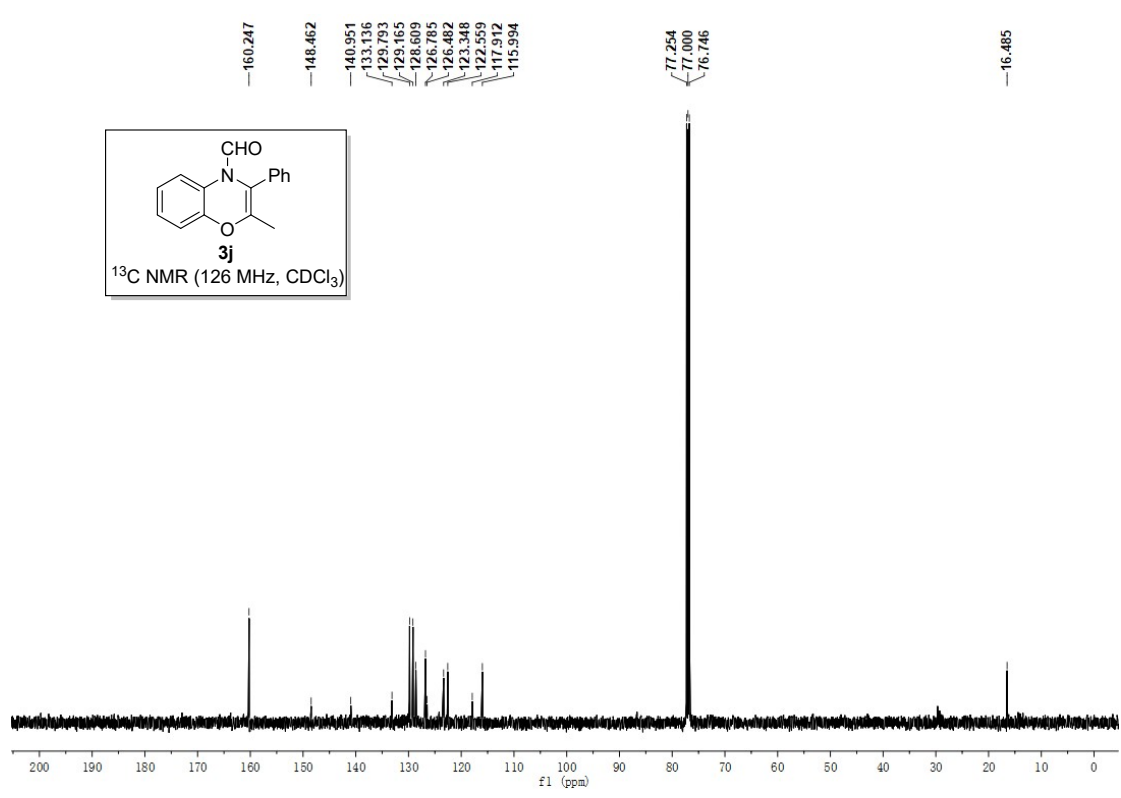

8.126  
7.967  
7.952  
7.453  
7.439  
7.423  
7.409  
7.389  
7.375  
7.361  
7.346  
7.326  
7.251  
7.163  
7.148  
7.133  
7.112  
7.096  
7.078  
6.859  
6.845

3.487

0.000

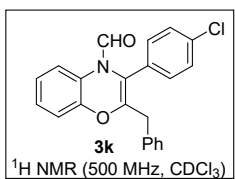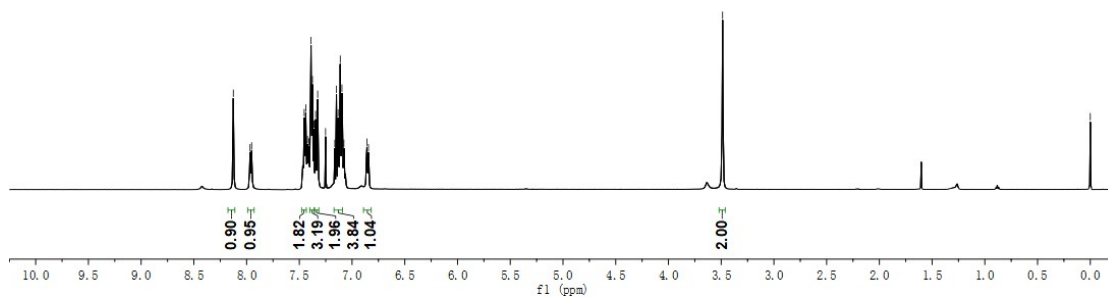

160.192  
148.339  
141.471  
139.255  
132.355  
131.473  
130.060  
129.845  
129.439  
129.206  
126.953  
126.442  
123.521  
122.540  
122.415  
120.057  
116.050

77.255  
77.000  
76.746

35.743

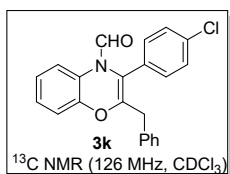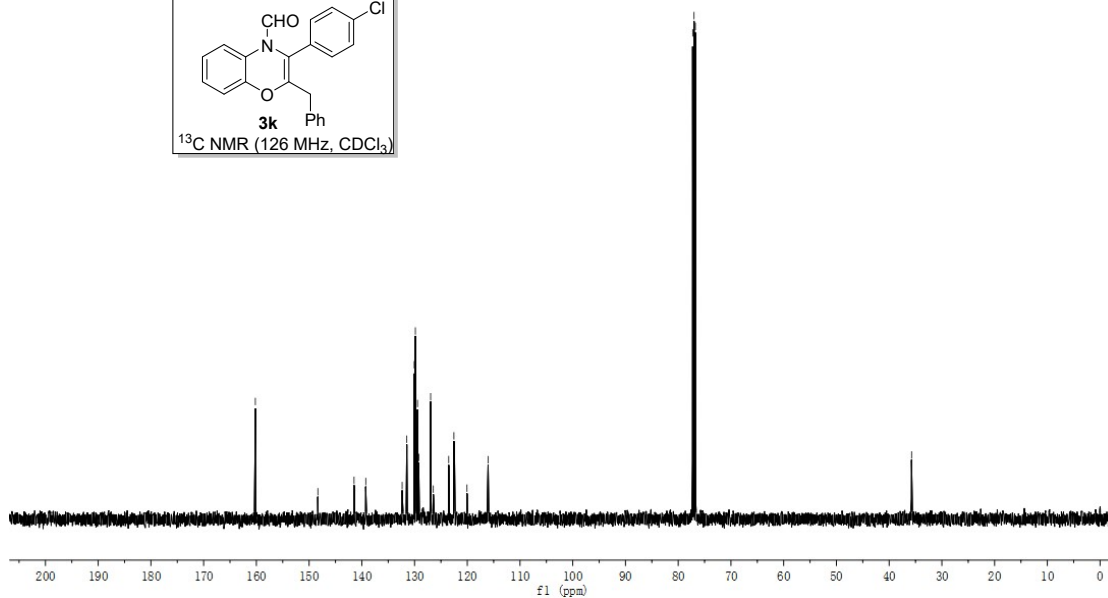



8.104  
7.922  
7.908  
7.776  
7.761  
7.299  
7.284  
7.270  
7.235  
7.221  
7.206  
7.188  
7.173  
7.143  
7.127  
7.090  
7.076  
6.847  
6.834

3.510

0.000

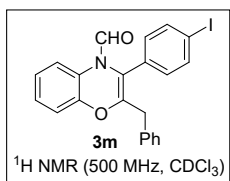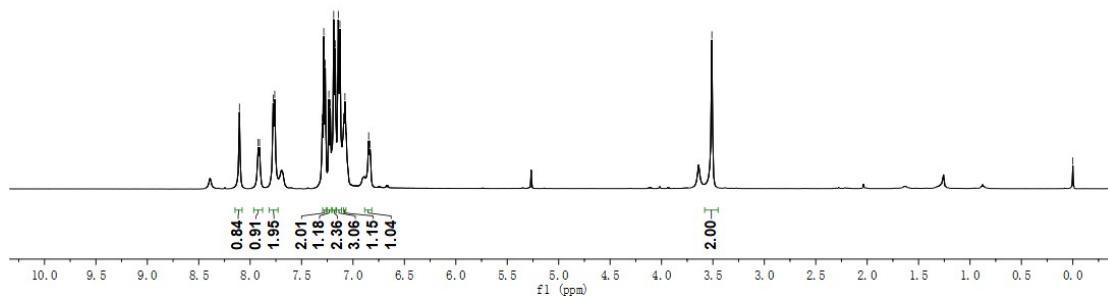

159.992  
148.419  
142.953  
138.515  
136.630  
132.275  
131.417  
128.585  
128.220  
126.975  
126.758  
123.496  
122.446  
118.761  
116.073

94.876

77.255  
77.000  
76.746

36.114

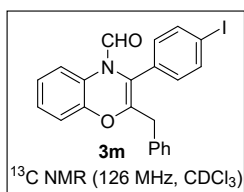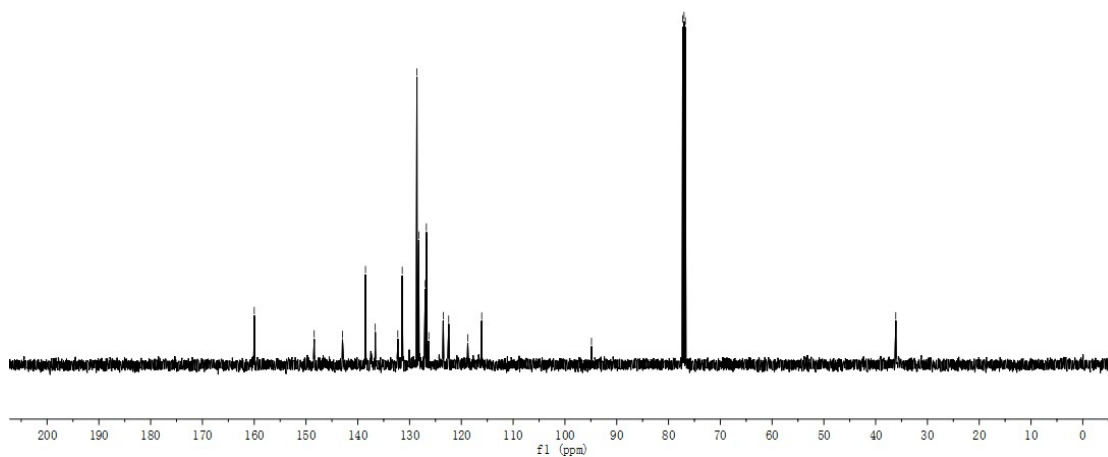



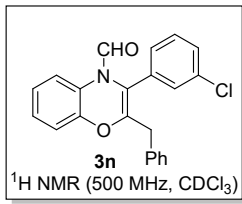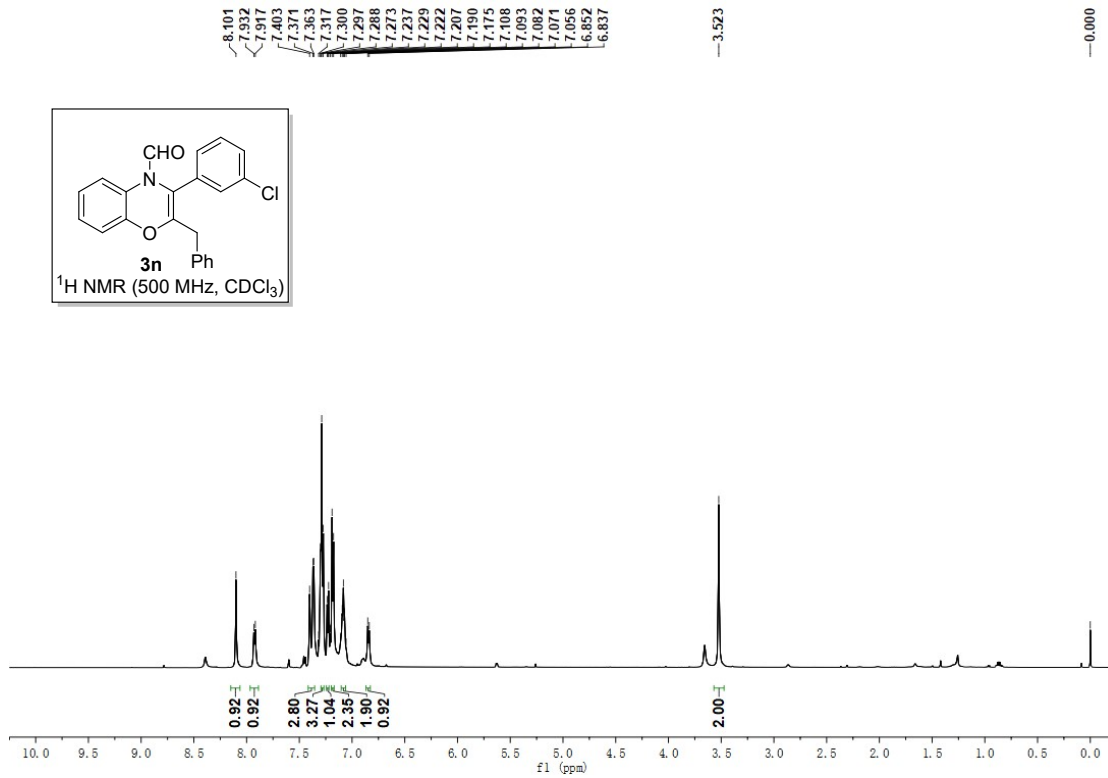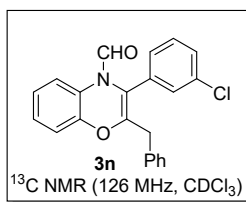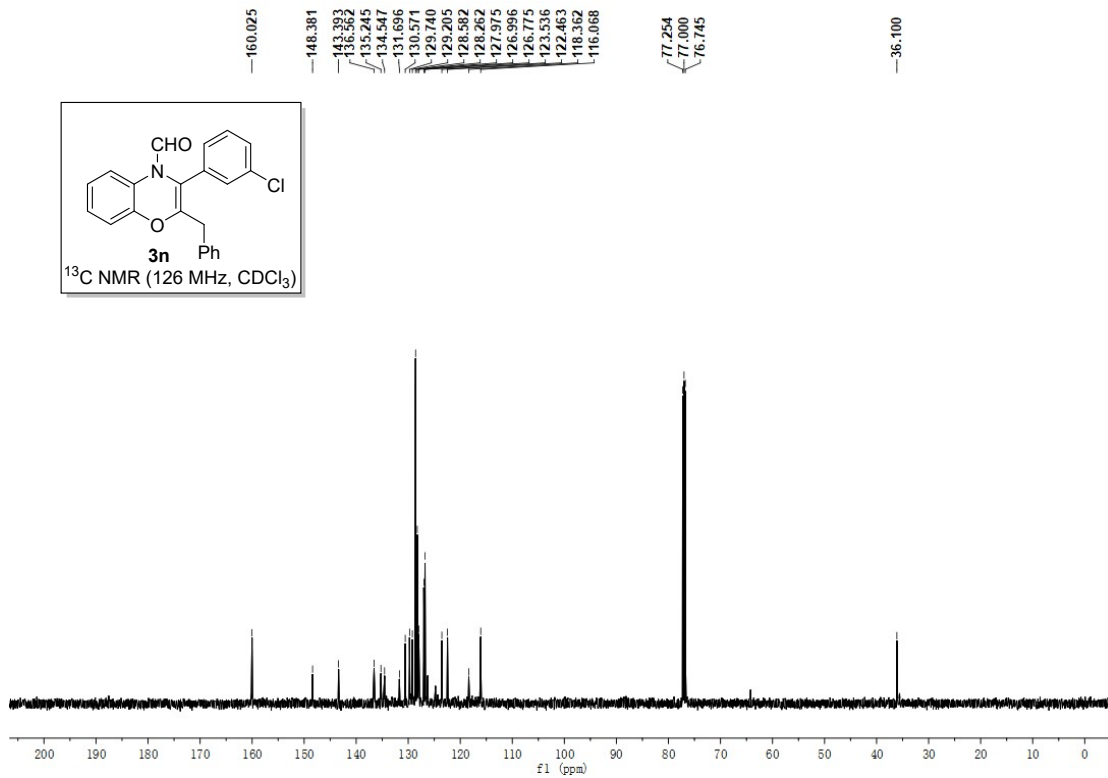

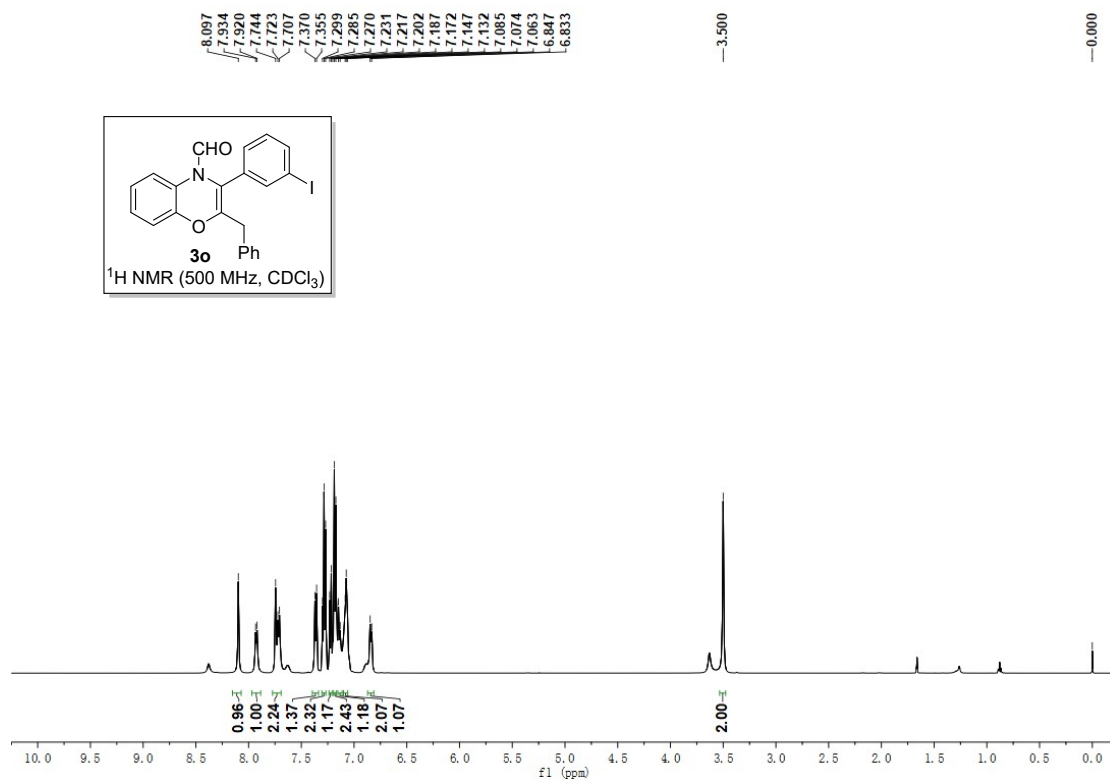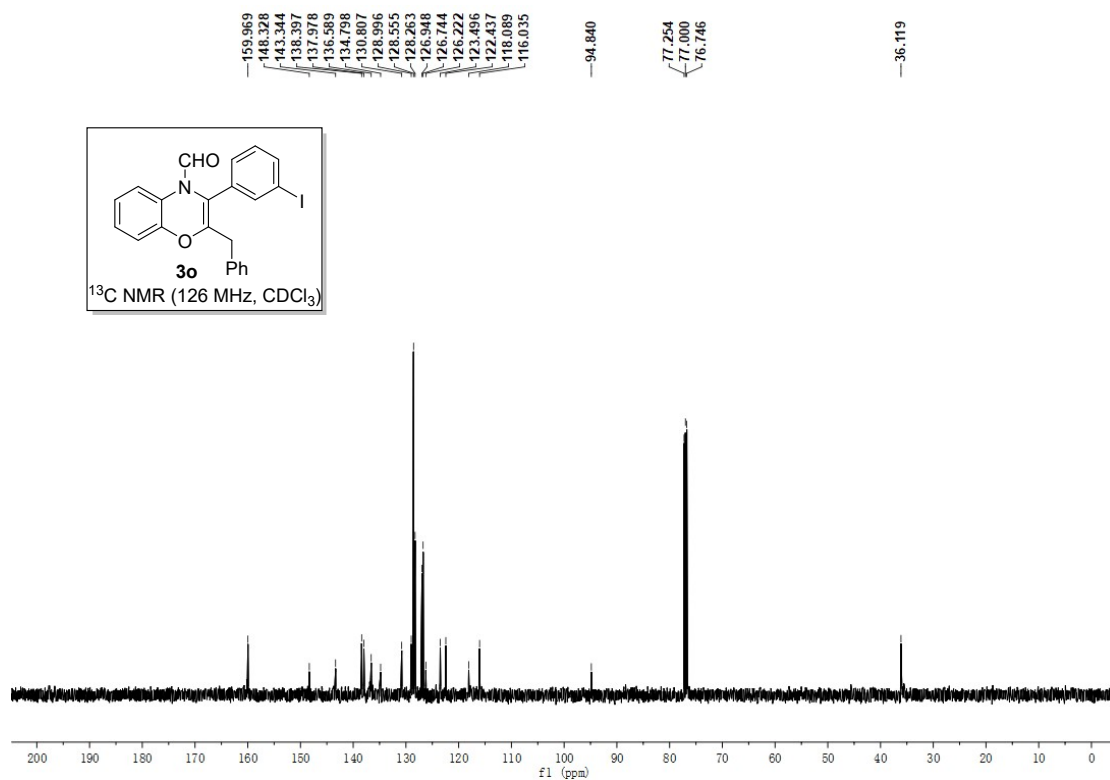

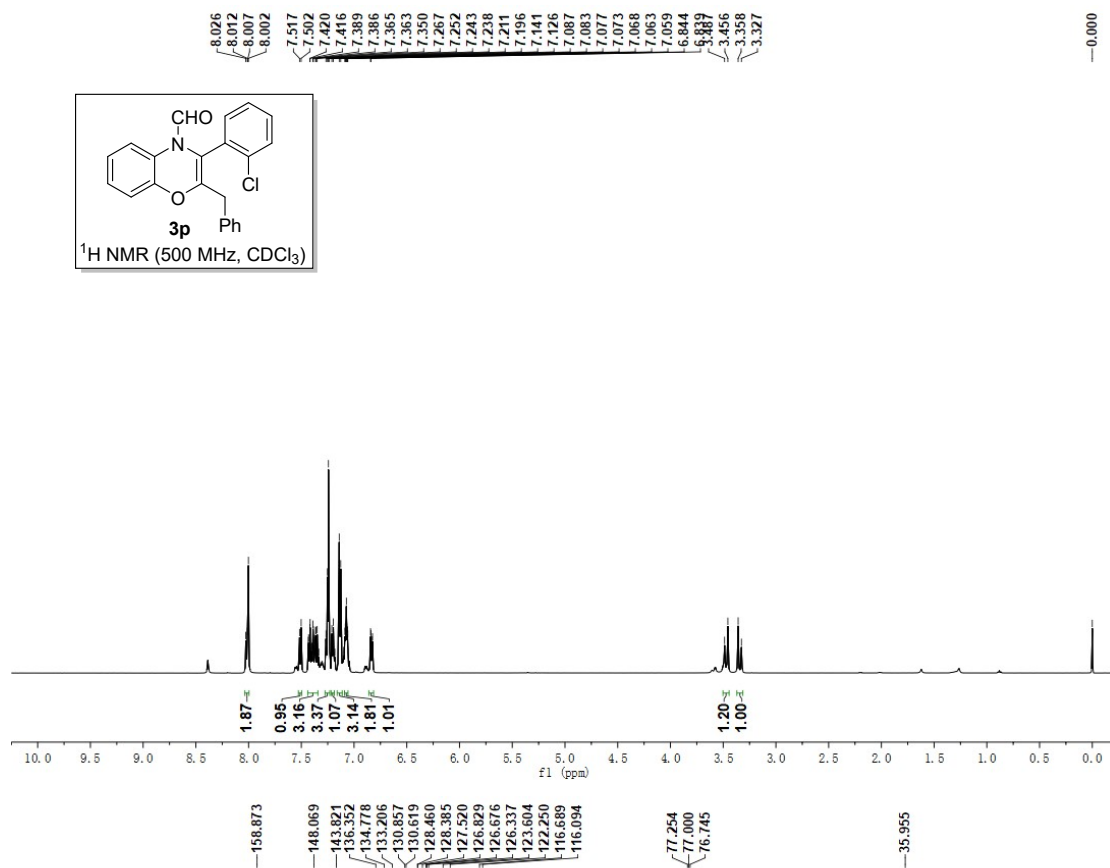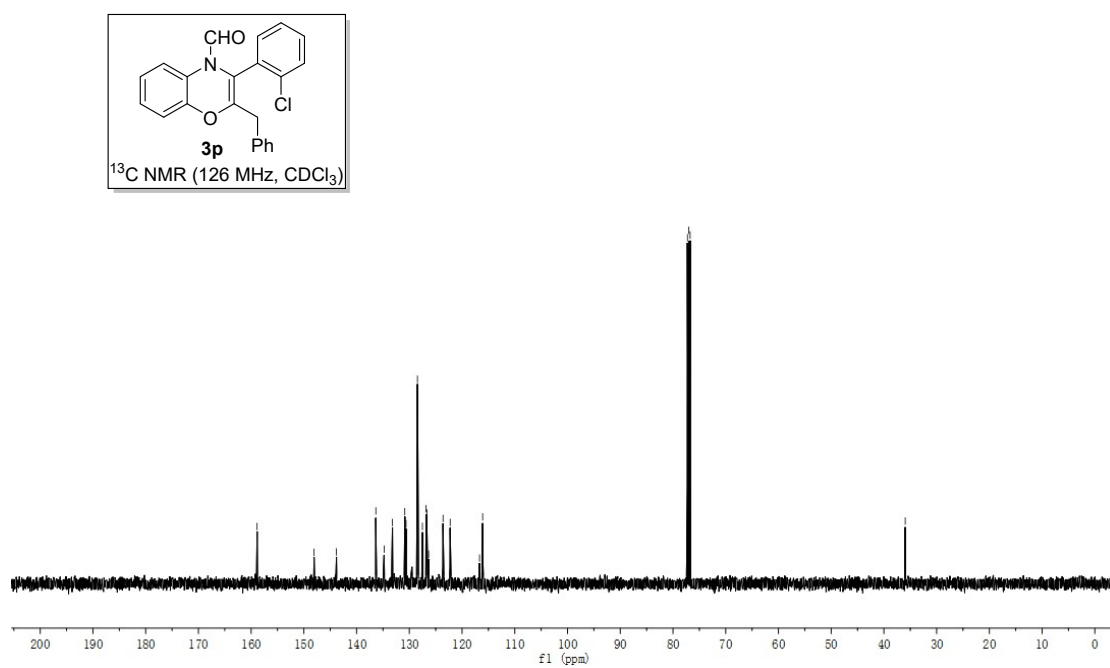

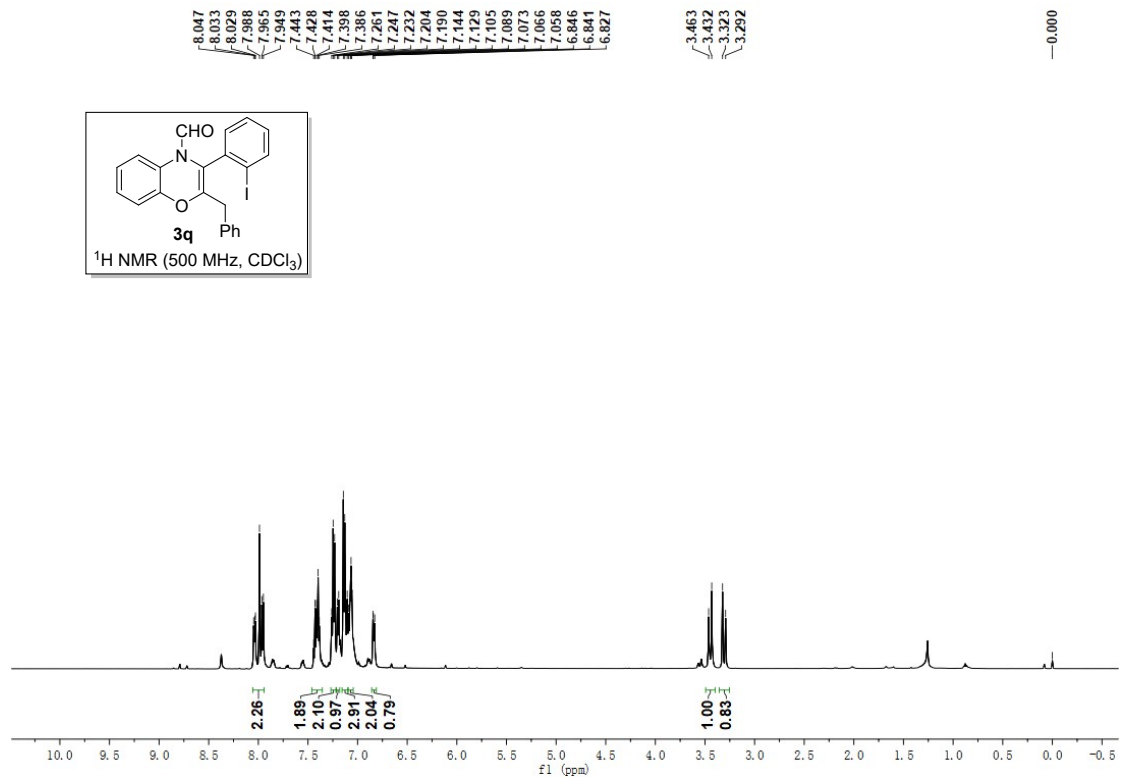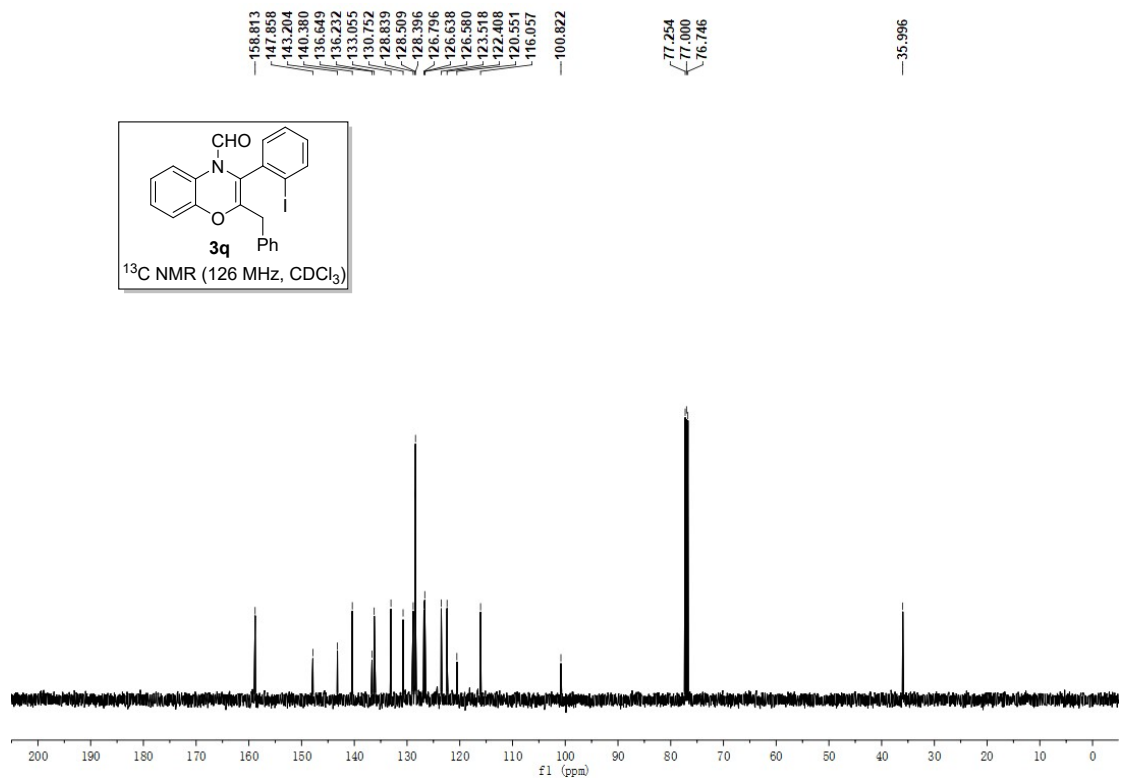

8.128  
7.976  
7.962  
7.959  
7.313  
7.298  
7.283  
7.269  
7.254  
7.214  
7.206  
7.194  
7.181  
7.080  
7.062  
7.056  
7.049  
7.032  
6.832  
6.828  
6.814

3.516

2.349

0.000

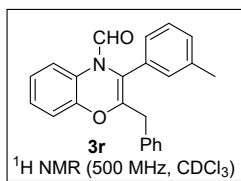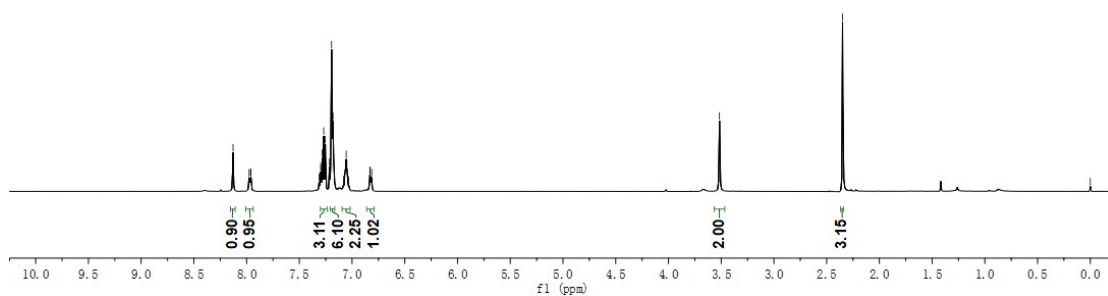

160.263

148.481

142.103

139.087

137.051

132.467

130.284

129.722

129.106

128.432

128.294

126.596

126.749

126.558

123.265

122.301

119.703

115.986

77.254

77.000

76.745

36.053

21.299

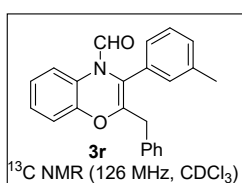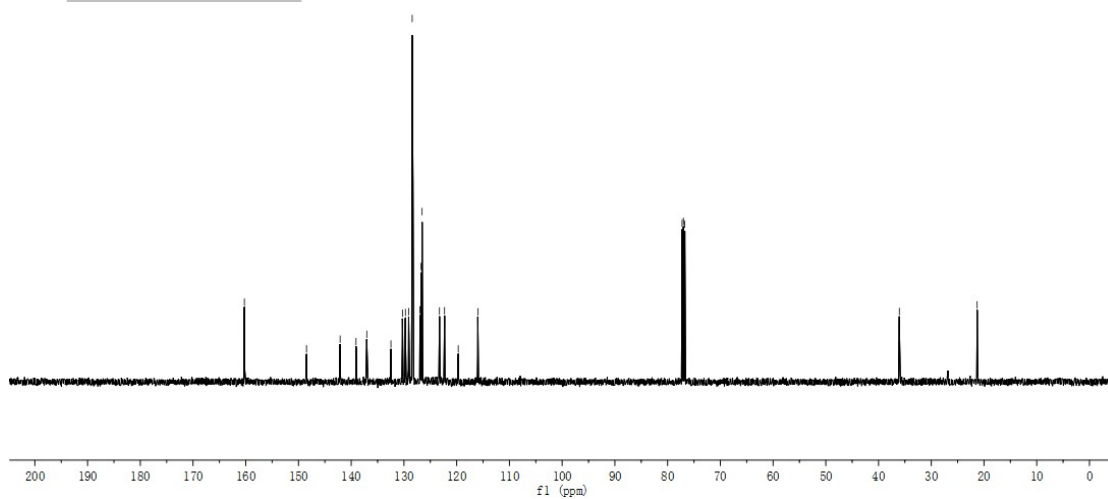

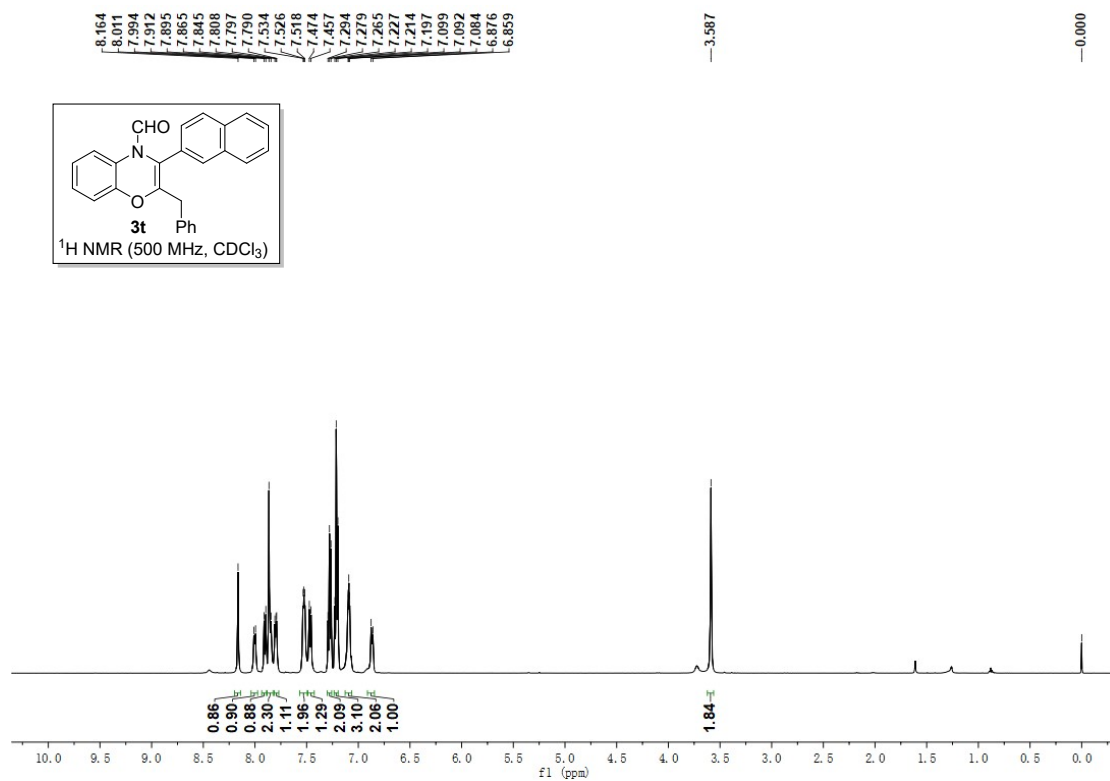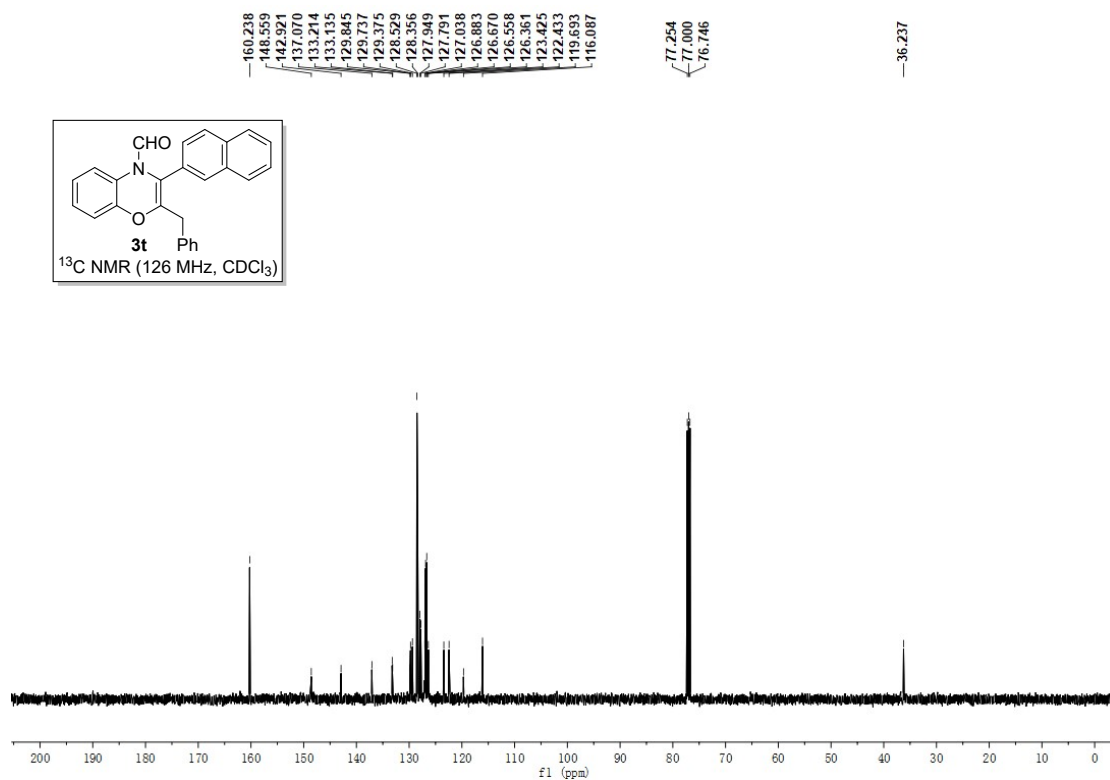

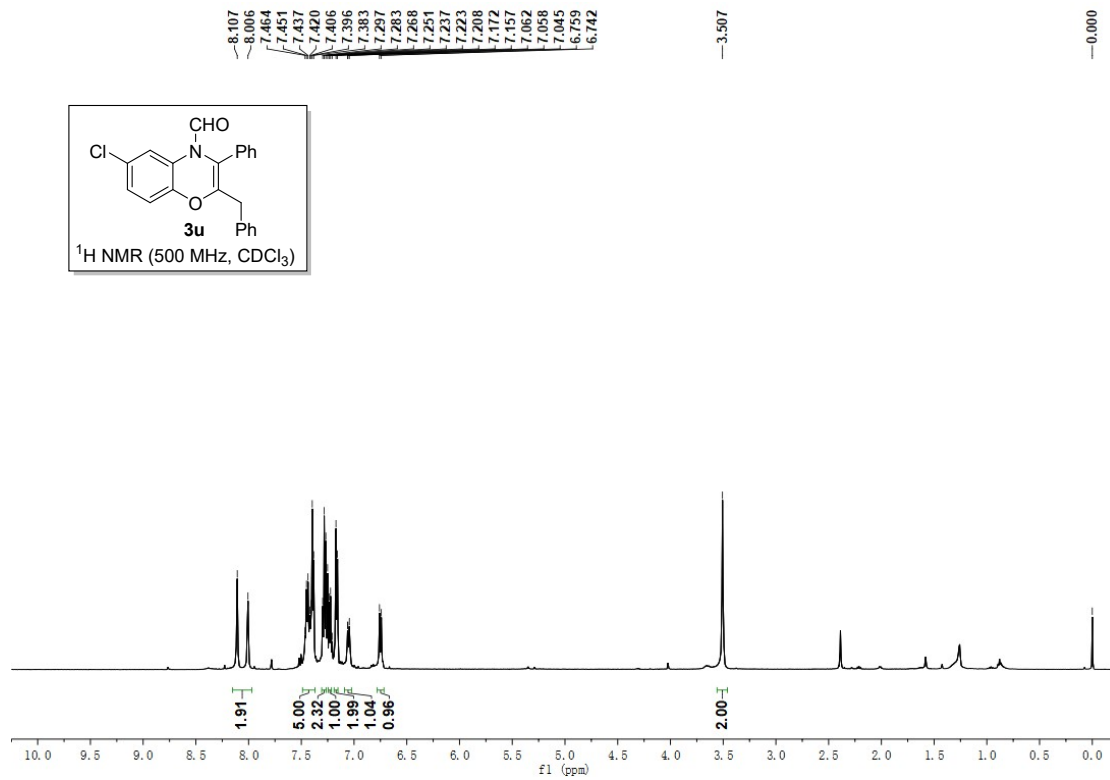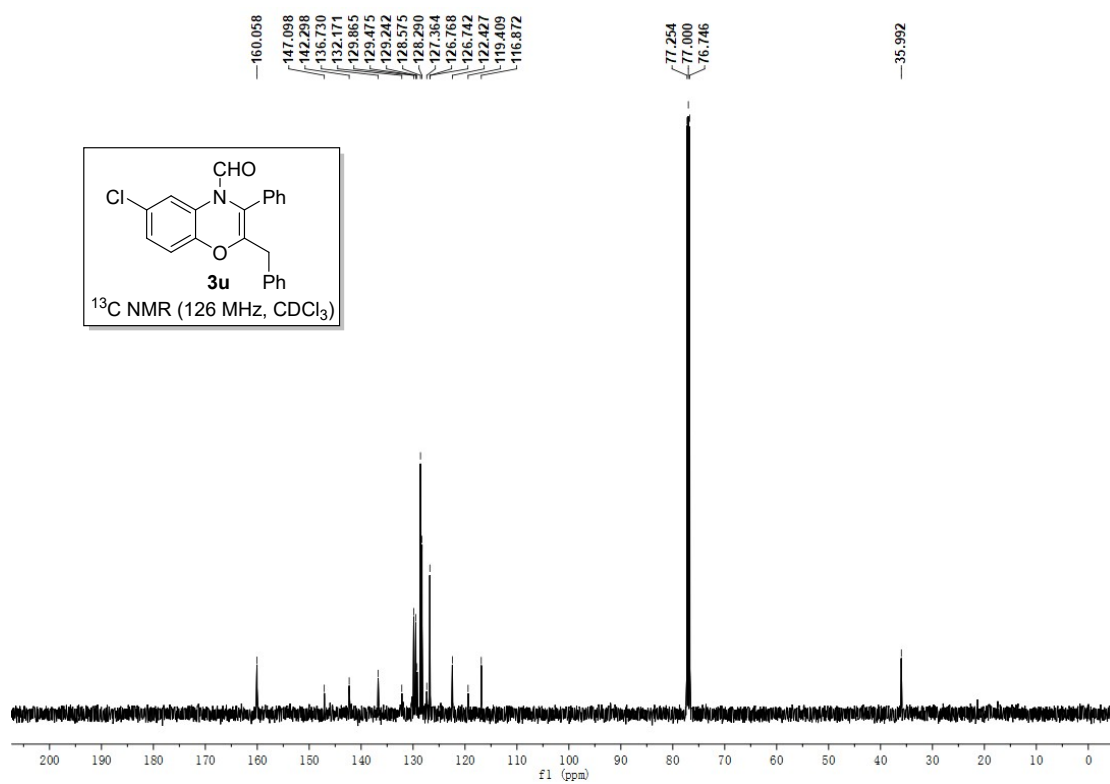

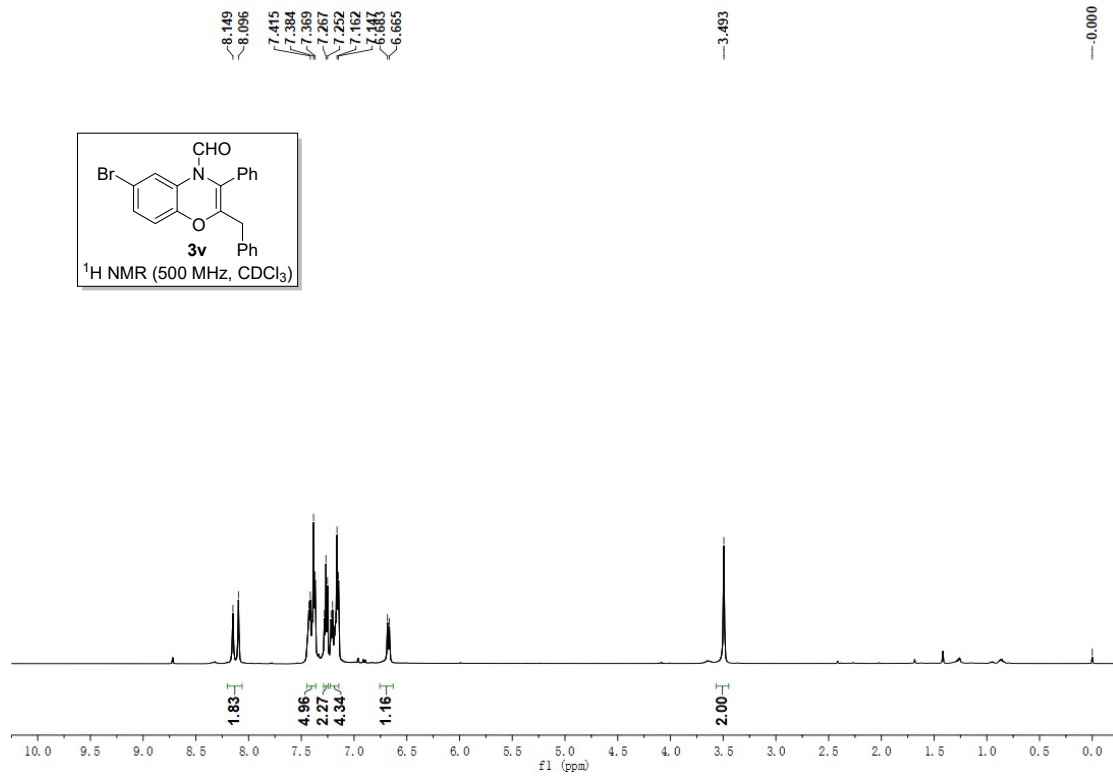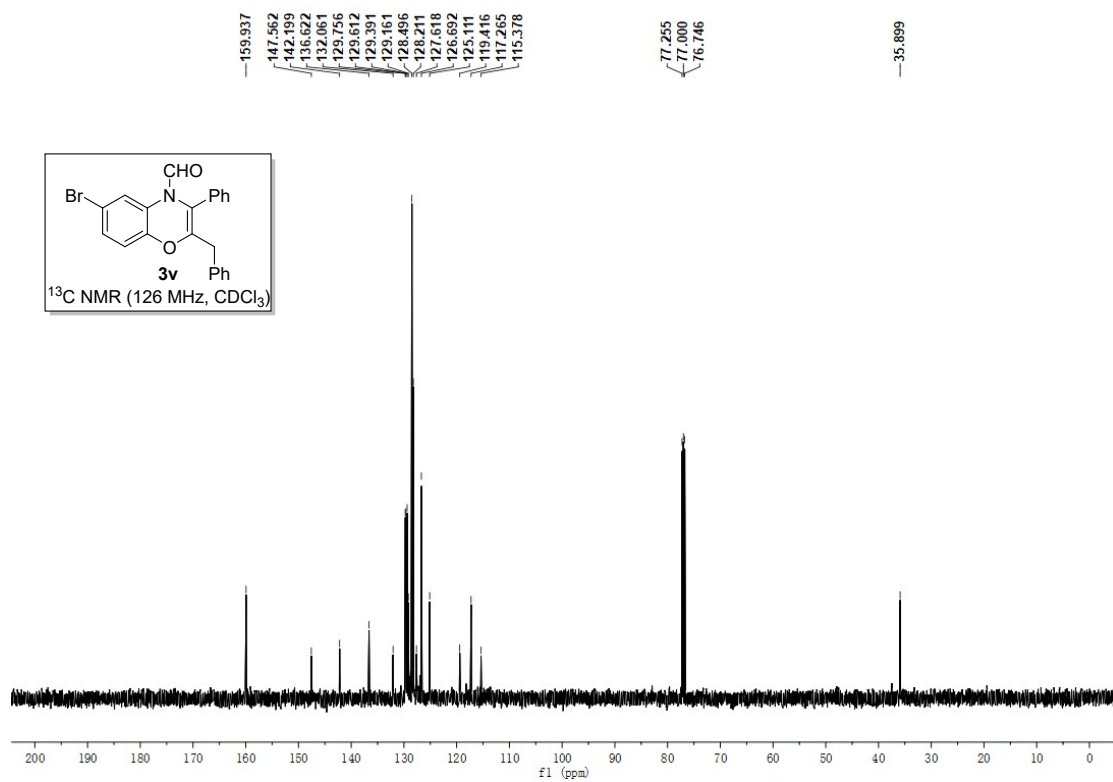



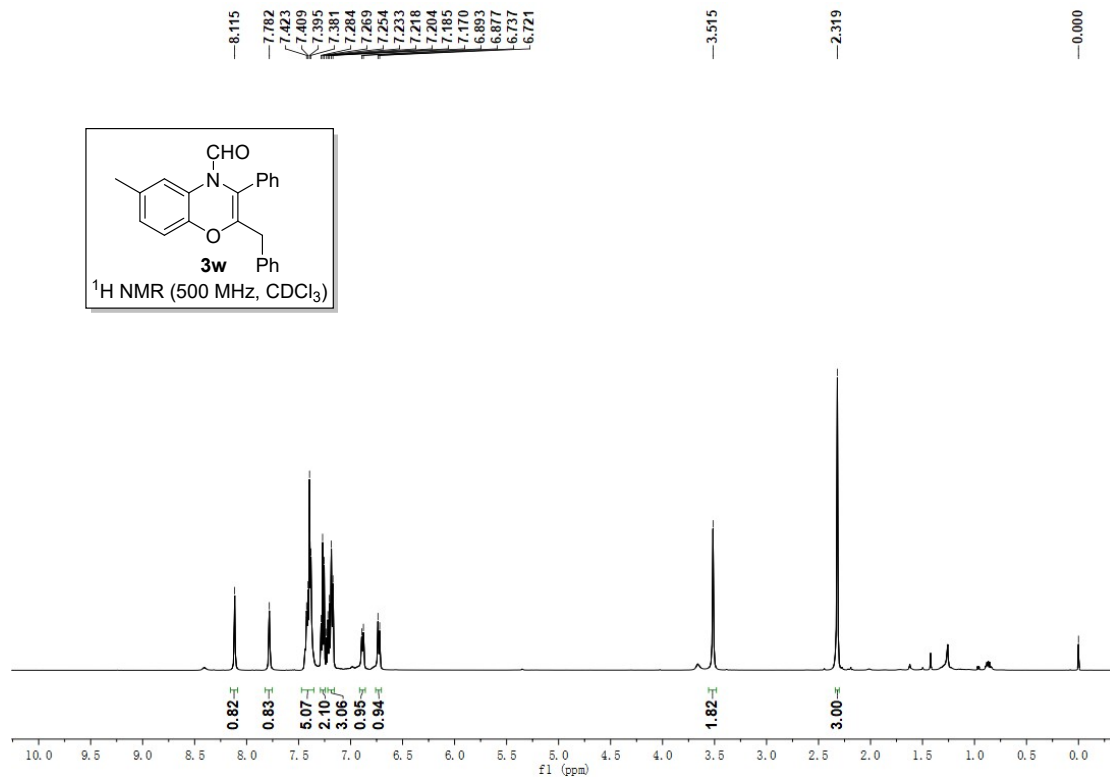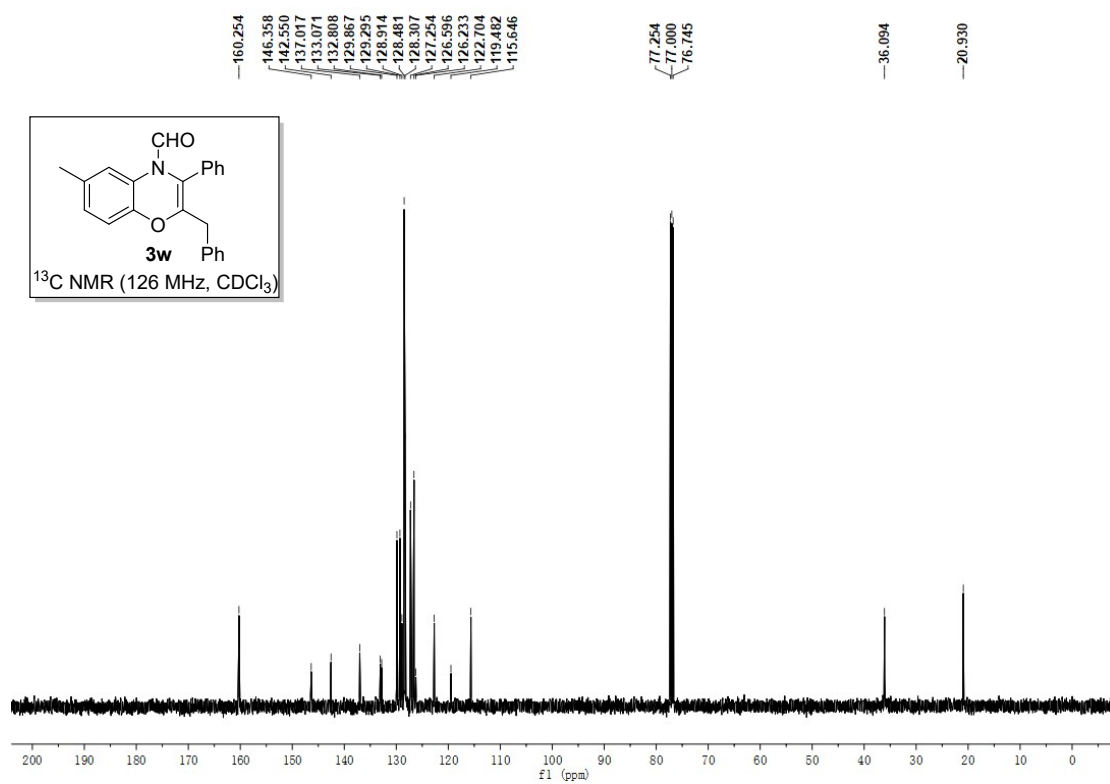

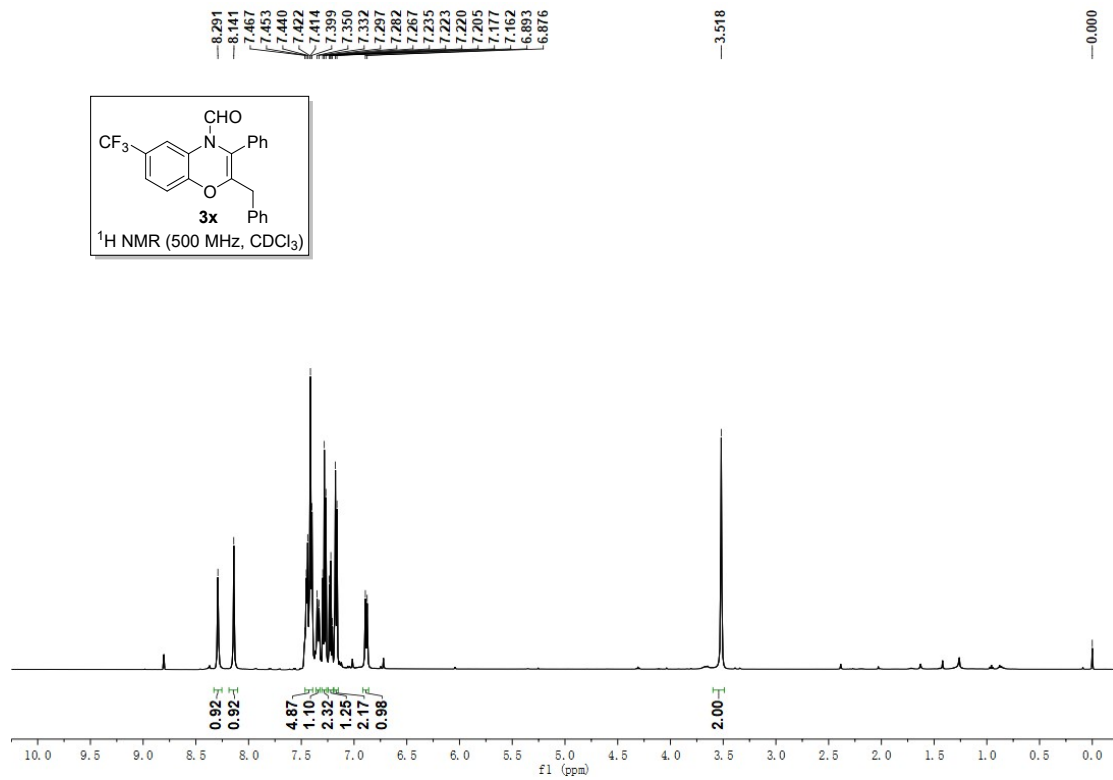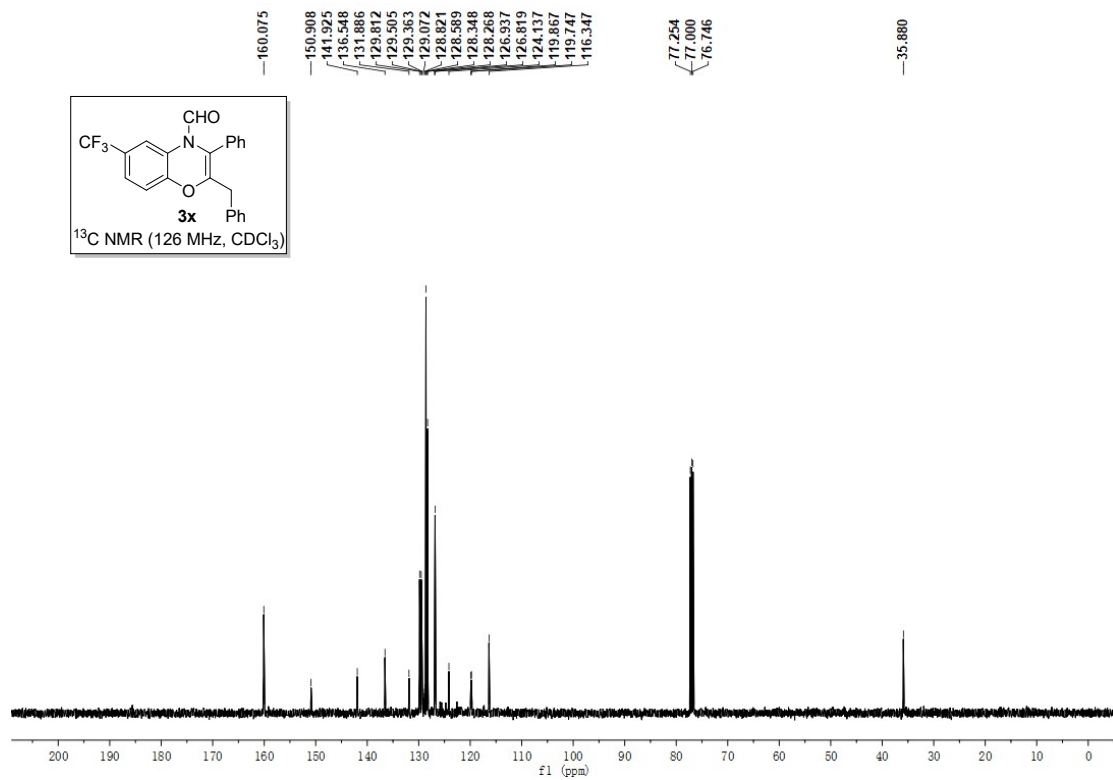

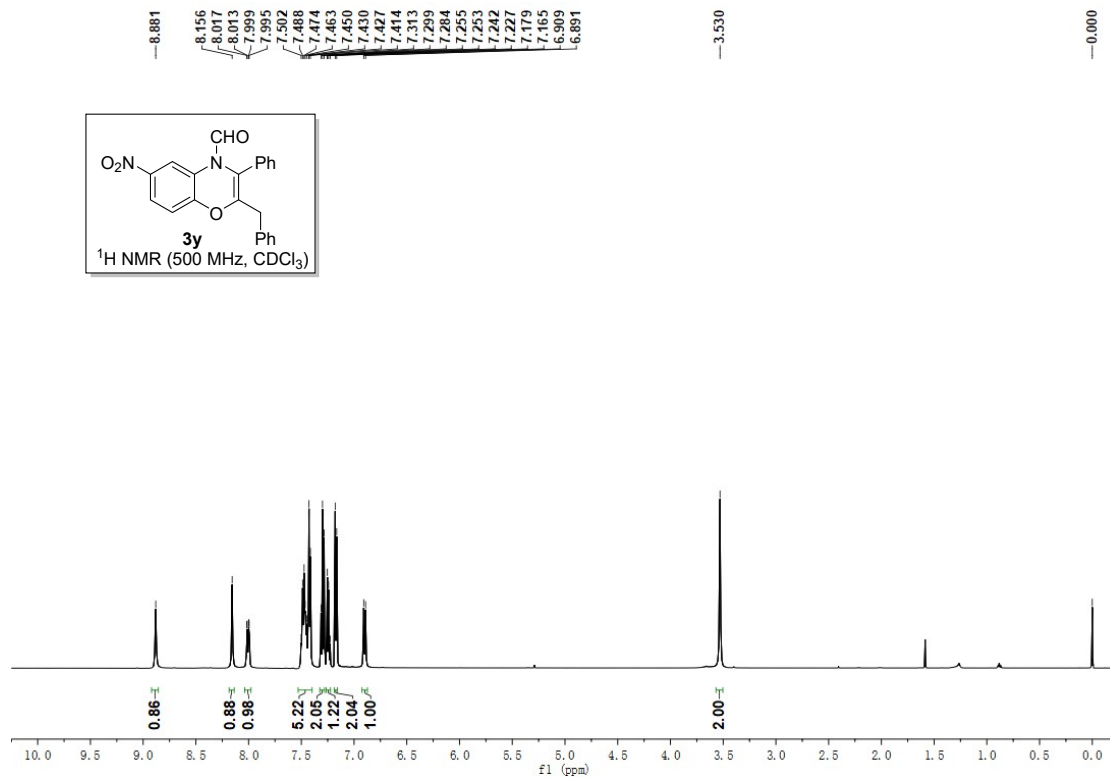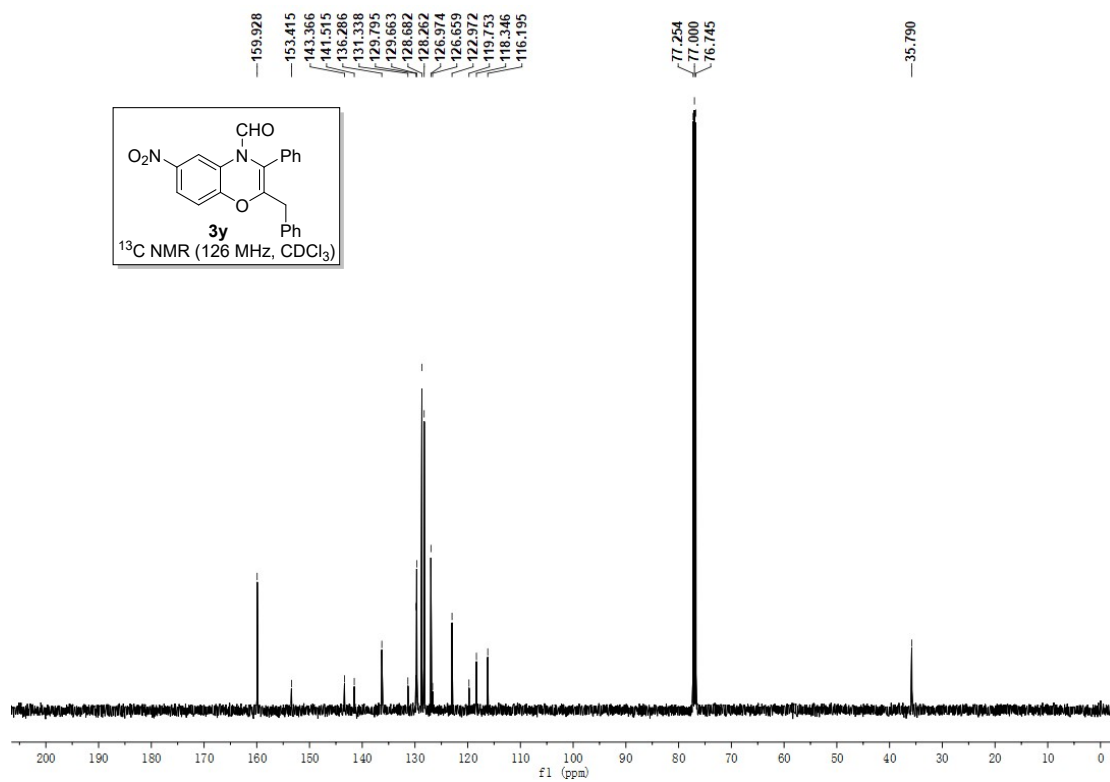

8.923  
8.492  
8.036  
8.031  
8.016  
7.974  
7.907  
7.886  
7.846  
7.833  
7.828  
7.583  
7.575  
7.568  
7.481  
7.478  
7.464  
7.461  
7.318  
7.304  
7.289  
7.262  
7.248  
7.197  
7.183  
6.937  
6.919

3.598

0.000

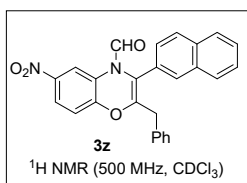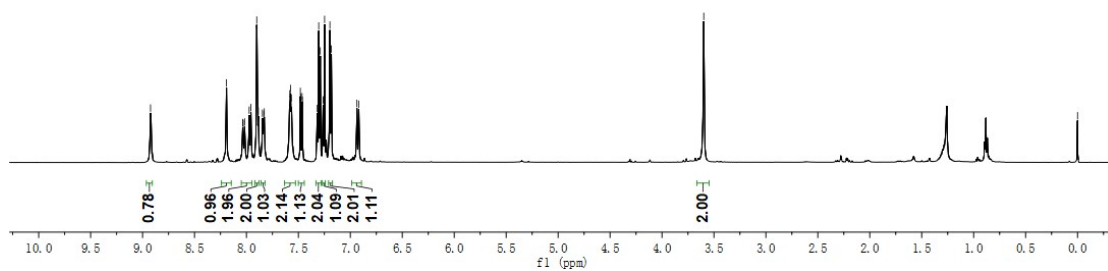

159.939  
153.471  
142.020  
136.398  
133.382  
133.231  
129.940  
129.815  
128.708  
128.308  
128.019  
127.899  
127.465  
127.191  
127.008  
125.943  
123.015  
119.853  
118.419  
116.235

77.255  
77.000  
76.746

35.949

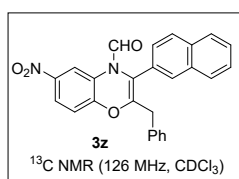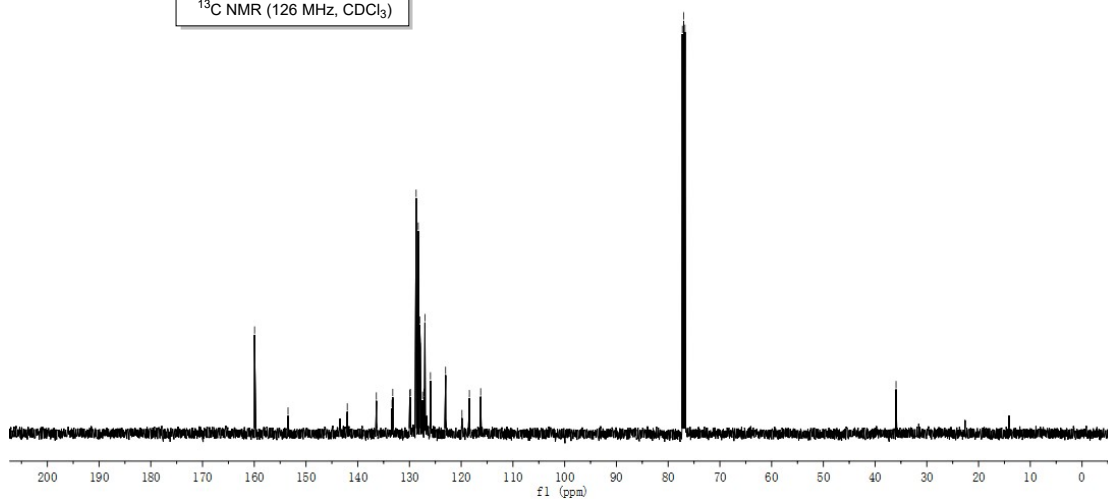

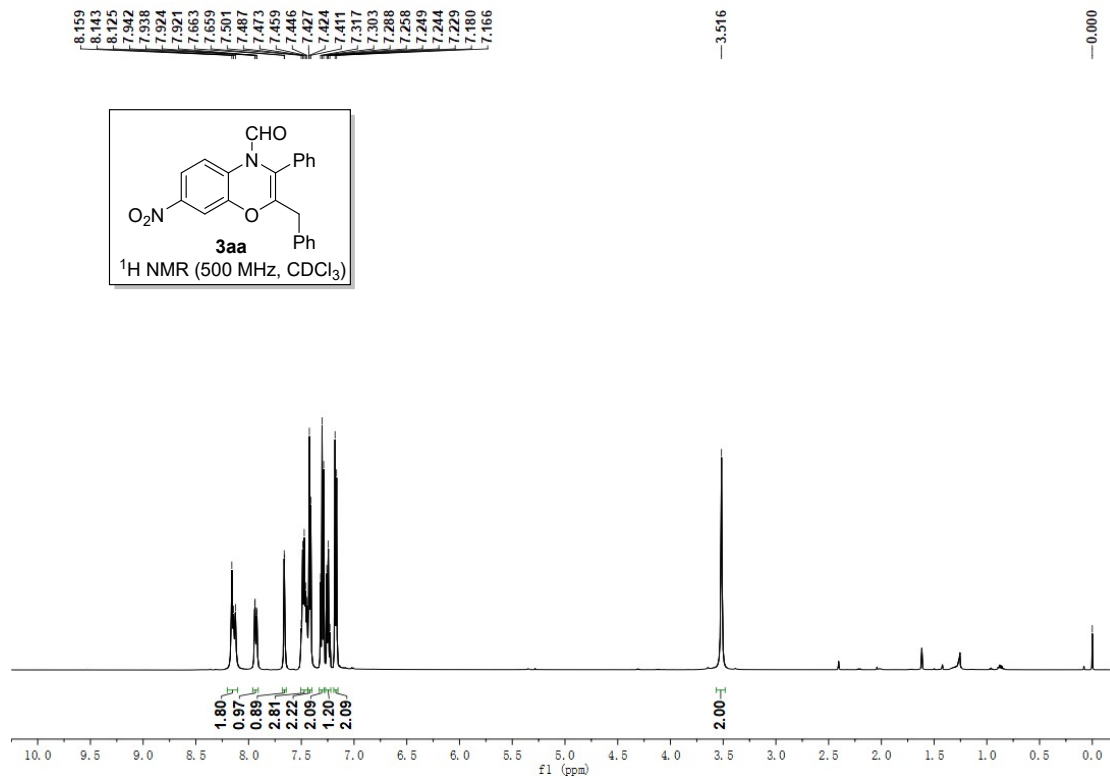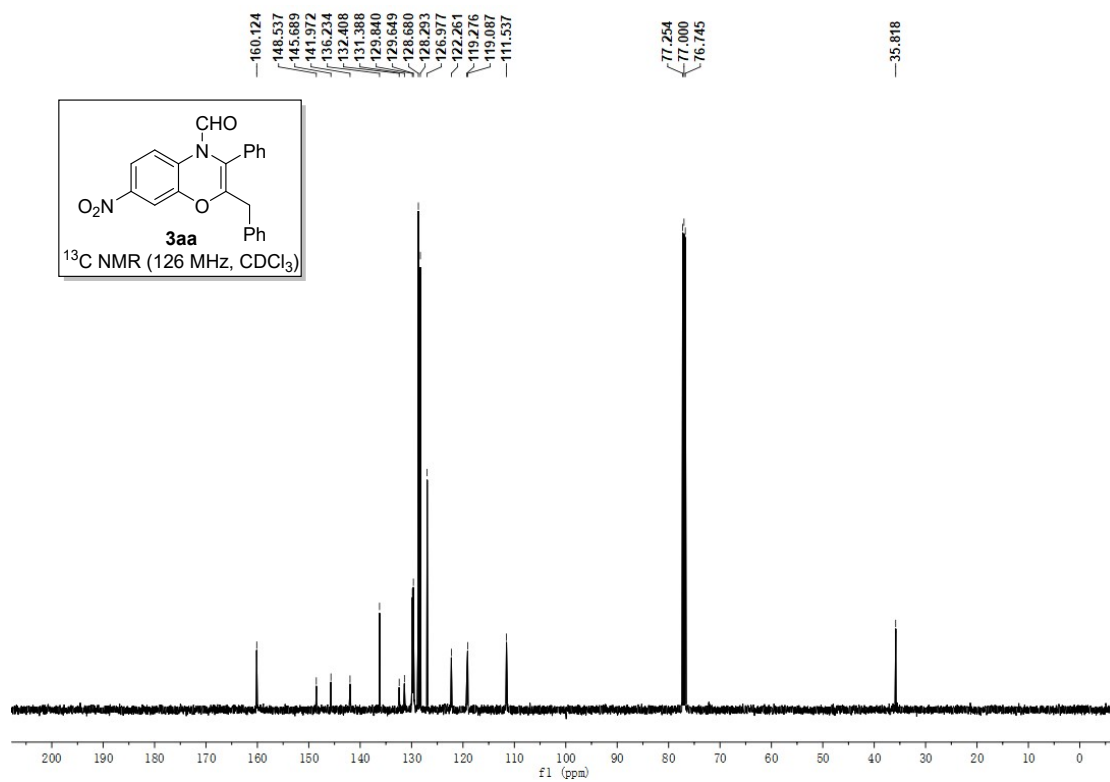

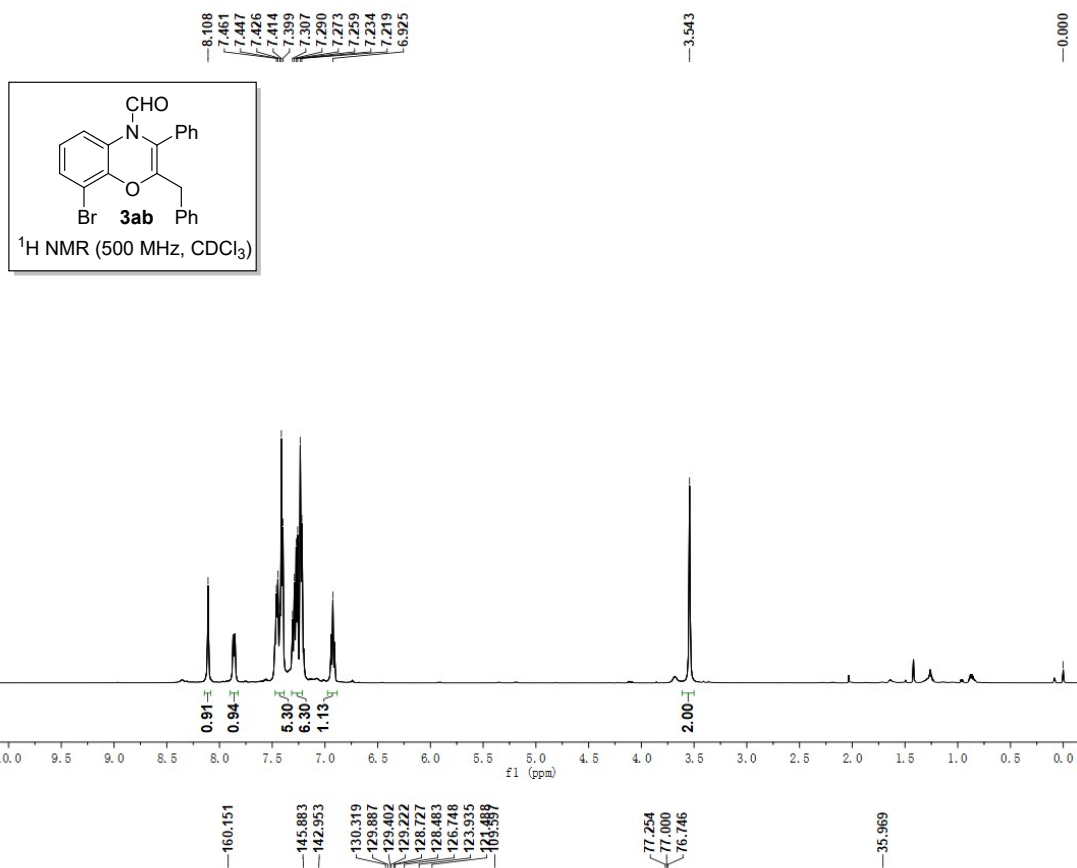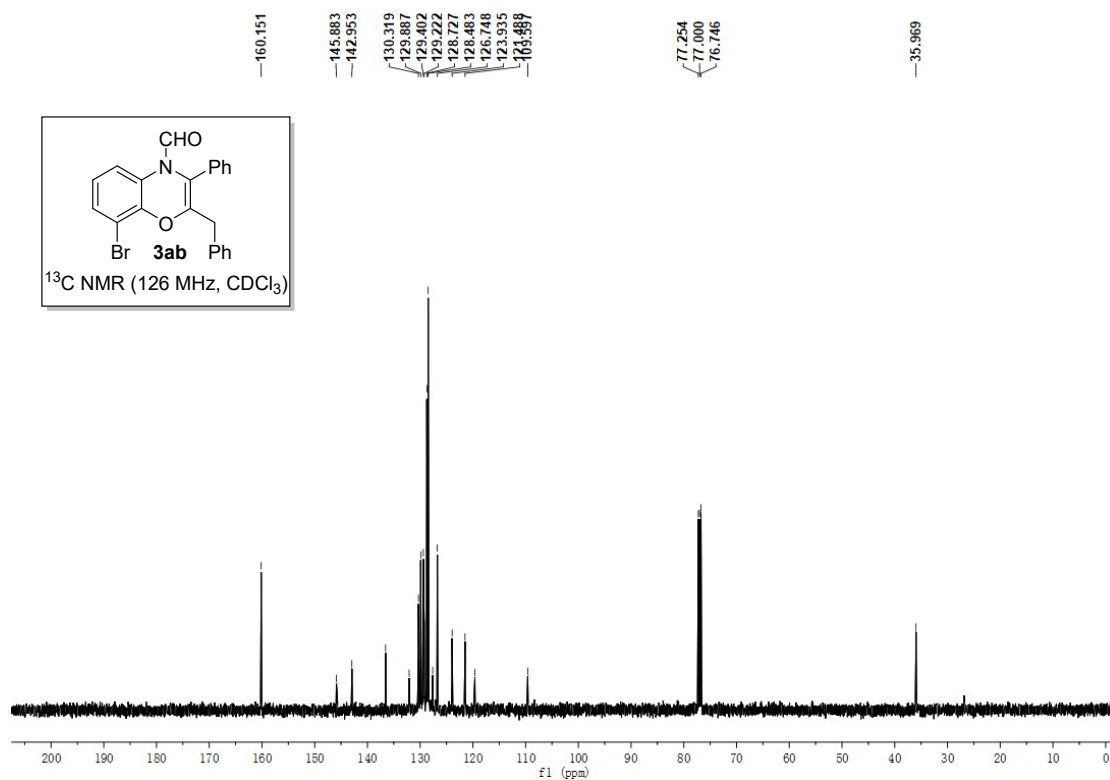

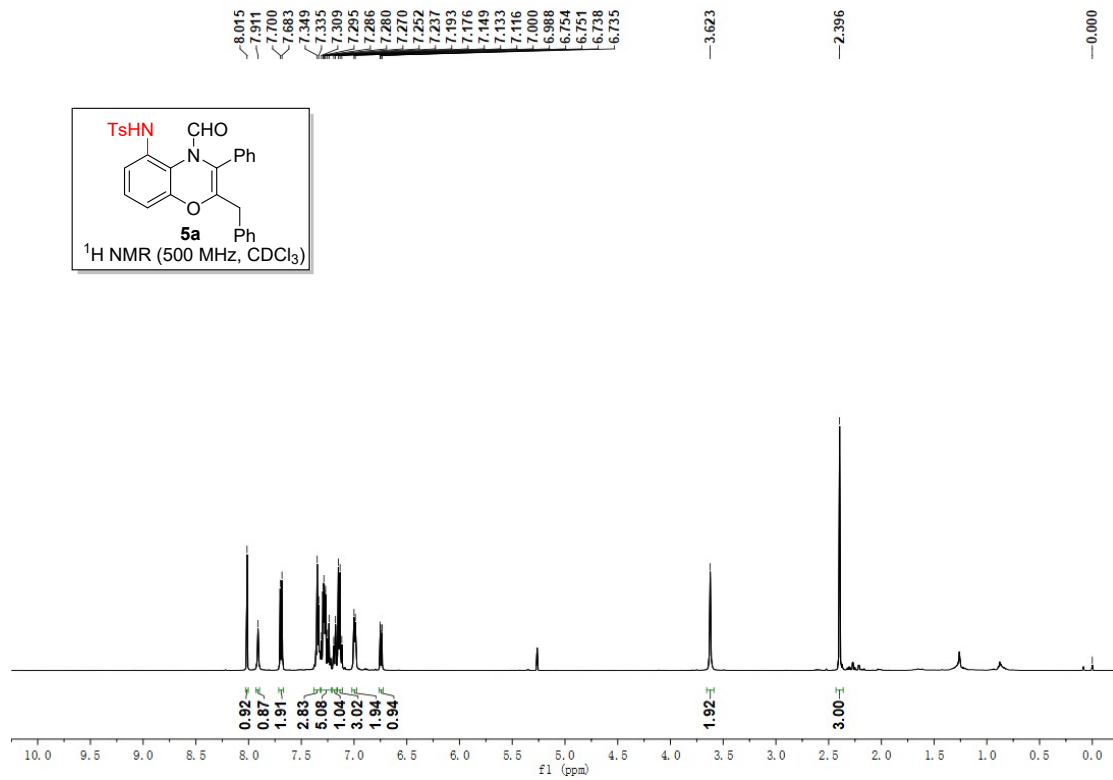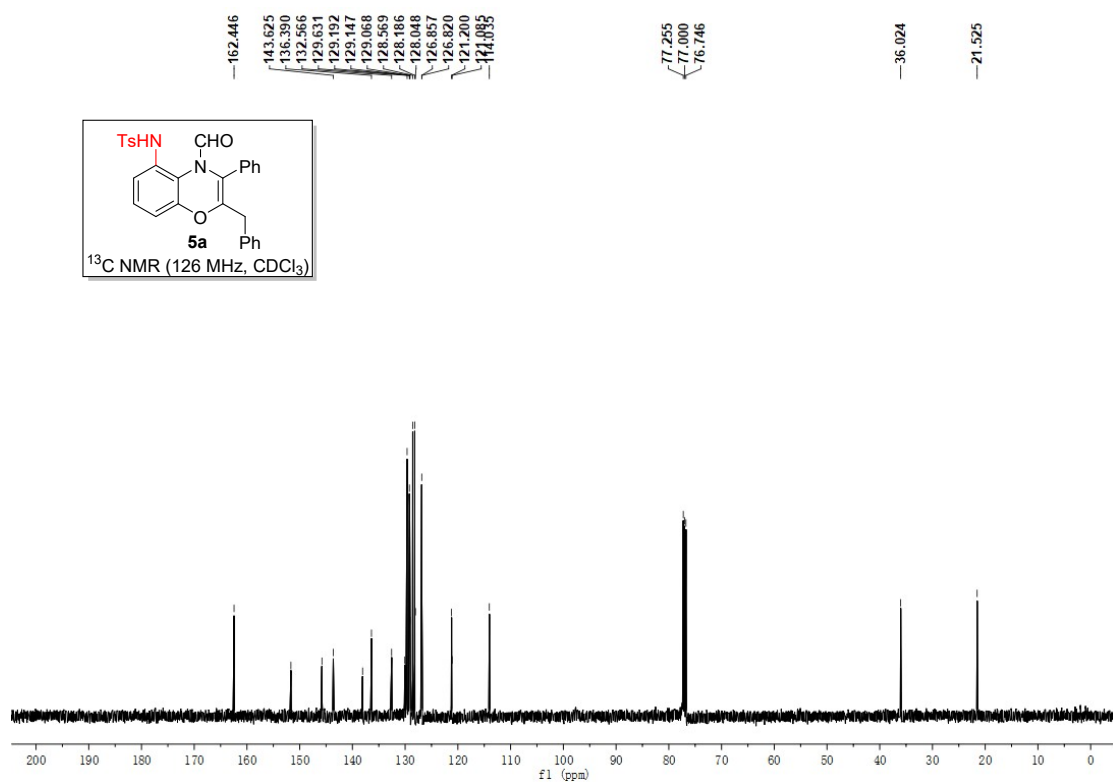

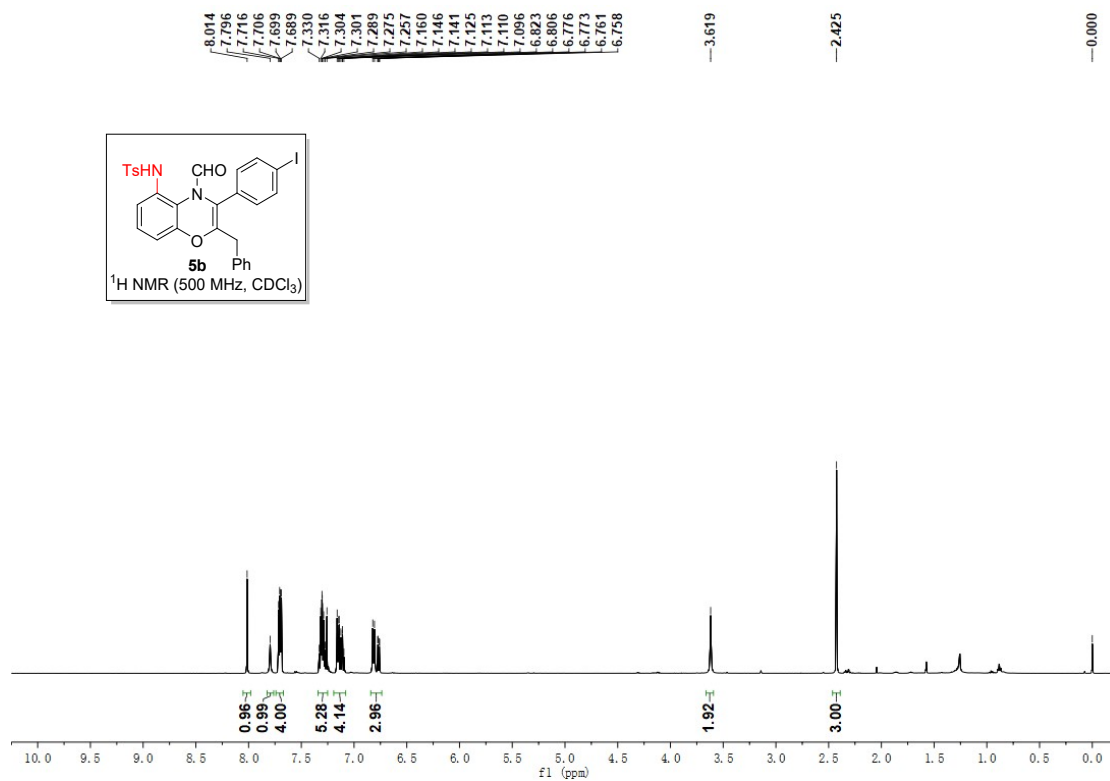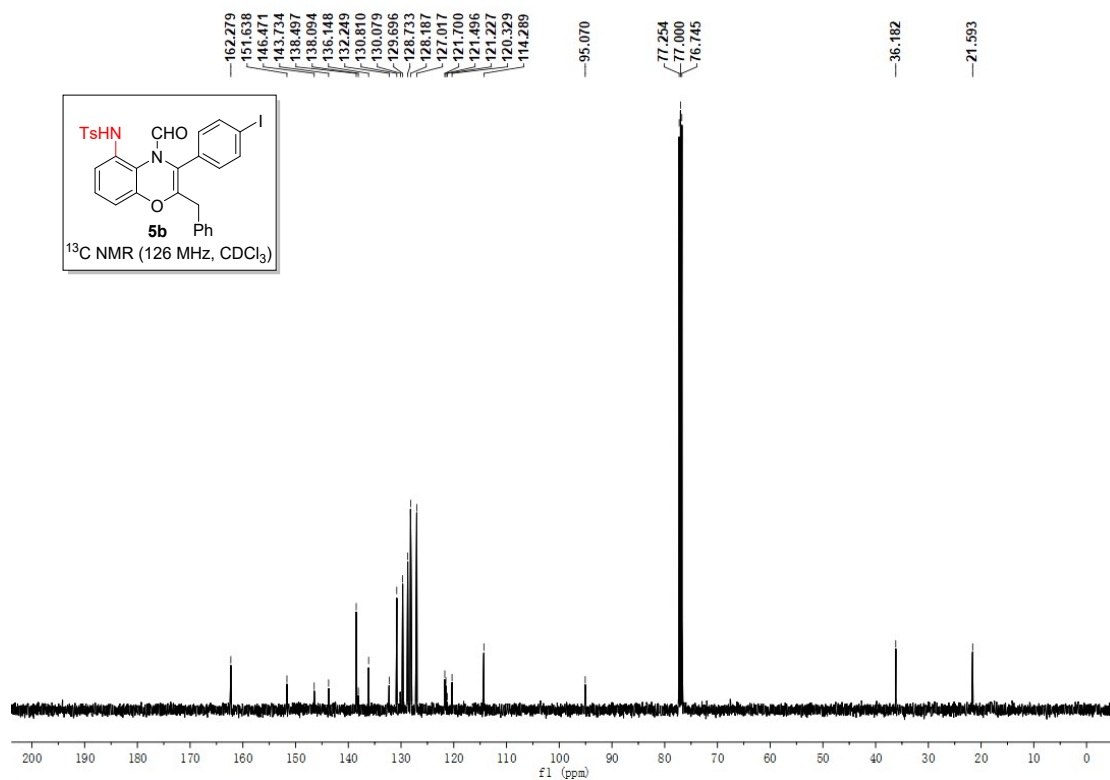



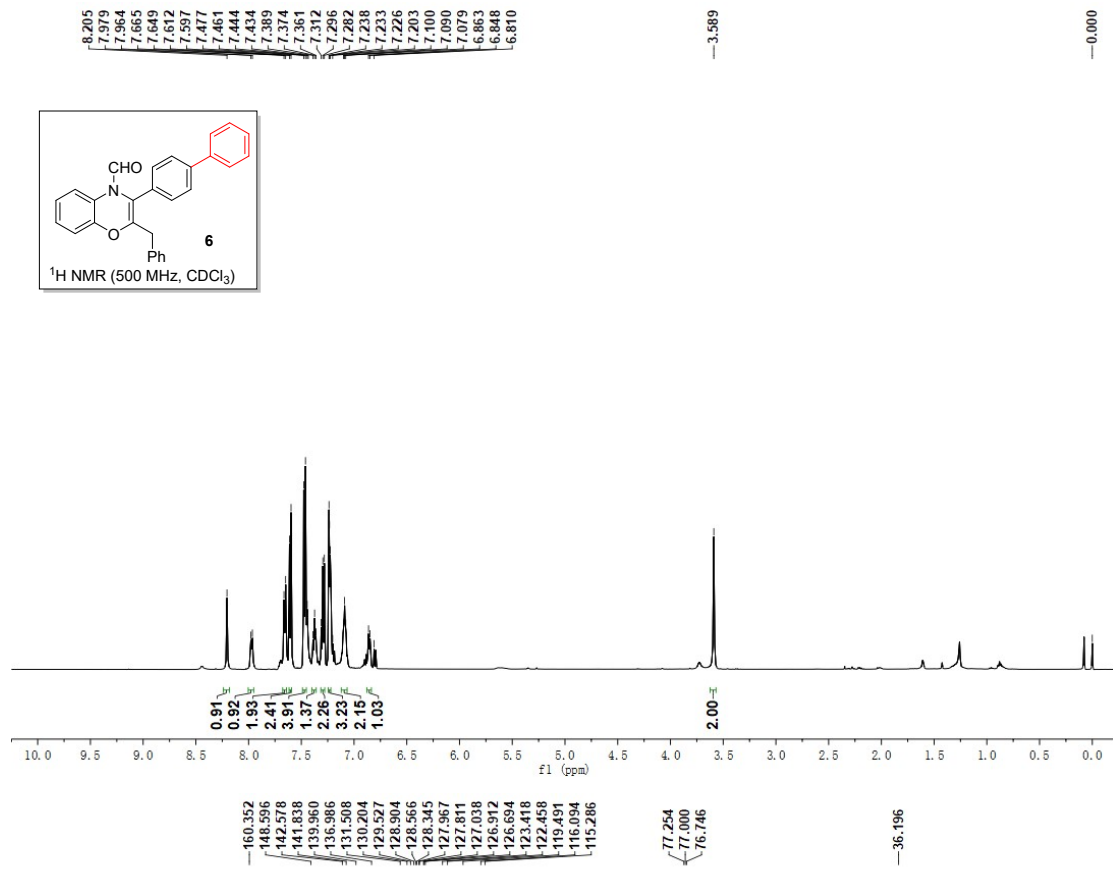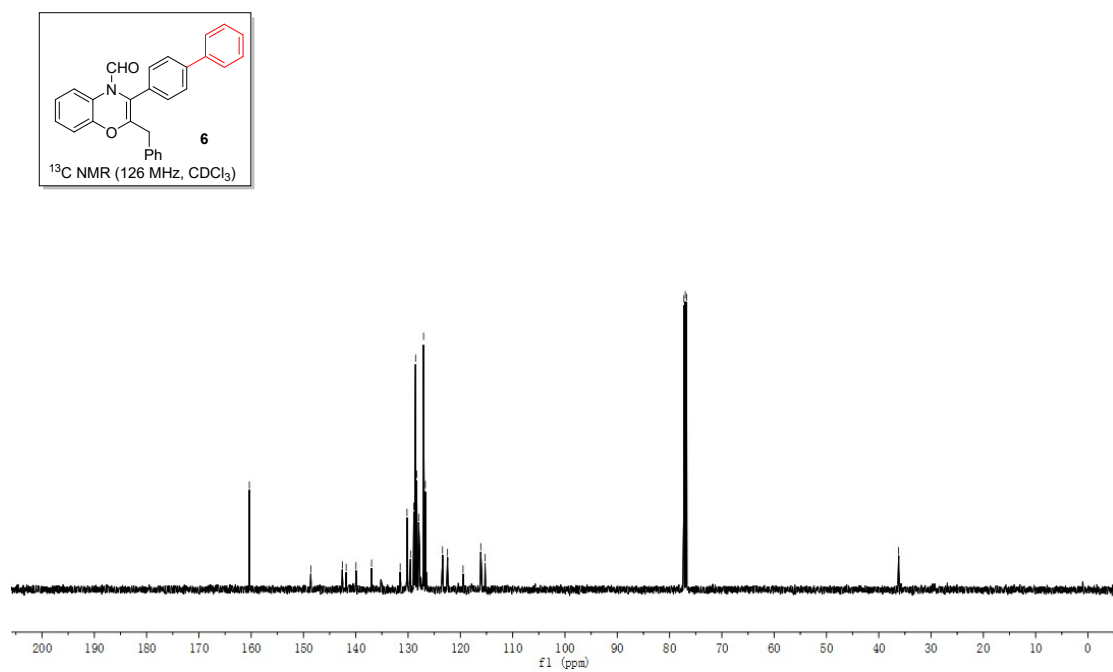

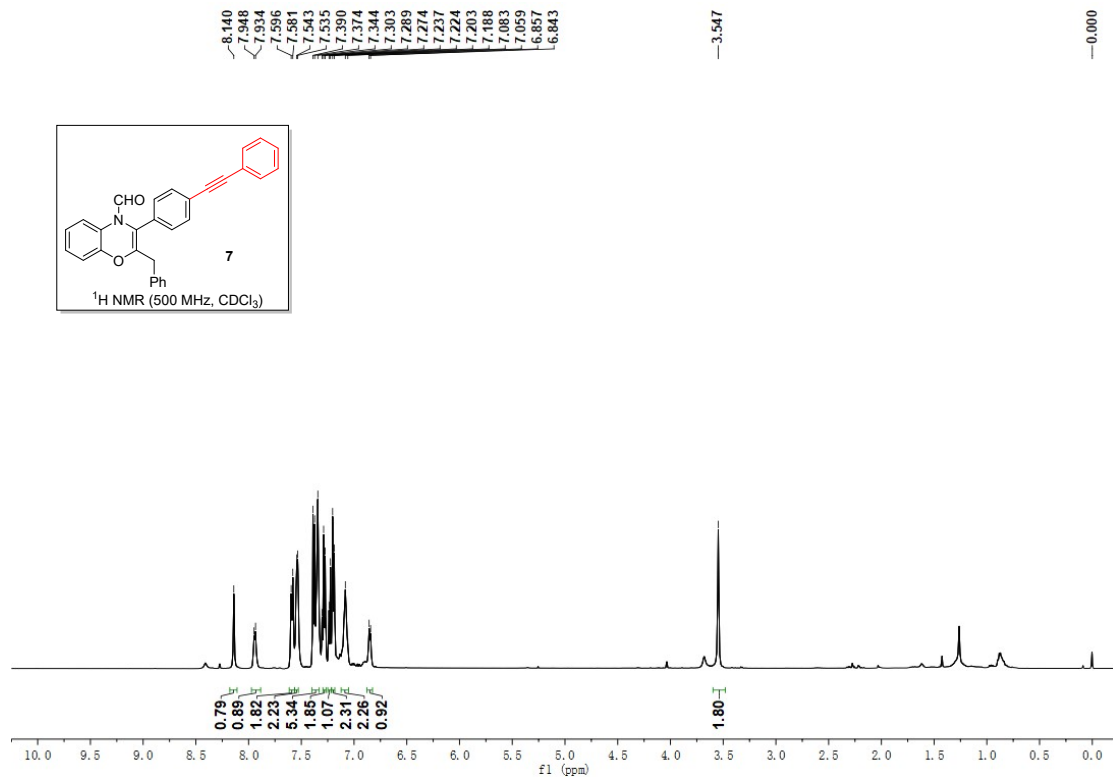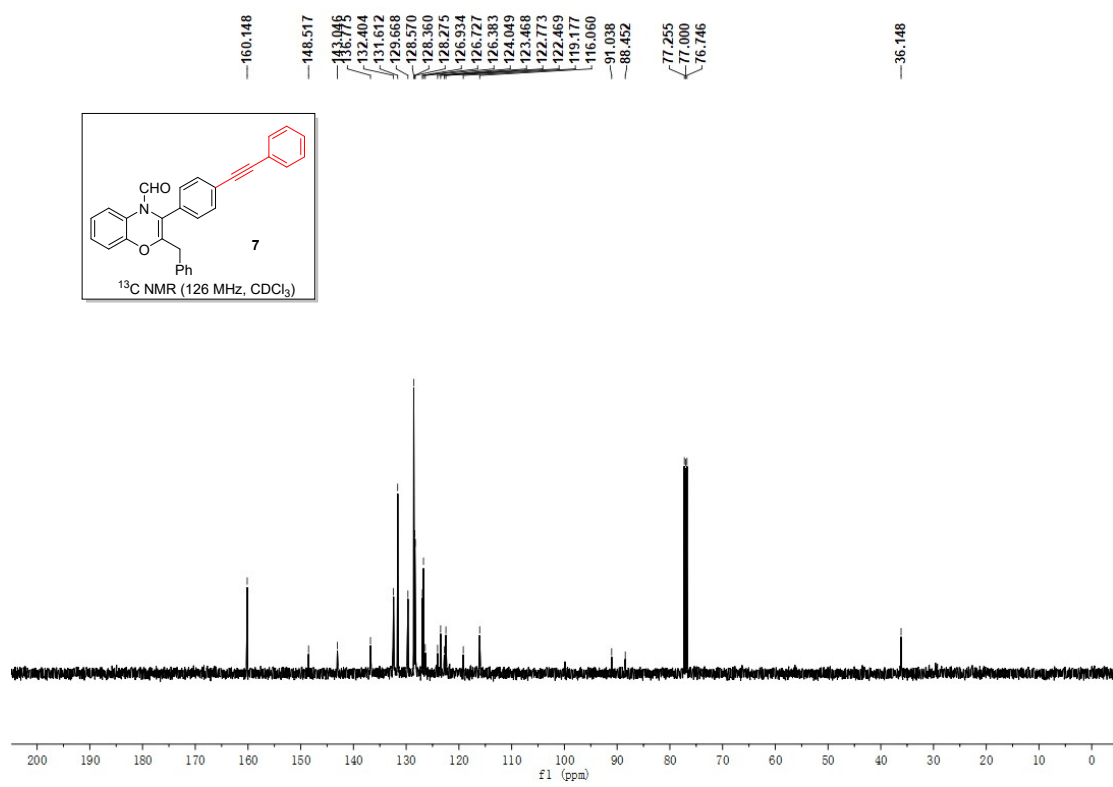

Supplement: d2cc03080b1.pdf [file d2cc03080b1.pdf]
